# Supplementary material
Source: publisher figshare collection journal article supplement (https://gsajournals.figshare.com/articles/dataset/_/14600349)

## Supplementary material

**S1 Figure.** The effect of different stresses on strains expressing Rha1-GOF. Overnight cultures of SC5314 and Rha1-GOF were spotted under the indicated stress conditions. Rha1-GOF cultures grow normally under the different stress conditions including, the metal stressors, 100mM FeSO<sub>4</sub>, 20 mM FeCl<sub>3</sub>, and 5mM CuSO<sub>4</sub>, the oxidative stress-inducing agent hydrogen peroxide (H<sub>2</sub>O<sub>2</sub>) at 5mM and the osmotic stressor 1M sorbitol, 0.4M CaCl<sub>2</sub>, 0.15mM Menadione, 38mM hydroxyurea, pH 10, Glycerol 250mM, Hygromycin B 100µg/ml MMS 0.02%.

**S2 Figure.** RNAseq analysis of Rha1-GOF. (A) Heatmap of up-regulated genes (log<sub>2</sub>fold >4, P<sub>adj</sub> <0.001) versus the WT under non hyphal conditions. (B) Top 35 down-regulated genes P-values <0.03 in the Rha1-GOF compared with the WT under non-hyphal inducing conditions.

**S3 Figure.** Rha1 strains grow normally on media without arginine. Growth curves (OD<sub>600</sub> of *C. albicans* SC5314 WT, Rha1 GOF and *rha1*<sup>-/-</sup> to determine influence of Rha1 function in arginine biosynthesis. The overnight strains were cultured in liquid SC without arginine and incubated at 30°C for 72hrs.

**S4 Figure.** One copy of Rha1 restores the filamentation morphology in *rha1* Δ/Δ. (A) The WT SC5314, SC1604M4B, (*rha1* Δ/Δ), SC1604MK2B (*rha1* Δ/Δ::RHA1) were (B) The DIC images of the indicated strains grown in the liquid Spider medium, 4 hrs at 37°C.

The complementary strain SC1604MK2B induced hyphal formation in Spider medium. Scale Bar represents 10 $\mu$ m. C) Shown are the serum treated cells after 4 hrs at 37°C. Cells which represent one copy of Rha1 add back the filamentation function. Scale bar is 5 $\mu$ m.

# S1 Figure

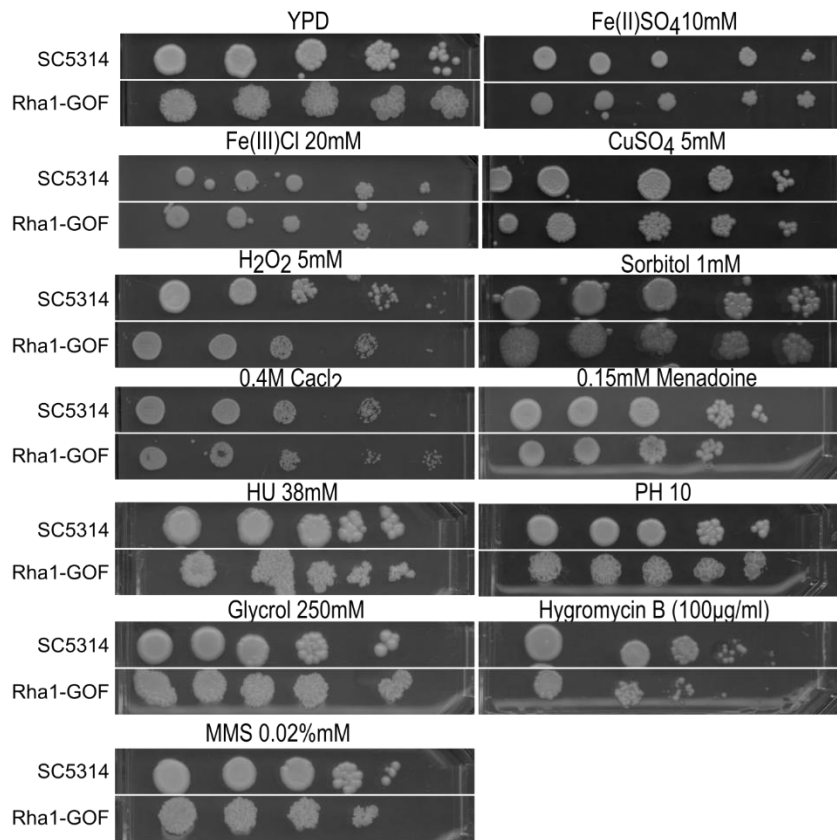

## S2 Figure

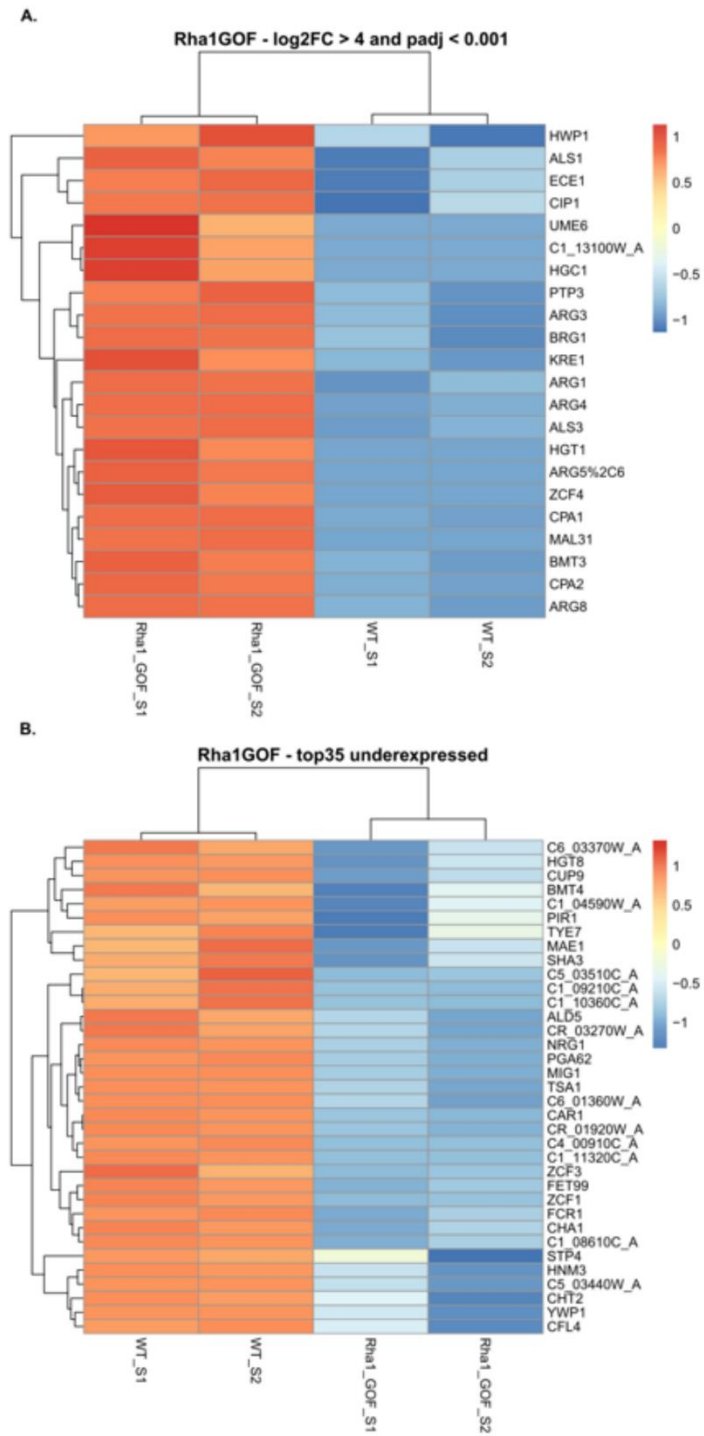

S3 Figure

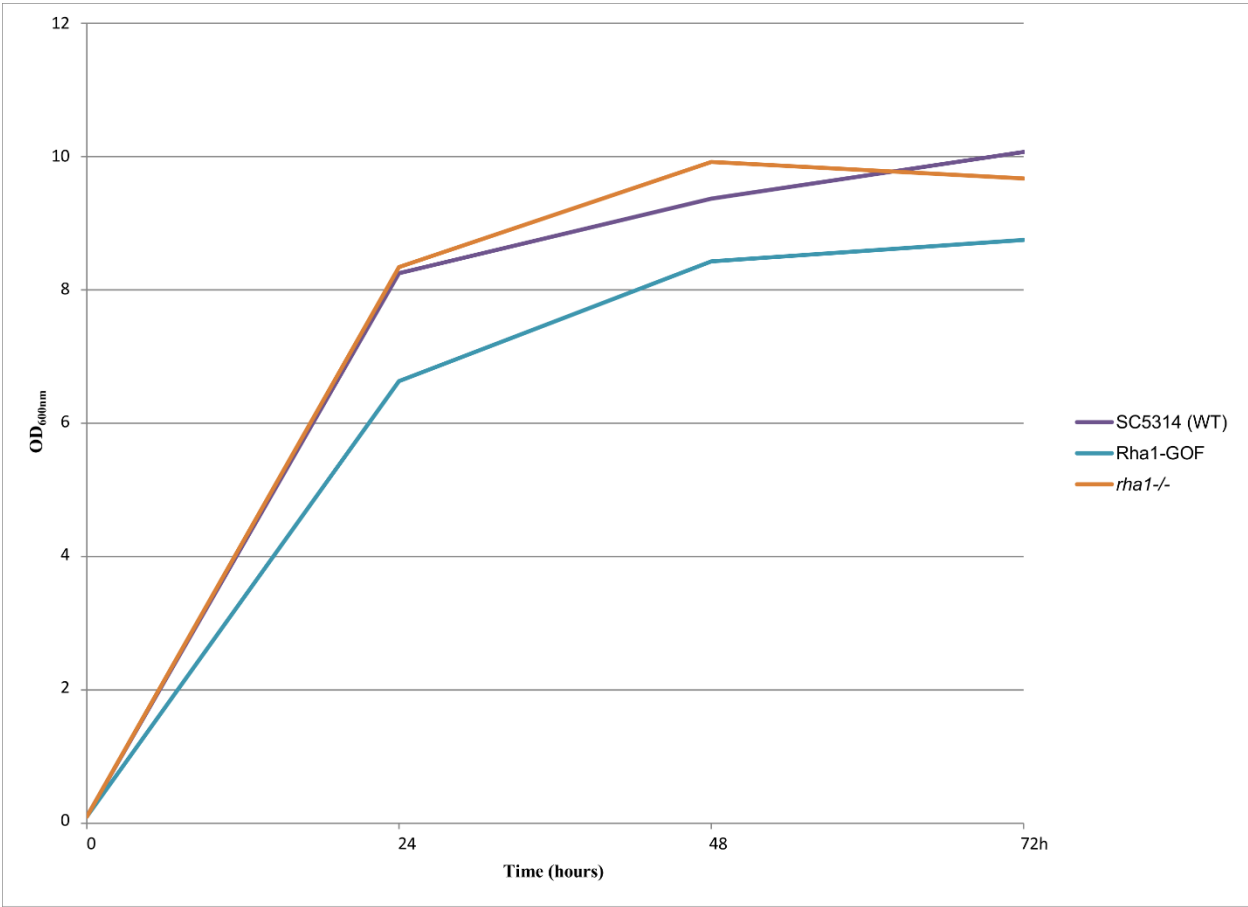

S4 Figure

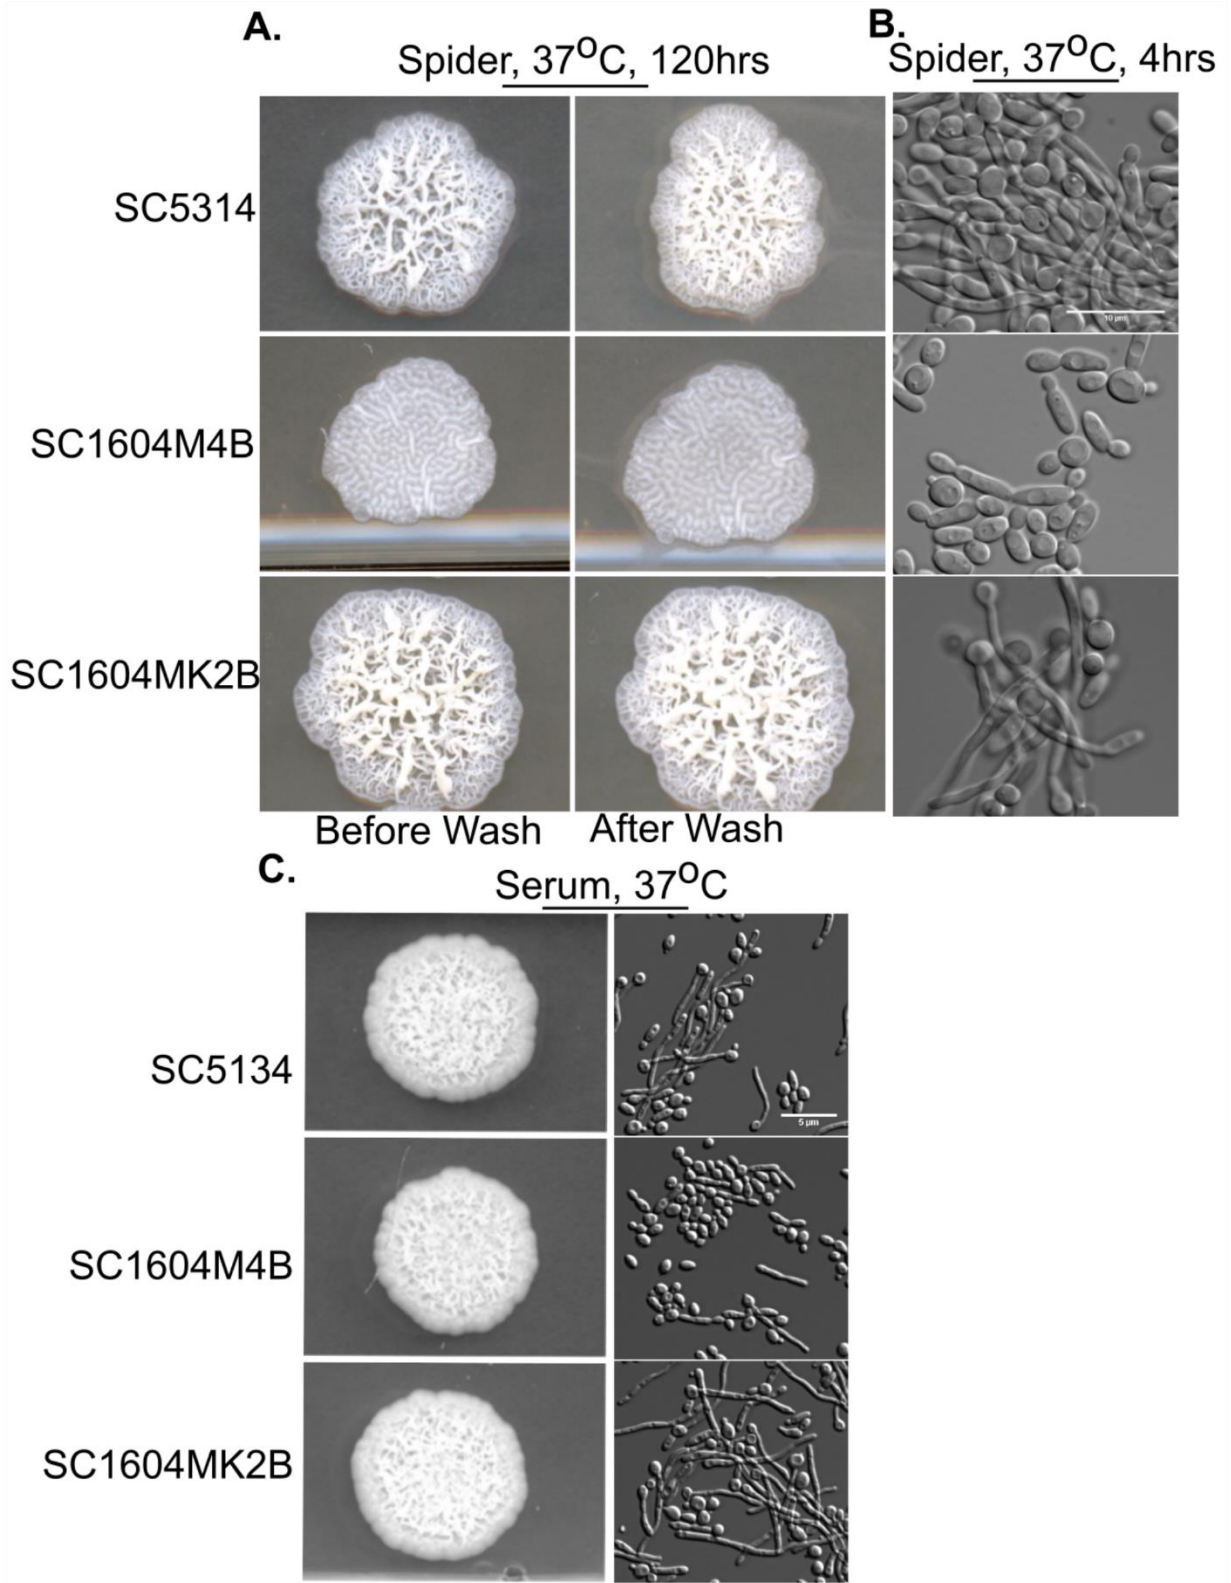

Supplement: Supplementary file 1 [file 1]
