# Supplementary material
Source: publisher figshare collection journal article supplement (https://gsajournals.figshare.com/articles/dataset/_/14600349)
Supplement: Supplementary file 1 [file 1]

## Sheet: Chip-chip data 
ID	orf19 no.	P-Values (Down)	q-Values (Down)	RP-Values (Down)	P-Values (up)	q-Values (up)	RP-Values (up)	Mean	Standard deviation
Cal101510W	orf19.6034,tP(UGG)3	0.817945	1.00186	9842.22	0.157153	1.02574	2765.54	NaN	NaN
Cal101910C	orf19.6018	0.818248	1.00181	9846.2	0.156084	1.02616	2753.47	NaN	NaN
Cal104390C	orf19.4525	0.810174	1.0008	9735.82	0.152159	1.02215	2707.95	NaN	NaN
Cal104920C	orf19.3680	0.819331	1.00195	9861.38	0.148765	1.0168	2669.68	NaN	NaN
Cal108680W	orf19.4459	0.826179	1.00262	9957.72	0.164516	1.02619	2850.22	NaN	NaN
Cal108790W	orf19.4465	0.82623	1.0026	9958.46	0.165198	1.02647	2857.86	NaN	NaN
Cal111130W	orf19.751	0.823795	1.00292	9924.25	0.160319	1.03108	2801.71	NaN	NaN
Cal113250C	orf19.2458	0.823151	1.0029	9914.56	0.160266	1.03165	2801.03	NaN	NaN
Cal114320W	orf19.6276	0.822128	1.00224	9900.47	0.162465	1.03025	2826.08	NaN	NaN
Cal119770C	orf19.4728	0.831337	1.00267	10031.5	0.126528	1.01573	2405.51	NaN	NaN
Cal120620W	orf19.4765	0.8276	1.00284	9977.96	0.143274	1.01518	2605.42	NaN	NaN
Cal129150W	orf19.6349	0.801034	0.999913	9612.01	0.149952	1.01962	2682.95	NaN	NaN
Cal202510W	orf19.2005	0.791667	1.00046	9486.64	0.209944	1.02739	3350.1	NaN	NaN
Cal203000C	orf19.1445	0.792224	0.999505	9493.88	0.208046	1.0331	3329.48	NaN	NaN
Cal203880W	orf19.1490.1	0.791454	1.00089	9483.79	0.207407	1.03205	3322.46	NaN	NaN
Cal204830C	orf19.1538	0.79195	1.00012	9490.42	0.206714	1.0325	3315.22	NaN	NaN
Cal206380C	orf19.5815	0.792062	0.999737	9491.78	0.2083	1.03189	3332.19	NaN	NaN
Cal206690W	orf19.5802	0.792461	0.99937	9496.95	0.208048	1.03276	3329.51	NaN	NaN
Cal208280W	orf19.852	0.793742	0.999506	9514.3	0.206577	1.03217	3313.74	NaN	NaN
Cal210640W	orf19.155	0.790994	1.00127	9477.52	0.214068	1.0288	3393.22	NaN	NaN
Cal212070W	orf19.3567	0.791373	1.00105	9482.72	0.213583	1.02852	3388.53	NaN	NaN
Cal214970C	orf19.1224	0.787381	1.00151	9430.31	0.216538	1.02806	3419.61	NaN	NaN
Cal302520W	orf19.2516	0.981564	1.00771	13074.8	0.0528482	0.957213	1398.29	NaN	NaN
Cal303240W	orf19.1709	0.979208	1.00801	12985.8	0.0572567	0.974912	1468.83	NaN	NaN
Cal303670C	orf19.1684	0.978492	1.00799	12959.5	0.0594527	0.983413	1502.73	NaN	NaN
Cal303770C	orf19.1680	0.976161	1.00774	12875.1	0.0661774	0.998865	1603.1	NaN	NaN
Cal303900W	orf19.1675	0.97616	1.00781	12875.1	0.0661719	0.999823	1602.98	NaN	NaN
Cal308550W	orf19.6948	0.553867	0.994491	6804.56	0.0824727	1.00338	1838.38	NaN	NaN
Cal312260W	orf19.6972	0.49204	0.996458	6183.05	0.0721111	0.997985	1690.42	NaN	NaN
Cal312270W	orf19.6972	0.491839	0.996748	6181.24	0.0728737	0.995231	1700.94	NaN	NaN
Cal312360C	orf19.6977	0.491754	0.996855	6180.31	0.0726363	0.995743	1697.54	NaN	NaN
Cal313590W	orf19.7367	0.62938	1.0025	7590.44	0.0950117	1.00564	2006.77	NaN	NaN
Cal314140W	orf19.7391	0.6245	1.00166	7538.37	0.0946384	1.0061	2001.83	NaN	NaN
Cal315300C	orf19.7445	0.633386	1.00194	7633.67	0.0995135	1.00765	2065.19	NaN	NaN
Cal404500W	orf19.4589	0.234108	1.006	3603.87	0.0254148	0.89601	903.028	NaN	NaN
Cal404750W	orf19.4577	0.232687	1.00616	3589.21	0.0271884	0.885303	940.144	NaN	NaN
Cal405110W	orf19.2771	0.234432	1.0056	3607.38	0.0268192	0.891307	932.575	NaN	NaN
Cal405720C	orf19.2747	0.262978	0.992589	3904.27	0.0237398	0.873071	867.387	NaN	NaN
Cal406880C	orf19.2682	0.28572	0.999056	4138.21	0.00173637	0.449286	199.817	NaN	NaN
Cal411510W	orf19.740	0.428117	0.998619	5550.87	0.0135942	0.778577	628.904	NaN	NaN
Cal505720C	orf19.4275	0.734421	1.00233	8773.45	0.138633	1.01198	2550.24	NaN	NaN
Cal505850W	orf19.4282	0.730575	1.00237	8726.99	0.143552	1.01516	2608.9	NaN	NaN
Cal508960W	orf19.1287	0.737324	1.00083	8807.87	0.14352	1.01543	2608.54	NaN	NaN
Cal509040W	orf19.1282	0.713515	1.00192	8528.79	0.147733	1.0179	2658.4	NaN	NaN
Cal606610W	orf19.5576	0.782344	1.00054	9364.58	0.133549	1.01741	2489.58	NaN	NaN
CalR05140W	orf19.3737	0.64509	1.00175	7759.35	0.116662	1.01406	2283.46	NaN	NaN
CalR05670C	orf19.169	0.644026	1.00193	7747.98	0.117101	1.01605	2289.27	NaN	NaN
CalR05930W	orf19.2823	0.649742	1.00061	7811.26	0.117357	1.01583	2292.24	NaN	NaN
CalR06420C	orf19.2843	0.654988	1.00103	7869.13	0.116256	1.01601	2278.37	NaN	NaN
CalR10910C	orf19.6308,orf19.6307	0.0341994	0.969765	1076	0.944413	1.00209	11999.8	NaN	NaN
CalR11130C	orf19.1806	0.0156529	0.937231	681.209	0.923879	1.0039	11558.9	NaN	NaN
Cal403030W	orf19.4651	0.983709	1.00792	13162.7	9.10973e-05	0.44	50.3389	8.2395	10.3641
Cal124590W	orf19.1836	0.722384	1.00272	8631.12	0.156462	1.02772	2757.86	7.7235	11.0938
Cal108970W	orf19.4475	0.83618	1.00292	10100.2	0.120709	1.0175	2333.77	6.063	NaN
Cal605080C	orf19.3469	0.998614	1.00228	14110.7	0.000283644	0.51375	81.719	5.9	NaN
Cal305490C	orf19.1611:orf19.1610	0.999786	1.00068	14344.4	0.000102139	0.37	53.1037	5.799	NaN
Cal313460W	snR44d	0.999756	1.00086	14332.6	1.0352e-05	0.075	17.72	5.7445	3.68756
CalR14670C	orf19.693	0.689048	0.99983	8246.93	0.0756756	1.00049	1741.9	5.44	NaN
Cal705790C	orf19.3699	0.999344	1.00142	14229.4	0.000326432	0.473	86.9483	4.794	NaN
Cal703610W	orf19.6556	0.999545	1.0012	14270.6	0.000347826	0.336	89.2244	4.376	NaN
CalR00780C	orf19.7504	0.999301	1.00151	14221.4	0.000495514	0.312174	106.236	4.302	NaN
CalR14640W	orf19.915	0.00127536	0.7392	170.106	0.0117115	0.767873	577.275	4.236	NaN
Cal703210W	orf19.6579	0.999529	1.00133	14267.1	0.000458247	0.349474	102.47	4.232	NaN
Cal122820C	orf19.4865	0.99762	1.00295	13991.2	0.00110559	0.4005	157.823	4.223	NaN
CalR12830W	orf19.6639	0.0197453	0.9537	779.361	0.0143023	0.800154	647.318	4.148	NaN
Cal124440W	orf19.1830	0.998402	1.00228	14084.6	0.00102415	0.390526	152.283	4.1405	0.111016
Cal704720W	snR8c	0.790806	1.00147	9475.67	0.000742581	0.371034	128.794	4.01	5.26936
Cal101780W	orf19.6023	0.997112	1.00362	13942.3	0.00151139	0.45625	185.79	3.96	NaN
Cal125720C	snR64	0.995966	1.00421	13840.2	0.000396825	0.359375	94.1382	3.949	3.24986
Cal607650W	orf19.5701	0.999987	0.999987	14449.4	6.21118e-06	0.09	12.7279	3.909	1.13137
Cal208320W	orf19.851	0.9942	1.00432	13710.3	0.00225328	0.44726	231.37	3.888	NaN
Cal114930C	orf19.6249	0.996545	1.00382	13888.5	0.00191235	0.461833	211.225	3.791	NaN
Cal203770W	orf19.1486	0.991137	1.00614	13515.7	0.000674948	0.349286	122.572	3.6435	3.20814
Cal310850W	orf19.5940	0.99982	1.00065	14355.2	0.000458247	0.349474	102.606	3.639	NaN
Cal701790W	orf19.7033	0.42828	0.998354	5552.52	0.00162802	0.481429	192.585	3.5865	5.70282
Cal303510W	orf19.1693	0.942297	1.00849	11950.2	0.00122636	0.403864	166.709	3.5505	3.87707
Cal221690W	orf19.1389	0.994359	1.00434	13721.2	0.0031608	0.503297	277.314	3.46	NaN
CalR03300W	orf19.2529.1	0.999226	1.00158	14207.2	0.0012167	0.41	165.952	3.456	NaN
CalR06920C	orf19.2419	0.990754	1.00631	13493.9	0.00094824	0.381667	145.176	3.393	2.87085
Cal105840W	orf19.2951	0.824758	1.00283	9938.22	0.124429	1.01633	2379.82	3.36	NaN
Cal401680C	orf19.4163	0.999826	1.00059	14356.3	0.000556936	0.3228	112.641	3.358	NaN
Cal118140W	orf19.5070	0.831596	1.00256	10035.4	0.122617	1.01527	2358.04	3.316	NaN
Cal113500W	orf19.2446,orf19.2445	0.829355	1.00278	10003.2	0.131424	1.01348	2464.84	3.206	NaN
Cal302200W	orf19.2501	0.444052	0.997878	5707.69	0.195606	1.03179	3194.32	3.173	5.37684
Cal223440W	orf19.1742	0.972114	1.00844	12739.5	0.00171912	0.461296	198.454	3.142	2.97126
CalR13640W	orf19.3863	0.00895514	0.933525	494.996	0.0335148	0.911126	1062.53	3.135	NaN
Cal216580W	orf19.1893	0.587366	0.99835	7148.89	0.00230297	0.439079	234.126	3.0795	4.5573
Cal203610W	orf19.1479	0.996262	1.00395	13865.7	0.0127598	0.770375	606.341	3.0335	1.58745
Cal122990C	orf19.4872	0.997277	1.00344	13957.6	0.00343133	0.528936	289.9	3.027	NaN
Cal305550W	orf19.1608	0.99512	1.00434	13775.3	0.0107798	0.758252	550.91	3.003	NaN
Cal401160W	orf19.4189	0.999778	1.00075	14341.4	0.000859903	0.389375	138	2.999	NaN
Cal114410W	orf19.6272	0.997727	1.00264	14002.8	0.00405452	0.549065	317.666	2.988	0.308299
Cal113450C	orf19.2447	0.997865	1.00264	14020.4	0.00252588	0.446341	245.357	2.9295	0.423557
Cal113310W	orf19.2455	0.996517	1.00386	13886	0.00425397	0.555315	325.906	2.929	NaN
Cal603150C	orf19.3439	0.946504	1.00896	12048.1	0.00245135	0.44962	240.925	2.924	2.95288
Cal501490W	orf19.921	0.993647	1.00453	13672.5	0.00144721	0.45587	181.692	2.9135	2.04
CalR02890W	orf19.3228	0.999828	1.00052	14357.8	0.000463078	0.305	103.116	2.88	0.970151
Cal123480W	orf19.4892	0.997995	1.00263	14036.1	0.00374465	0.531961	304.158	2.8615	0.123744
CalR05960W	orf19.2825	0.999056	1.00189	14178	0.00228778	0.442	233.217	2.858	NaN
Cal109610C	orf19.1063	0.986413	1.00769	13279.7	0.00171222	0.477115	198.038	2.831	2.23163
CalR02800C	orf19.3231	0.99962	1.00107	14291.5	0.00171014	0.485882	197.864	2.824	0.367696
Cal121850C	orf19.4821	0.996552	1.00376	13888.9	0.0116342	0.766273	574.957	2.817	1.1738
Cal123740W	orf19.4903	0.997267	1.0035	13956.7	0.00197585	0.447344	215.119	2.8155	1.2438
Cal113750C	orf19.2433	0.997108	1.00369	13941.8	0.00771843	0.69037	455.538	2.812	0.666095
CalR05880C	orf19.2822	0.999741	1.00091	14327.1	0.00063285	0.33963	118.642	2.8105	1.00338
Cal501200W	orf19.935	0.971707	1.00867	12727	0.00222912	0.448611	229.817	2.796	2.48902
Cal101650W	orf19.6029	0.996618	1.00368	13895.4	0.00524431	0.593672	366.257	2.722	NaN
CalR21090W	tD(GUC)7	0.0375162	0.990182	1136.68	0.0526025	0.961173	1394.32	2.704	NaN
Cal102480W	orf19.3302	0.990283	1.00654	13469	0.00252933	0.441566	245.55	2.6975	1.90282
Cal404900W	orf19.4568	0.999892	1.00031	14386.4	0.000416149	0.354706	97.1494	2.683	NaN
Cal402130W	orf19.4698	0.999903	1.00011	14390.4	0.000342995	0.355	88.5664	2.663	NaN
Cal503520C	orf19.4153	0.998386	1.00233	14082.2	0.00403934	0.55217	316.973	2.641	NaN
Cal405960C	snR79	0.999908	1.00005	14393.3	0.000148378	0.43	61.6928	2.6325	0.0968737
Cal411300W	orf19.3777	0.994142	1.00447	13706	0.000327812	0.395833	87.264	2.615	1.99121
Cal120520C	orf19.4760	0.997469	1.00329	13975.3	0.00298275	0.491136	269.178	2.61	0.760847
Cal210900W	orf19.4128	0.664673	1.00074	7975.5	0.167206	1.02792	2880.37	2.6095	4.02697
Cal403610C	snR78	0.999891	1.00037	14383.4	0.000326432	0.473	86.741	2.58	NaN
CalR04960W	orf19.3749	0.992561	1.00547	13601.3	0.00311387	0.501333	275.363	2.5705	1.60443
Cal221410W	snR44c	0.993036	1.00497	13633.6	0.00941063	0.733118	509.627	2.565	NaN
Cal601710W	orf19.84	0.999921	0.99999	14399.9	0.000228433	0.472857	73.973	2.5625	0.156271
Cal303060W	orf19.1716	0.997578	1.00319	13986.6	0.00336853	0.530543	287.134	2.548	0.639224
Cal126170W	orf19.666:orf19.665	0.997104	1.00375	13941.6	0.00755003	0.68805	449.462	2.5425	0.241123
Cal503320W	orf19.4145	0.9999	1.00018	14389.4	0.000294686	0.474444	82.9458	2.5275	0.132229
Cal405970W	snR79	0.999842	1.00039	14362.6	0.000225673	0.545	73.2052	2.5175	0.201525
Cal131180W	orf19.4996	0.993119	1.00477	13638.9	0.010352	0.761421	538.227	2.501	NaN
Cal117600W	orf19.1233	0.974466	1.00792	12816.5	0.0527032	0.959384	1396.11	2.491	2.2288
Cal501140C	orf19.936	0.999895	1.00024	14388	0.000461698	0.318571	102.995	2.4855	0.542351
Cal129960C	orf19.4934	0.997228	1.00353	13953.1	0.00671705	0.666644	420.613	2.483	0.0240416
CalR06500C	orf19.2847	0.099686	1.00309	2067.28	0.0023913	0.444231	238.294	2.469	5.74171
Cal107770W	orf19.3048	0.997186	1.00363	13948.8	0.00843823	0.715029	478.644	2.464	0.329512
Cal203720W	orf19.1484	0.997394	1.00335	13968.2	0.00722774	0.68451	438.178	2.4565	0.143543
CalR02440C	orf19.3250	0.984994	1.00752	13218.6	0.00457833	0.571897	338.916	2.433	1.69988
Cal316870W	orf19.6780	0.999125	1.00175	14188.5	0.00369082	0.5348	301.247	2.422	0.223446
Cal405330C	orf19.2763	0.990442	1.00635	13477.5	0.000514838	0.310833	108.194	2.416	1.90919
CalR05610W	orf19.172	0.974734	1.00777	12825.8	0.00512284	0.584488	361.181	2.4135	1.89434
Cal222820W	orf19.1767	0.997589	1.00313	13987.5	0.00584403	0.622647	389.107	2.3995	0.167584
Cal709160W	orf19.7152	0.999623	1.001	14292	0.00168944	0.4896	196.726	2.3955	0.27365
Cal609460W	orf19.1078	0.998767	1.00222	14131.4	0.00443754	0.569026	333.054	2.394	NaN
Cal204760W	orf19.1535	0.993113	1.0049	13638.3	0.0116342	0.766273	574.978	2.388	NaN
Cal219360W	orf19.3615	0.997631	1.00289	13992.4	0.00506625	0.58728	358.594	2.3855	0.358503
Cal706670W	orf19.5145	0.999456	1.00146	14250.9	0.00175017	0.444912	200.823	2.383	0.651953
Cal202570W	orf19.2002	0.992226	1.00555	13580	0.00424707	0.559455	325.607	2.3815	1.35128
Cal219160W	orf19.3625	0.997061	1.00378	13937.4	0.00898965	0.719669	496.298	2.3815	0.276479
Cal305940W	orf19.242.2	0.999056	1.00189	14177.7	0.00195859	0.457742	213.846	2.3805	0.945402
Cal603470W	orf19.3430	0.998827	1.00208	14139.4	0.00209041	0.445441	222.351	2.359	1.0946
Cal508490C	orf19.1108	0.997607	1.00301	13989.7	0.0069441	0.675302	428.328	2.351	NaN
Cal701560W	orf19.7043.1	0.999141	1.0017	14192	0.0035873	0.535876	296.825	2.3485	0.0629325
Cal109080W	orf19.4479	0.993792	1.00454	13682.3	0.00450932	0.573158	335.969	2.3395	1.20703
Cal506930W	orf19.4347	0.999835	1.00046	14360	0.000775017	0.374333	130.863	2.3385	0.55225
Cal312550W	orf19.6983	0.846906	1.00341	10255.5	0.00660248	0.664375	416.298	2.3335	2.68488
Cal316780W	orf19.6783	0.955845	1.00795	12277.1	0.0063637	0.658643	407.995	2.329	2.01667
Cal405350W	orf19.2763	0.999292	1.00157	14219.7	0.000342995	0.355	88.572	2.313	0.64771
Cal204880W	orf19.1541	0.909287	1.00546	11279.3	0.00727536	0.675769	439.88	2.3025	2.3384
Cal316260C	orf19.6805	0.998253	1.0024	14066.7	0.00649896	0.667872	412.519	2.2995	0.627204
Cal602930W	orf19.3448	0.746176	1.00195	8915.02	0.0208406	0.865272	804.045	2.297	NaN
Cal504420W	orf19.3171	0.997642	1.00276	13993.6	0.00728088	0.671975	440.186	2.287	NaN
Cal408110W	tQ(UUG)1	0.985689	1.00759	13249.4	0.00566943	0.627099	382.638	2.281	1.45805
CalR02990W	orf19.3223	0.873369	1.00437	10662.6	0.00788061	0.692061	460.539	2.279	2.49184
Cal312670W	orf19.6986	0.998961	1.00193	14162.3	0.00245204	0.444125	241.015	2.277	0.821658
Cal108700W	orf19.4461	0.835011	1.00259	10083.7	0.125897	1.01743	2398.05	2.275	NaN
CalR14450W	orf19.717	0.998556	1.00229	14102.9	0.0056922	0.624849	383.488	2.271	0.451134
Cal408400W	orf19.1304	0.999655	1.00097	14299.9	0.00084403	0.394516	136.872	2.2675	0.159099
Cal703110C	orf19.6583	0.988484	1.00718	13377.4	0.00578468	0.625522	386.988	2.265	1.34209
Cal312400W	orf19.6979	0.99917	1.00166	14197	0.00350449	0.534526	293.448	2.263	NaN
Cal210480C	orf19.145	0.996308	1.00393	13869.4	0.00583713	0.626519	388.886	2.252	0.619426
Cal222870W	orf19.1766	0.991765	1.00593	13552.6	0.0264424	0.891046	924.345	2.2505	1.20137
Cal403330W	orf19.4635	0.999758	1.00079	14333	0.00110697	0.39122	157.987	2.249	0.548715
Cal307700W	orf19.333	0.999551	1.00114	14272.2	0.00173637	0.449286	199.775	2.2455	0.668216
Cal504640W	orf19.4217	0.998054	1.00255	14042.9	0.000455487	0.366667	102.235	2.2445	0.9751
Cal105570W	orf19.2939	0.933401	1.00805	11755.9	0.0080283	0.696587	465.51	2.2405	2.0895
Cal407600W	orf19.3369	0.274484	0.996061	4023.3	0.0310393	0.901323	1014.56	2.236	NaN
Cal109150C	orf19.1039	0.996426	1.00391	13878	0.00657971	0.666713	415.638	2.228	0.523259
Cal315240C	orf19.7443	0.998622	1.00215	14111.9	0.00549827	0.617597	375.948	2.2265	0.344361
Cal105070C	orf19.3686	0.979578	1.00782	12998.8	0.0067481	0.66517	421.73	2.223	1.52311
CalR02110W	orf19.3264	0.688134	0.999305	8237.08	0.00670807	0.670345	420.064	2.2225	3.06672
Cal313300W	orf19.7357	0.998783	1.00217	14133.4	0.00273775	0.461279	257.119	2.218	0.879641
Cal207300W	orf19.906	0.810533	1.00108	9740.79	0.134026	1.01784	2495.42	2.206	NaN
Cal120300W	snR190	0.996583	1.00372	13892.4	0.0110835	0.753991	559.594	2.2025	0.231224
Cal210880C	orf19.182	0.975548	1.00775	12854.1	0.0541677	0.965424	1419.57	2.187	1.7508
Cal303010W	orf19.1718	0.957744	1.00804	12328.1	0.00806004	0.695179	466.867	2.187	1.79322
Cal702930C	orf19.6920	0.99862	1.00222	14111.6	0.00304279	0.495393	272.044	2.1775	0.853478
Cal510990W	orf19.3982	0.999464	1.0014	14252.5	0.00120842	0.416905	165.336	2.175	0.230517
Cal305220W	orf19.1621	0.994162	1.00442	13707.3	0.0197667	0.857545	779.854	2.17	0.684479
CalR10760W	orf19.6312	0.99966	1.0009	14301.4	0.00142995	0.460444	180.881	2.1495	0.263751
Cal106200W	orf19.2965.1	0.996248	1.00401	13864.7	0.00921118	0.72538	503.39	2.147	0.233345
Cal607720W	orf19.5711	0.696329	1.00087	8328.83	0.00947343	0.73016	511.63	2.1435	2.93237
Cal402060W	orf19.4701	0.982839	1.00824	13125.9	0.00772533	0.686748	455.838	2.1425	1.33148
Cal403590C	snR77b	0.985947	1.00764	13260.2	0.00758385	0.686813	450.664	2.1395	1.24663
Cal501010W	orf19.942	0.868304	1.00333	10581.4	0.00971153	0.732917	519.346	2.131	2.30234
Cal214910W	orf19.81	0.987948	1.00713	13351	0.00743892	0.682215	445.354	2.1305	1.16178
Cal702770W	orf19.6910,orf19.6912	0.992749	1.00496	13614.3	0.00695238	0.6716	428.684	2.1235	0.935502
Cal406680W	orf19.2691	0.99831	1.00232	14073.7	0.00374741	0.527184	304.25	2.113	0.838629
Cal101940C	orf19.6017	0.99624	1.00407	13864.2	0.0105832	0.76675	545.203	2.111	0.0707106
Cal412130C	orf19.1795.1	0.999603	1.00112	14286.3	0.000930297	0.396471	143.496	2.11	NaN
Cal309370W	orf19.5854.1	0.999062	1.00176	14178.9	0.00382333	0.532692	307.465	2.103	0.00989945
Cal108750W	orf19.4464	0.982851	1.00803	13126.5	0.04247	0.932409	1225.04	2.1005	1.44886
Cal317050W	orf19.6769	0.998884	1.00207	14149	0.00463906	0.560167	341.789	2.0965	0.0671752
Cal110100W	orf19.6842,orf19.6843	0.994982	1.00427	13764.1	0.00882471	0.722429	490.469	2.0955	0.581949
Cal406650W	orf19.2693	0.997575	1.00325	13986.4	0.000875086	0.384242	139.499	2.091	0.869741
Cal701000W	orf19.7072	0.998954	1.002	14160.3	0.00365908	0.535556	299.76	2.084	0.606698
Cal217300W	orf19.2209	0.990326	1.00651	13471.1	0.00807522	0.692367	467.249	2.0785	0.990657
Cal131870W	orf19.5026	0.991828	1.00592	13556	0.0182374	0.857987	744.693	2.06	NaN
Cal304300W	tV(AAC)2,orf19.1662	0.993789	1.0046	13682.2	0.00876398	0.729828	488.598	2.06	0.758018
Cal301060W	orf19.5413:orf19.5412	0.949056	1.00812	12107.8	0.0106108	0.761139	546.346	2.054	1.68999
Cal505760W	orf19.4278	0.9995	1.00137	14260.7	0.00190614	0.468136	210.798	2.0525	0.1492
Cal607150C	orf19.5607	0.48107	0.998954	6073.21	0.0020283	0.438657	218.586	2.052	3.74342
Cal503630C	orf19.6294	0.999538	1.00127	14268.9	0.00195583	0.46459	213.738	2.05	0.275772
Cal130690W	orf19.4966	0.991107	1.00618	13513.7	0.00912284	0.72235	500.488	2.047	0.900854
Cal503820W	orf19.3202	0.989967	1.00657	13452.1	0.00882057	0.726193	490.317	2.047	0.956008
Cal509750W	orf19.3922	0.992219	1.00561	13579.6	0.00101242	0.396487	151.003	2.045	1.22895
Cal603810W	orf19.3415	0.991044	1.00625	13509.5	0.000936508	0.387714	144.073	2.0425	1.3527
CalR05640W	orf19.171	0.599864	0.997937	7278.6	0.0107723	0.761415	550.621	2.0415	3.05541
Cal703630W	orf19.6555	0.769947	1.00166	9206.11	0.0115445	0.767339	572.561	2.0415	2.56185
Cal403290W	orf19.4639:orf19.4637	0.999304	1.00145	14222.1	0.00201656	0.442727	217.917	2.035	0.0608112
Cal508660C	orf19.3219	0.996815	1.00367	13915.3	0.0105977	0.76398	545.738	2.031	NaN
Cal401660C	orf19.4164	0.985473	1.00759	13239.4	0.00941477	0.729519	509.804	2.0285	1.09531
Cal200490W	orf19.2108:orf19.2107.1	0.986005	1.00763	13262.3	0.039089	0.937748	1165.42	2.0265	1.19289
CalR15530W	orf19.178	0.998273	1.00235	14068.8	0.00505245	0.590403	358.05	2.0265	0.647003
Cal224050C	orf19.5356	0.875175	1.00454	10692.3	0.115836	1.0191	2272.77	2.016	2.46639
Cal306690W	orf19.278:orf19.279	0.999001	1.0019	14167.9	0.00411594	0.547156	320.514	2.0155	0.116673
CalR21200W	orf19.7344	0.990073	1.00647	13458.3	0.0303879	0.894959	1001.8	2.015	0.998435
Cal205510W	orf19.1576	0.99545	1.00404	13798.9	0.01555	0.819345	678.687	2.0145	0.272236
CalR05760W	orf19.164,orf19.163	0.99609	1.0042	13850.6	0.00968737	0.738789	518.463	2.013	0.784889
CalR22050W	orf19.7561	0.995406	1.00414	13795.9	0.0144396	0.804731	650.483	2.013	0.103238
CalR03660W	orf19.2549	0.980642	1.0077	13037.6	0.0103112	0.766205	537.293	2.006	1.18511
CalR01060C	orf19.7490	0.984744	1.00784	13207.6	0.0102574	0.770104	535.558	2.0015	1.07127
CalR13570W	orf19.3859	0.944905	1.00882	12011	0.0119379	0.775695	583.702	2.0015	1.65251
Cal705800W	orf19.3699	0.895398	1.00646	11030.7	0.0124645	0.778491	597.947	1.9955	1.97495
Cal108920C	orf19.4473	0.995242	1.00439	13782.8	0.0122712	0.773087	592.727	1.988	0.234759
Cal705290C	orf19.6469	0.987103	1.0074	13312	0.0205335	0.859913	797.195	1.9875	1.31875
Cal105220W	orf19.3693	0.995302	1.00424	13787.8	0.0133996	0.782903	623.293	1.986	0.0961665
Cal223090W	orf19.1756	0.995433	1.0041	13797.8	0.0155224	0.820876	677.889	1.9815	0.215668
CalR13840C	snR61	0.990508	1.00634	13481.3	0.0112291	0.756791	563.505	1.977	0.816001
Cal603420W	orf19.3431	0.998221	1.00244	14063.5	0.0022588	0.442297	231.545	1.9735	0.492853
Cal120450W	orf19.4757	0.994623	1.00419	13738.9	0.0120352	0.771637	586.565	1.973	0.379009
Cal502370W	orf19.1964	0.998826	1.00215	14139.2	0.00237543	0.447013	237.398	1.9705	0.25668
Cal317500C	orf19.6738	0.976764	1.00771	12896.2	0.0268068	0.892943	932.247	1.9675	1.57331
Cal118540W	orf19.5094	0.994721	1.00415	13745.5	0.0131677	0.78843	617.093	1.965	0.248902
Cal317630W	orf19.6736	0.998023	1.00259	14039.6	0.00726501	0.683571	439.545	1.957	0.182434
Cal204740W	orf19.1534	0.991198	1.00613	13519.2	0.0119779	0.771378	584.723	1.956	0.743876
Cal222390W	orf19.1356	0.994874	1.00423	13756.7	0.0175038	0.859763	727.562	1.955	0.285671
Cal508950W	orf19.1287	0.966136	1.00845	12558.2	0.0122215	0.773319	591.411	1.9545	1.35835
Cal219650W	orf19.3601	0.867291	1.00288	10565.6	0.0133016	0.786694	620.604	1.9525	2.05415
CalR14870W	orf19.699	0.00343823	0.889643	290.303	0.137626	1.01383	2538.86	1.952	NaN
Cal509940W	orf19.3931	0.985335	1.00759	13233.2	0.0124527	0.781126	597.51	1.948	0.972979
CalR10870W	orf19.6309	0.980939	1.00764	13049.7	0.0010911	0.405385	156.806	1.948	1.53159
Cal214770W	orf19.35	0.993359	1.00466	13653	0.0119462	0.772768	583.933	1.945	0.574171
Cal601680C	orf19.3642	0.999226	1.00165	14207	0.00273154	0.465647	256.616	1.936	0.115965
Cal702990W	orf19.6588,orf19.6587	0.99821	1.0025	14062.3	0.00679572	0.665338	423.308	1.9355	0.0714178
Cal109800W	orf19.1070	0.190487	0.995729	3137.57	0.00726915	0.679548	439.72	1.9335	4.24618
Cal108840C	orf19.4468	0.994084	1.00455	13701.7	0.0145059	0.805326	652.112	1.925	0.261629
Cal105060W	orf19.3685	0.981894	1.00784	13087.7	0.0132043	0.787366	618.102	1.9245	1.02743
Cal220100C	orf19.215	0.990658	1.00635	13489.3	0.0225445	0.873449	841.411	1.923	NaN
CalR21400C	orf19.6602	0.984346	1.008	13189.9	0.0132981	0.789713	620.542	1.922	0.957423
Cal310490W	orf19.5919	0.921968	1.00688	11521	0.0142567	0.800698	645.909	1.9215	1.71473
Cal700870W	orf19.7080	0.99791	1.00262	14026	0.00801104	0.699277	464.973	1.92	NaN
Cal403060W	orf19.4650	0.974162	1.0079	12806.4	0.0129248	0.777095	610.277	1.9195	1.18865
Cal217100W	orf19.1862	0.99442	1.00419	13724.9	0.0178551	0.8624	735.802	1.9175	0.132229
CalR09750C	orf19.524	0.986598	1.00774	13288.1	0.0210276	0.863144	808.293	1.917	1.23744
Cal132590W	orf19.7231	0.987117	1.00735	13312.7	0.0135721	0.780397	628.331	1.9125	0.850649
Cal214230C	orf19.17	0.975769	1.00769	12861.3	0.0134203	0.780964	623.965	1.909	1.14268
CalR12110W	orf19.5286	0.016795	0.925323	710.259	0.145221	1.01802	2628.59	1.908	NaN
Cal505210W	orf19.4246	0.991526	1.00597	13539.1	0.0133485	0.78626	621.729	1.905	0.640639
Cal309670W	orf19.5867	0.978807	1.0081	12971.7	0.0142374	0.805859	645.219	1.8955	1.0543
Cal223430W	orf19.1742	0.993121	1.0047	13639.2	0.0191877	0.850245	766.687	1.894	NaN
Cal212160W	orf19.3572	0.993551	1.0045	13666.3	0.014187	0.806157	643.848	1.891	0.404465
Cal216170W	orf19.2277	0.99041	1.00645	13475.8	0.0236349	0.875882	865.086	1.888	NaN
Cal130630W	orf19.4963	0.993921	1.00453	13690.5	0.0198585	0.858955	781.757	1.8875	0.183141
Cal602800W	orf19.137	0.996376	1.00393	13875	0.0126653	0.771092	603.389	1.886	NaN
Cal707130W	orf19.5126	0.995254	1.00433	13784.2	0.01253	0.775897	599.649	1.884	0.663266
Cal407060C	orf19.2672	0.988342	1.00732	13369.6	0.0147874	0.811629	658.988	1.881	0.75519
CalR10980C	orf19.6306,orf19.6305	0.989564	1.00644	13431.5	0.00150863	0.465106	185.631	1.88	1.1837
Cal107520W	orf19.3037	0.993486	1.00458	13662.3	0.0189048	0.864132	760.411	1.877	NaN
Cal305300W	orf19.1618.1	0.978734	1.00809	12968.8	0.0154279	0.824908	675.648	1.8745	1.02318
Cal113510C	orf19.2445	0.987394	1.00735	13325.4	0.0150483	0.813619	665.757	1.874	0.779232
CalR14730W	snR5d	0.996017	1.00419	13844.7	0.0113658	0.762454	567.666	1.8665	0.522552
Cal118390C	orf19.5081	0.981315	1.00781	13064.6	0.0452022	0.950624	1271.51	1.866	1.16248
Cal305250W	orf19.1620	0.99131	1.00603	13525.4	0.00197032	0.453175	214.767	1.865	1.05076
Cal101870W	orf19.6020	0.992692	1.00525	13609.5	0.0243747	0.880773	881.364	1.8645	0.433456
Cal306550W	orf19.272	0.69185	1.00089	8278.39	0.0652264	1.00332	1589.08	1.8625	2.94086
Cal602790C	orf19.137	0.991864	1.00589	13558.1	0.00197792	0.440923	215.309	1.858	0.991364
CalR05590W	orf19.173	0.979431	1.00795	12993.1	0.0221856	0.878333	833.883	1.856	1.36754
Cal128770W	orf19.3762	0.987839	1.00709	13346	0.0158061	0.826823	685.051	1.855	0.731148
Cal206720W	orf19.5801	0.993535	1.00456	13665.5	0.0209979	0.864375	807.719	1.8475	0.164756
CalR14710W	orf19.695	0.988257	1.00731	13365.7	0.0160014	0.831039	690.136	1.847	0.702864
Cal109300C	orf19.1048	0.927407	1.00743	11630.5	0.086913	1.01726	1898.33	1.847	1.90919
Cal128610W	orf19.68.2	0.993447	1.00461	13658.8	0.0170028	0.843733	715.337	1.8465	0.228395
Cal131210W	orf19.4997	0.91267	1.00651	11341.8	0.0160573	0.830964	691.553	1.846	1.67019
Cal406840W	orf19.2684	0.284421	0.999336	4125.16	0.0586605	0.980381	1490.5	1.846	NaN
Cal708210W	orf19.5504	0.663437	1.00023	7961.3	0.0651152	1.00481	1587.46	1.846	NaN
Cal510880W	orf19.3976	0.841425	1.00331	10175.2	0.0163975	0.839576	699.979	1.8445	2.00889
Cal604570C	orf19.3504	0.986937	1.00745	13303.9	0.00185438	0.463276	207.266	1.8435	1.22259
Cal603610W	orf19.3423	0.996137	1.00404	13855.1	0.0135542	0.78247	627.662	1.84	NaN
Cal223150C	orf19.1754	0.991881	1.00583	13559	0.0264672	0.889814	924.923	1.8395	0.576292
Cal204340W	orf19.1515:orf19.1516	0.986182	1.00767	13269.6	0.0165266	0.83439	703.586	1.8365	0.764382
Cal109560W	orf19.1059,orf19.1061	0.990419	1.00639	13476.3	0.0305562	0.896275	1005.11	1.836	0.654781
Cal508780W	orf19.3214	0.995957	1.00434	13839.1	0.0141084	0.804843	641.888	1.836	NaN
Cal206950C	orf19.5785	0.308831	0.997984	4370.55	0.00953209	0.730794	513.245	1.832	3.59493
Cal511120C	orf19.3990	0.997598	1.00307	13988.3	0.00357695	0.539896	296.324	1.832	0.418607
Cal501590W	orf19.570	0.780236	1.00076	9337.55	0.0164003	0.836761	700.071	1.8285	2.21961
CalR13850W	snR61	0.991271	1.00606	13523.2	0.0164686	0.837298	702.256	1.827	0.514774
Cal507010W	orf19.4349	0.989533	1.00648	13429.9	0.0166674	0.835675	706.508	1.827	0.608112
Cal303720W	orf19.1682	0.928034	1.00736	11643.2	0.0920304	1.01101	1967.24	1.8265	1.8604
Cal132270C	orf19.7215.3	0.993151	1.00466	13641.2	0.0222484	0.876033	835.464	1.823	0.172534
Cal209550W	orf19.794	0.990769	1.00626	13494.8	0.0291346	0.896306	978.767	1.8165	0.644174
Cal701980C	orf19.7022	0.997636	1.00283	13993	0.0086294	0.722775	484.613	1.8155	0.0417193
Cal112290W	orf19.419,orf19.418	0.992707	1.00519	13610.6	0.0175832	0.860743	729.315	1.8105	0.316077
Cal505440W	orf19.4261	0.997358	1.00338	13964.9	0.00891304	0.721508	493.542	1.81	0.428507
Cal502760W	orf19.1944	0.998547	1.00235	14101.8	0.00460248	0.565169	339.963	1.809	NaN
Cal602560W	orf19.124	0.969748	1.00888	12665.3	0.0188123	0.868121	758.321	1.801	1.07763
CalR01430W	orf19.7475	0.997282	1.00338	13958.1	0.00697861	0.669669	429.628	1.801	0.322441
Cal313310C	orf19.7358	0.997439	1.00332	13972.5	0.00968875	0.735026	518.494	1.7995	0.0883883
Cal405300W	orf19.2765	0.962037	1.0078	12442.3	0.0190504	0.859938	763.557	1.7995	1.18158
Cal302270C	orf19.2506	0.992436	1.00555	13593	0.0224838	0.87814	839.985	1.799	NaN
Cal700880C	orf19.7079	0.971619	1.00872	12724.2	0.0298606	0.895818	991.9	1.7975	1.43048
Cal202560C	orf19.2002	0.92231	1.0068	11527.5	0.0176998	0.860638	732.197	1.795	1.53159
Cal608420W	orf19.5750	0.997716	1.0027	14001.7	0.00853692	0.719186	481.731	1.795	0.0212132
Cal119980W	orf19.4737	0.988723	1.00686	13389.9	0.0333596	0.908609	1059.56	1.7935	0.747412
Cal122960C	orf19.4871	0.994179	1.00437	13708.8	0.0188827	0.868603	759.974	1.793	NaN
Cal409910W	orf19.1409.3	0.995965	1.00428	13840	0.00371981	0.533663	302.371	1.7925	0.631446
Cal403120W	orf19.4647	0.990722	1.00635	13492.5	0.0180276	0.856459	740.054	1.792	0.480833
Cal220010C	orf19.217	0.992646	1.00541	13607	0.0241173	0.87365	875.652	1.788	0.220617
Cal313420W	orf19.7362	0.990009	1.00654	13454.3	0.0184472	0.862258	749.841	1.7865	0.50841
Cal311780W	orf19.5992	0.998178	1.00254	14057.9	0.00594962	0.62927	393.17	1.786	NaN
Cal118750W	orf19.5104	0.992722	1.00507	13612.3	0.0236915	0.873511	866.441	1.7855	0.183141
Cal129250W	orf19.6344	0.97785	1.00797	12936	0.0197012	0.857267	778.302	1.7845	0.900147
Cal510560W	orf19.3959	0.997812	1.00266	14013	0.00838302	0.714529	477.058	1.7835	0.129401
Cal303970W	orf19.1673	0.974617	1.00779	12821.6	0.0200255	0.855959	785.668	1.779	0.961665
Cal204630C	orf19.1530	0.990408	1.00652	13475.6	0.0190738	0.855666	764.183	1.7765	0.465983
Cal313470C	orf19.7363	0.960193	1.00776	12392.2	0.0199689	0.861161	784.219	1.7765	1.17026
Cal202450W	orf19.2006.1	0.992326	1.00558	13586	0.0191732	0.852209	766.455	1.7745	0.287793
CalR23670W	orf19.7655	0.992073	1.00575	13570.8	0.0189807	0.862163	762.181	1.773	0.33234
Cal119050C	orf19.382	0.992989	1.00499	13630.2	0.0199834	0.856686	784.602	1.769	0.140007
Cal316520W	orf19.6793	0.997522	1.00327	13980.5	0.00902485	0.718516	497.324	1.767	NaN
Cal507680C	orf19.6659	0.990785	1.0062	13496.3	0.0192733	0.851433	769.077	1.766	0.425678
Cal605340W	LSU-C2809	0.981519	1.00788	13072.9	0.0204279	0.862974	794.794	1.7655	0.785596
Cal412120W	orf19.1795	0.998073	1.0025	14044.7	0.00469841	0.558033	344.343	1.7615	0.127986
Cal100980W	orf19.6062.3:orf19.6062	0.973378	1.00795	12781.2	0.0210883	0.860761	809.518	1.759	0.95318
Cal108500W	orf19.1031	0.992455	1.0055	13594.3	0.0206501	0.862305	799.645	1.7575	0.174655
Cal129090W	orf19.6351	0.982943	1.00799	13130.7	0.0447315	0.94899	1263.58	1.757	0.881055
Cal705020W	orf19.6482	0.996479	1.00389	13882.5	0.0110007	0.751887	557.638	1.757	0.265872
Cal114020W	orf19.1827	0.962617	1.00797	12457.6	0.0212077	0.860784	812.358	1.7555	1.10945
Cal510740W	orf19.3967	0.996109	1.00415	13852.8	0.00441477	0.571161	332.107	1.7545	0.548008
Cal602640W	orf19.131.2	0.974482	1.00787	12817	0.00212146	0.439143	224.214	1.752	1.393
Cal211960W	orf19.3561	0.958326	1.00829	12343.1	0.0716349	0.99999	1683.58	1.7505	1.4432
Cal408280W	orf19.1310	0.998914	1.00203	14155.1	0.000598344	0.333462	116.293	1.747	NaN
Cal606580W	orf19.5575	0.995388	1.00419	13794.4	0.0161774	0.831241	694.593	1.743	NaN
Cal101120W	orf19.6055	0.988771	1.00684	13392.7	0.0212636	0.860642	813.591	1.7405	0.478711
Cal210380W	orf19.4490	0.987637	1.00745	13336.6	0.0210842	0.863023	809.358	1.7395	0.536694
Cal508720W	orf19.3216	0.995262	1.00427	13784.9	0.0165307	0.831701	703.775	1.739	NaN
Cal112420W	orf19.413.1	0.989529	1.00655	13429.5	0.0320428	0.903307	1034.12	1.735	0.612354
Cal413520C	orf19.4414	0.992793	1.00486	13617.1	0.00456246	0.57487	338.098	1.7345	0.812466
Cal102750W	orf19.3315	0.9885	1.00713	13378.3	0.0349365	0.908851	1089.8	1.7335	0.634275
CalR11160C	orf19.1808	0.95997	1.00775	12386.5	0.022824	0.870316	847.669	1.732	1.1045
Cal129030C	orf19.6354	0.978177	1.00788	12948	0.0227246	0.873422	845.369	1.73	0.804688
Cal300900C	orf19.5423	0.991919	1.0058	13561.5	0.0236115	0.877256	864.477	1.7285	0.0968737
Cal705050C	orf19.6480	0.996963	1.00375	13928.6	0.0108516	0.755962	552.85	1.728	NaN
Cal214240W	orf19.17	0.406309	0.990981	5335.15	0.0148992	0.811617	662.02	1.7275	3.13743
Cal311060C	orf19.5953	0.996779	1.00371	13911.5	0.011784	0.769144	579.489	1.7185	0.122329
Cal204750C	orf19.1535	0.660287	1.00152	7926.89	0.0185983	0.866527	753.477	1.7175	2.43033
Cal410660W	orf19.3809	0.948151	1.00857	12086.1	0.00256936	0.443214	248.222	1.7175	1.67231
Cal412480W	orf19.1237	0.992127	1.00566	13574	0.00463423	0.564286	341.596	1.715	0.875398
Cal218620C	orf19.1351	0.991653	1.00595	13546.6	0.0240311	0.877103	873.608	1.7145	0.116673
Cal124020W	orf19.984	0.987724	1.00733	13340.7	0.0355431	0.914778	1101.08	1.7135	0.683772
Cal129970W	orf19.4934	0.95375	1.0086	12222.8	0.0236446	0.874005	865.379	1.7135	1.14339
Cal210500W	orf19.145	0.961634	1.0076	12431.5	0.0240421	0.875301	873.824	1.712	1.05359
Cal124410W	orf19.1005	0.590709	0.99876	7184.16	0.0179779	0.862583	738.817	1.7115	2.61276
Cal310830W	orf19.5938	0.985687	1.00766	13249.2	0.0233437	0.876295	858.855	1.711	0.5572
Cal132990W	orf19.7257:orf19.7258,orf19.7256	0.991606	1.00598	13543.6	0.0237971	0.872962	868.744	1.7105	0.137886
Cal503920W	orf19.3197	0.997694	1.00275	13999.2	0.0056577	0.630615	381.984	1.7085	0.1393
Cal607620W	orf19.5629	0.996665	1.00366	13899.5	0.0122188	0.776535	591.368	1.701	0.149907
Cal202070C	orf19.2023	0.979948	1.00813	13012.1	0.0493237	0.955481	1340.83	1.6975	0.938331
CalR09190W	orf19.489:orf19.490	0.984404	1.00784	13192.3	0.0244907	0.882761	883.846	1.695	0.572756
CalR16960W	orf19.2623	0.914937	1.00672	11384.9	0.0231994	0.875417	855.595	1.6925	1.43048
Cal205240C	orf19.1562	0.988368	1.00728	13371	0.0344576	0.9078	1081.08	1.6915	0.613062
Cal222330C	orf19.1358	0.953135	1.00854	12206.4	0.0256425	0.893173	908.179	1.6855	1.10804
Cal314040W	orf19.7385	0.985905	1.00767	13258.2	0.0223154	0.876287	836.659	1.685	0.923481
Cal100340W	orf19.6091	0.991104	1.00624	13513.5	0.0264424	0.891046	924.352	1.681	0.0636396
Cal403200W	orf19.4643	0.691812	1.00103	8277.89	0.0204638	0.859478	795.717	1.681	2.28961
Cal218800W	orf19.1434,orf19.1433	0.947515	1.009	12071.4	0.075764	1.00075	1743.36	1.6805	1.48563
Cal304950W	orf19.1633	0.991017	1.00629	13508.2	0.0287647	0.894421	971.236	1.6805	0.150614
Cal101570W	orf19.6033	0.991014	1.00636	13508	0.0259696	0.895952	914.716	1.6795	0.11243
Cal215380W	orf19.2237.1	0.98897	1.00683	13402	0.0345017	0.907314	1081.92	1.679	0.473762
Cal111180W	orf19.48	0.844933	1.0032	10227.1	0.0225438	0.878118	841.399	1.6785	1.75857
Cal402700W	tS(UGA)3	0.961469	1.00772	12426.9	0.0260276	0.891584	915.875	1.6745	0.999142
Cal107860W	orf19.3052	0.956643	1.00805	12297.9	0.0266756	0.890622	929.529	1.6725	1.05005
Cal219580W	orf19.3605	0.977361	1.00783	12918.1	0.0264313	0.894836	924.164	1.6695	0.72337
CalR15150C	orf19.1857,orf19.1856	0.583481	0.997715	7108.9	0.0187026	0.865815	755.997	1.6635	2.55902
Cal601940W	orf19.92	0.903178	1.00585	11167.9	0.024864	0.887389	891.557	1.6625	1.45452
Cal108730C	orf19.4463	0.98666	1.00759	13291.4	0.0392277	0.936425	1167.97	1.659	0.602455
Cal608170W	orf19.5734	0.994324	1.00438	13718.7	0.014597	0.80729	654.158	1.6565	0.413658
CalR14680W	orf19.693	0.988605	1.00688	13383.6	0.0263996	0.895855	923.458	1.656	0.309713
Cal315330W	orf19.7446	0.980097	1.00799	13018.2	0.027597	0.888622	948.304	1.654	0.630739
Cal114340C	orf19.6275	0.979441	1.00789	12993.5	0.0278544	0.889009	953.374	1.651	0.640639
CalR22590C	orf19.7588	0.970832	1.00863	12699.4	0.0277012	0.888031	950.351	1.651	0.823072
CalR07310W	orf19.2397.3	0.898077	1.00589	11078	0.0259924	0.892488	915.095	1.65	1.4623
Cal703850W	orf19.6541	0.939498	1.00854	11887.5	0.04151	0.933975	1207.89	1.6495	1.6016
Cal707970W	orf19.6693	0.995459	1.00398	13799.5	0.0151919	0.815296	669.876	1.649	0.118794
Cal120260W	orf19.4752	0.993094	1.00495	13637.1	0.0228088	0.872032	847.201	1.646	NaN
Cal704280W	orf19.6524	0.986391	1.00774	13278.9	0.0272995	0.886928	942.318	1.645	0.403051
Cal303870W	orf19.1676	0.990649	1.00642	13489	0.029176	0.893784	979.586	1.6395	0.0445477
Cal604690W	orf19.3496	0.971242	1.00862	12712.6	0.0285024	0.893939	966.283	1.6375	0.796909
Cal207930W	orf19.868	0.962504	1.008	12454.4	0.0291194	0.897745	978.5	1.636	0.920653
Cal507730W	orf19.6661	0.99613	1.0041	13854.5	0.00657902	0.671338	415.572	1.634	0.33234
Cal116760W	orf19.4430	0.972688	1.00788	12759	0.058579	0.98015	1489.34	1.634	1.0253
Cal708410C	orf19.7199:orf19.7198	0.989336	1.00685	13420.3	0.0146522	0.807262	655.661	1.632	0.742462
Cal100460W	orf19.6082	0.990063	1.00653	13457.6	0.0317032	0.900745	1027.44	1.6305	0.168998
Cal103250W	orf19.3337	0.988458	1.00723	13376	0.0286246	0.893901	968.757	1.63	0.254558
Cal507260W	orf19.2649	0.964255	1.0083	12504.5	0.0296611	0.897265	988.251	1.6275	0.884591
Cal212020W	orf19.3564	0.797504	0.999812	9564.57	0.189738	1.02893	3129.72	1.626	NaN
CalR20670W	orf19.7322	0.989841	1.00651	13446	0.0322126	0.904574	1037.41	1.626	0.159806
Cal108830W	orf19.4467	0.989451	1.00675	13425.9	0.033608	0.910243	1064.21	1.625	0.258801
Cal204500W	snR48	0.989484	1.00664	13427.5	0.0335562	0.910543	1063.24	1.624	0.268701
CalR06030W	orf19.2826,orf19.2827	0.764037	1.00225	9132.78	0.024089	0.874812	874.986	1.6225	1.98485
Cal306280C	orf19.261	0.970235	1.00881	12680.9	0.0302146	0.895317	998.64	1.6175	0.778524
Cal205610W	orf19.1582	0.985252	1.00757	13229.7	0.0295839	0.896799	986.711	1.6165	0.392444
Cal130320W	orf19.4952	0.988164	1.00728	13361.6	0.0368703	0.919535	1124.83	1.6155	0.393859
CalR02690W	orf19.3235	0.986628	1.0077	13289.6	0.0302429	0.894327	999.137	1.6105	0.31042
Cal111010W	orf19.756	0.971854	1.00861	12731.9	0.0567854	0.9726	1461.63	1.6095	1.0246
Cal115070W	orf19.6244	0.867426	1.00295	10567.8	0.112295	1.0157	2228.76	1.6095	1.93394
Cal312130W	orf19.6008	0.974565	1.00781	12819.9	0.0215983	0.866925	820.952	1.6075	1.13491
Cal108710W	orf19.4461	0.972886	1.00787	12765.5	0.0315314	0.902945	1024.33	1.6055	0.710642
Cal206580W	orf19.5808	0.987737	1.0072	13341.5	0.0311242	0.898386	1016.23	1.6045	0.226981
Cal215250W	orf19.2230	0.988876	1.00687	13397.3	0.0310801	0.9007	1015.31	1.604	0.138593
Cal112550W	tN(GUU)2	0.989405	1.00685	13423.5	0.0327288	0.912	1047.45	1.604	0.0678822
CalR07230W	orf19.2400	0.869638	1.00391	10602.9	0.048011	0.956919	1318.9	1.602	1.97707
Cal103700W	orf19.3360	0.988543	1.00703	13381	0.0360138	0.923611	1109.42	1.6015	0.266579
Cal209830W	orf19.4516,orf19.4515	0.985418	1.0076	13237.3	0.0422981	0.938591	1221.74	1.6015	0.555079
Cal605030W	orf19.3467	0.970234	1.00888	12680.8	0.0316756	0.901729	1027.04	1.6	0.749533
CalR08840W	orf19.467	0.84145	1.00326	10175.7	0.0427654	0.934646	1230.19	1.6	2.09304
CalR15180W	orf19.1855	0.985629	1.00767	13246.4	0.0312346	0.899781	1018.66	1.599	0.330926
Cal304190W	orf19.1666	0.932268	1.00765	11732.2	0.031599	0.903097	1025.68	1.5985	1.16602
Cal704450W	orf19.6514	0.979021	1.00817	12979	0.0320248	0.904561	1033.86	1.5985	0.555079
Cal313380W	orf19.7360:orf19.7361	0.948097	1.00866	12084.9	0.0392954	0.934959	1169.13	1.598	1.45098
Cal701920W	orf19.7027	0.994079	1.00462	13701.3	0.0155176	0.823626	677.805	1.598	0.336583
Cal202890W	orf19.1989	0.981558	1.00778	13074.4	0.0314596	0.902673	1022.93	1.5975	0.490025
CalR02490W	orf19.3248	0.974358	1.00788	12812.8	0.0217571	0.866099	824.42	1.5975	1.12359
CalR17630C	orf19.3708	0.944165	1.0087	11993.9	0.0328316	0.909618	1049.59	1.591	1.04793
Cal408470W	orf19.1301	0.85217	1.00357	10334.2	0.0278785	0.887824	953.989	1.5895	1.6016
Cal110810C	orf19.764	0.980248	1.00779	13023.8	0.0477046	0.960056	1313.76	1.588	0.786303
CalR02840W	orf19.3230	0.960317	1.00775	12395.3	0.032695	0.912813	1046.82	1.5855	0.873277
Cal511060C	orf19.3986	0.858286	1.00311	10425.7	0.029058	0.899679	977.079	1.584	1.56553
Cal603390W	orf19.3432.1,snR189d	0.983346	1.00797	13147.6	0.007	0.667303	430.202	1.5835	0.941159
Cal407500W	orf19.3364	0.807092	1.00101	9693.98	0.0271663	0.886577	939.742	1.582	1.7706
Cal317440C	orf19.6741	0.979335	1.00792	12990.2	0.0331153	0.90707	1054.92	1.58	0.517602
Cal409940W	orf19.3846	0.986761	1.00762	13296.5	0.0337308	0.911866	1066.44	1.578	0.207889
Cal205310C	orf19.1565	0.980069	1.00811	13016.7	0.033314	0.909077	1058.83	1.5775	0.495682
Cal202950C	orf19.1442	0.986864	1.00759	13300.5	0.0338371	0.909648	1068.53	1.577	0.199404
CalR20990W	orf19.7337	0.987668	1.00734	13338	0.0384092	0.929132	1152.99	1.5765	0.293449
Cal220850C	orf19.4088	0.980741	1.00758	13041.7	0.0333112	0.910717	1058.76	1.575	0.470933
Cal302690W	orf19.3159	0.95325	1.00859	12209.5	0.0339475	0.909242	1070.91	1.5745	0.935502
Cal210410W	snR189b	0.98645	1.00766	13281.3	0.0340807	0.907776	1073.52	1.5735	0.217082
Cal108810C	orf19.4466	0.9886	1.00695	13383.4	0.0350842	0.909428	1092.49	1.5715	0.0912168
Cal223100C	orf19.1756	0.972333	1.00802	12747.3	0.0340718	0.909208	1073.3	1.5705	0.662559
Cal101840W	orf19.6021	0.937008	1.00886	11832.9	0.0340552	0.910443	1072.97	1.57	1.08187
Cal414470W	orf19.2886	0.98284	1.00809	13125.9	0.0343554	0.910073	1079.2	1.5635	0.376888
Cal223530W	orf19.5316	0.984822	1.00749	13210.8	0.0438944	0.945067	1249.39	1.5635	0.511238
Cal606910W	orf19.5595	0.982863	1.00798	13127.1	0.034784	0.908144	1086.97	1.5635	0.368403
Cal122950W	orf19.4871	0.987016	1.00739	13307.7	0.0398889	0.936775	1179.42	1.56	0.354968
Cal507450W	orf19.2639.1	0.957335	1.00827	12316.6	0.00490062	0.577317	352.136	1.557	1.35199
Cal123920W	orf19.4909.1	0.986869	1.00752	13300.7	0.0402761	0.936758	1186.52	1.557	0.354968
Cal125890W	orf19.676	0.981329	1.00776	13065.1	0.0498012	0.957056	1348.7	1.556	0.632154
Cal111640W	orf19.450	0.987751	1.00714	13342.2	0.0379841	0.934448	1145.24	1.5545	0.19304
Cal214150W	orf19.5498	0.984043	1.0079	13175.8	0.0360373	0.922579	1109.9	1.554	0.295571
Cal706500W	orf19.5159:orf19.5158	0.858457	1.00323	10428.4	0.0327384	0.910518	1047.65	1.553	1.51887
Cal206440W	orf19.5814.1	0.984921	1.00752	13215.3	0.0363623	0.921136	1115.89	1.5525	0.239709
Cal310660W	orf19.5928	0.994384	1.0043	13722.8	0.0190524	0.85736	763.61	1.552	0.0226274
CalR14740W	snR5d	0.994395	1.00424	13723.3	0.0190366	0.862	763.267	1.552	0.0226274
Cal212120C	orf19.3569	0.979577	1.00789	12998.8	0.0361015	0.922593	1111.14	1.548	0.451134
Cal610360W	orf19.2160	0.82969	1.00285	10008	0.0613809	0.998216	1531.76	1.5465	2.05415
Cal114640W	orf19.6264.3	0.987756	1.00708	13342.6	0.036833	0.92019	1124.31	1.541	0.039598
Cal510860W	orf19.3974	0.994108	1.00451	13703.5	0.0167847	0.838655	709.915	1.54	0.210718
Cal401760C	orf19.4160:orf19.4159	0.988515	1.00707	13379.1	0.00881642	0.73	490.271	1.5395	0.704986
Cal700940C	orf19.7076	0.982184	1.00785	13099.1	0.0380945	0.933993	1147.4	1.538	0.329512
Cal128010W	orf19.5244	0.946124	1.00915	12038.9	0.0370028	0.919674	1127.46	1.5375	0.952473
Cal204950W	orf19.1543	0.553887	0.994403	6804.72	0.0235328	0.876581	862.871	1.5345	2.46144
Cal500850C	orf19.949	0.99385	1.00453	13685.6	0.0193672	0.850394	771.208	1.533	0.131522
Cal105300C	orf19.2927	0.879782	1.00473	10766.2	0.0363458	0.922329	1115.65	1.5305	1.38098
CalR17680W	orf19.3711	0.986861	1.00765	13300.4	0.0404741	0.938352	1189.55	1.5305	0.221324
Cal220930C	orf19.4091	0.976789	1.00767	12897.1	0.0524044	0.96119	1391.25	1.5285	0.795495
Cal707480W	orf19.1334	0.967232	1.0085	12590.5	0.0385908	0.92887	1156.38	1.528	0.675994
Cal703300C	orf19.6574	0.992637	1.00547	13606.4	0.0180552	0.852182	740.783	1.5275	0.351432
Cal209900W	orf19.4511	0.880792	1.00486	10782.7	0.0365307	0.920574	1119.08	1.527	1.37037
CalR03040W	orf19.3222	0.583943	0.997564	7113.63	0.0253423	0.895634	901.44	1.527	2.36598
Cal500140C	orf19.5692	0.98296	1.00786	13131.6	0.00884196	0.719775	491.072	1.527	0.865499
CalR11440W	tH(GUG)1	0.925228	1.00695	11586.4	0.037842	0.932534	1142.46	1.5245	1.10945
Cal128050C	orf19.5242	0.992068	1.00581	13570.5	0.0262484	0.894918	920.451	1.524	NaN
Cal129220W	orf19.6345	0.987271	1.00729	13320	0.0383623	0.929548	1152.18	1.5235	0.0643467
Cal300650W	orf19.5437	0.955943	1.0079	12279.9	0.0395908	0.938903	1174.16	1.5215	0.818122
Cal502320C	orf19.1967,orf19.1966	0.949455	1.00803	12117.7	0.00614631	0.640719	400.355	1.5215	1.37532
Cal124630W	orf19.1837	0.987176	1.00727	13315.5	0.0382602	0.933316	1150.44	1.5205	0.0304057
Cal311930W	orf19.6000	0.986211	1.00763	13270.9	0.0383299	0.930318	1151.69	1.52	0.0820243
Cal405270W	orf19.2767	0.976649	1.00781	12892.3	0.0391732	0.938215	1166.97	1.52	0.470933
CalR08240W	orf19.4365	0.993313	1.00468	13650.5	0.0142443	0.803113	645.542	1.52	0.34224
Cal509610W	orf19.3914	0.940778	1.00842	11915.8	0.0385894	0.930383	1156.34	1.5185	0.969443
CalR22100C	orf19.7564	0.975893	1.0076	12865.9	0.0560663	0.968296	1450.06	1.5185	0.778525
Cal609050W	orf19.1215,orf19.1214	0.895481	1.0064	11032	0.0377143	0.930971	1140.24	1.5175	1.27916
Cal301700C	orf19.5378	0.97494	1.00777	12832.6	0.0575956	0.976094	1474.02	1.5165	0.795495
Cal303140C	orf19.1712	0.975163	1.00771	12840.4	0.0397985	0.939218	1177.88	1.513	0.494975
Cal200800W	orf19.2091	0.941014	1.0083	11920.9	0.0852167	1.01295	1875.32	1.512	1.30249
Cal205270C	orf19.1563	0.984821	1.00756	13210.8	0.0397564	0.939755	1177.21	1.512	0.140007
CalR20340W	orf19.7305	0.975322	1.0078	12846.1	0.040185	0.939161	1185.06	1.5105	0.485782
Cal200740C	orf19.2093	0.907795	1.00619	11252.1	0.103475	1.00967	2116.35	1.51	1.55988
Cal113390W	orf19.2451	0.980576	1.00777	13035.9	0.0408668	0.932535	1196.74	1.5095	0.330219
Cal109900W	orf19.5198	0.98664	1.00764	13290.4	0.0406894	0.931422	1193.78	1.5065	0.135057
Cal701370W	orf19.7051	0.969307	1.00878	12651.8	0.0402588	0.939372	1186.26	1.506	0.606698
CalR03410C	orf19.2533.1	0.992734	1.00501	13613.1	0.0149482	0.811236	663.337	1.504	0.35921
CalR10640W	orf19.6316.4	0.966031	1.00856	12555.1	0.0408427	0.933454	1196.32	1.504	0.653367
CalR08710W	orf19.4355	0.750216	1.00301	8963.81	0.0302126	0.89709	998.567	1.5025	1.85474
Cal704860W	orf19.6489	0.881115	1.00483	10787.7	0.0547026	0.965457	1428.18	1.5015	1.76847
CalR14400C	orf19.719	0.958402	1.00807	12345.2	0.0409683	0.93338	1198.49	1.5015	0.758726
Cal129880C	snR87:orf19.4931.1	0.917864	1.00642	11440.2	0.0401339	0.939483	1184.11	1.501	1.12289
Cal215570W	orf19.2247	0.96905	1.00902	12644.2	0.041207	0.935878	1202.55	1.4995	0.597505
Cal222620C	orf19.1776	0.300772	1.0005	4290.31	0.0186121	0.864391	753.877	1.498	3.1537
Cal312220C	orf19.6970	0.781644	1.00089	9355.53	0.031773	0.899199	1028.66	1.4975	1.73878
CalR21560C	orf19.6597	0.973251	1.00796	12777.1	0.0415652	0.933767	1208.89	1.4975	0.509824
Cal207390W	orf19.903	0.968117	1.00877	12616.2	0.0617143	1.00139	1536.62	1.497	0.929138
Cal105990W	orf19.2958	0.984811	1.00762	13210.4	0.0456708	0.953559	1279.54	1.496	0.298399
Cal111580W	orf19.4056	0.968406	1.00886	12625.3	0.0418875	0.938099	1214.81	1.493	0.596798
Cal407410W	orf19.1439	0.993364	1.0046	13653.4	0.021891	0.869041	827.462	1.493	0.0155563
Cal708370C	orf19.7200	0.982379	1.00798	13107.1	0.0424106	0.933936	1223.9	1.493	0.213546
Cal131490W	orf19.5010:orf19.5011	0.952443	1.00884	12189.8	0.0419745	0.93427	1216.27	1.4925	0.811052
Cal118550C	orf19.5095	0.984375	1.00796	13190.8	0.0464576	0.95215	1292.73	1.4915	0.344361
CalR05970W	orf19.2825	0.968379	1.00897	12624.5	0.0424203	0.932731	1224.06	1.4885	0.58902
Cal132050W	orf19.5035	0.951916	1.00872	12177.2	0.0425887	0.933601	1227.17	1.487	0.80893
Cal600630W	orf19.1192	0.98602	1.00758	13262.9	0.0102685	0.766959	535.94	1.487	0.711349
Cal510220W	orf19.3941	0.90487	1.0058	11197.9	0.0410097	0.932857	1199.19	1.486	1.18228
CalR05310W	orf19.3732	0.637137	1.00099	7674.06	0.155825	1.02678	2750.3	1.486	NaN
Cal205040C	orf19.1547	0.985838	1.00767	13255.4	0.0416529	0.934288	1210.62	1.4855	0.0318198
Cal220260W	orf19.206	0.973129	1.00791	12772.7	0.0430262	0.937519	1234.68	1.4845	0.488611
Cal316120W	orf19.6813	0.864555	1.00364	10522.5	0.0398247	0.938309	1178.32	1.4845	1.38805
Cal511950C	orf19.4040:orf19.4041	0.99323	1.00467	13645.8	0.0192781	0.849058	769.208	1.4835	0.17607
Cal502550C	snR189c	0.997205	1.00358	13950.4	0.00408696	0.548333	319.331	1.483	NaN
Cal501820W	orf19.583	0.985011	1.00747	13219.3	0.0104562	0.761357	541.365	1.4815	0.734684
Cal213080C	orf19.5204	0.949133	1.00806	12110	0.0433596	0.941949	1240.26	1.4805	0.825194
Cal127100W	orf19.1140	0.943839	1.00842	11986.5	0.0435887	0.941282	1244.33	1.48	0.878227
CalR00680W	orf19.7510	0.992553	1.00553	13600.6	0.0225714	0.87216	842.007	1.478	0.16122
CalR12570W	tC(GCA)1	0.992415	1.0056	13591.5	0.0225438	0.878118	841.399	1.4765	0.185969
CalR01290C	orf19.7483,orf19.7482	0.98296	1.00786	13131.6	0.0175852	0.857946	729.347	1.475	0.750947
Cal607580W	orf19.5628	0.980614	1.00774	13037	0.0107253	0.761814	549.281	1.4745	0.843578
Cal605440C	orf19.5513	0.989415	1.00679	13424.1	0.0106446	0.759803	547.284	1.4735	0.560736
Cal605680C	orf19.5525	0.984654	1.00781	13203.4	0.0433685	0.940734	1240.48	1.4735	0.0205061
Cal316670W	orf19.6788	0.969182	1.0088	12648.2	0.0327474	0.909023	1047.75	1.472	1.00975
CalR22020W	orf19.7557:orf19.7558	0.895814	1.00638	11037.6	0.042363	0.935732	1222.96	1.472	1.21057
Cal212870W	orf19.6884:orf19.6885	0.979269	1.008	12987.9	0.0546819	0.966268	1427.91	1.4715	0.566393
Cal104990W	orf19.3682	0.983738	1.0078	13163.8	0.0443858	0.947202	1257.38	1.4705	0.0685894
Cal406480C	orf19.2703	0.982447	1.00798	13109.8	0.0447371	0.947719	1263.66	1.4705	0.143543
CalR23370W	orf19.7631:orf19.7632	0.984399	1.00791	13191.9	0.0464686	0.948352	1292.9	1.469	0.308299
Cal122790C	orf19.4864	0.967478	1.00854	12597.5	0.065882	1.00276	1598.55	1.4685	0.87752
CalR14820W	snR66	0.948117	1.00861	12085.3	0.0446542	0.948739	1262.04	1.4685	0.816708
Cal316680W	orf19.6787	0.989202	1.00685	13413.3	0.0216805	0.867818	822.691	1.468	0.517602
Cal602960W	orf19.3447	0.96906	1.00896	12644.5	0.0451187	0.950247	1270.11	1.467	0.535987
Cal305690C	orf19.230:orf19.231	0.992708	1.00512	13610.8	0.0234092	0.876486	860.581	1.4665	0.0671752
Cal504180W	orf19.3184:orf19.3183	0.98305	1.00788	13135.1	0.0108454	0.759179	552.638	1.466	0.766504
Cal603510W	orf19.3428	0.992121	1.00573	13573.6	0.0235107	0.878015	862.315	1.466	0.176777
CalR23880C	orf19.7670	0.96287	1.00795	12465.1	0.0701429	0.999381	1661.19	1.465	0.957423
CalR12920W	orf19.6635	0.98284	1.00809	13125.9	0.0109724	0.753507	556.665	1.4625	0.768625
Cal314500W	orf19.7412	0.90476	1.00598	11195.8	0.0436149	0.940446	1244.7	1.4615	1.14481
Cal223900W	orf19.5343	0.943803	1.00853	11985.3	0.0453237	0.95042	1273.6	1.461	0.849942
Cal610330C	orf19.2158	0.896976	1.00605	11058.2	0.0520663	0.959847	1386.04	1.461	1.62776
Cal103370C	orf19.3345	0.938303	1.00853	11860.1	0.0462836	0.951277	1289.67	1.4555	0.890247
Cal219790W	orf19.3590	0.870304	1.00388	10614	0.0423775	0.934627	1223.36	1.4555	1.323
Cal131670C	orf19.5019	0.983903	1.0079	13170.5	0.048089	0.951926	1320.15	1.455	0.248902
Cal704410C	orf19.6515	0.95891	1.0081	12358.8	0.0464617	0.949549	1292.8	1.455	0.668923
Cal116590W	orf19.4438	0.965912	1.00873	12551.3	0.0676218	1.006	1624.69	1.4545	0.887419
Cal703860W	orf19.6541	0.98355	1.0079	13156	0.0460552	0.951983	1285.66	1.453	0.019799
Cal119270W	orf19.391,orf19.392	0.888413	1.00571	10910.2	0.0440952	0.947982	1252.61	1.452	1.22047
Cal215050W	orf19.3151	0.974128	1.00793	12805.2	0.0484831	0.95581	1326.68	1.451	0.384666
Cal511050W	orf19.3984	0.928803	1.00759	11659.3	0.0456784	0.952345	1279.64	1.451	0.965908
CalR10920W	orf19.6308	0.949458	1.00796	12117.8	0.0470939	0.957069	1303.63	1.451	0.774989
Cal128960C	orf19.6358	0.961303	1.00762	12422.3	0.0469793	0.956081	1301.48	1.4495	0.628618
Cal125070C	orf19.2330	0.984568	1.0078	13199.5	0.0460393	0.953014	1285.41	1.4485	0.122329
Cal120320W	snR190	0.984136	1.00793	13180	0.0475293	0.96053	1310.72	1.4475	0.204354
Cal408860W	orf19.789	0.991447	1.00603	13533.4	0.0222084	0.876839	834.496	1.446	0.267286
CalR21650W	orf19.6594	0.829587	1.0029	10006.5	0.0422181	0.938252	1220.46	1.4445	1.47715
Cal602840C	orf19.139	0.972374	1.00799	12748.9	0.0494148	0.955968	1342.2	1.4435	0.410829
Cal704700W	orf19.6496	0.905651	1.00574	11212.3	0.045501	0.951385	1276.59	1.4435	1.11511
Cal400650W	orf19.5660	0.991521	1.00603	13538.8	0.0214562	0.866017	817.528	1.443	0.268701
CalR19430W	orf19.6444	0.888943	1.0056	10919.1	0.111986	1.01608	2224.96	1.443	1.57826
Cal506070W	orf19.4295:orf19.4297	0.912799	1.00658	11344.2	0.0459338	0.953553	1283.62	1.442	1.06773
Cal508550W	orf19.1106	0.716959	1.00171	8568.15	0.2545	1.02238	3816.45	1.442	NaN
Cal217000C	orf19.1867	0.967462	1.0086	12597	0.0491642	0.954946	1338.37	1.442	0.514774
Cal408740W	orf19.5046	0.953768	1.00855	12223.2	0.0477792	0.956243	1314.95	1.4415	0.713471
Cal603580W	orf19.3425	0.959585	1.00771	12376.2	0.0480228	0.954527	1319.09	1.441	0.63781
Cal118770W	orf19.5105	0.981761	1.00777	13082.6	0.051891	0.959056	1383.05	1.4405	0.430628
Cal408770C	orf19.1596	0.953743	1.00867	12222.6	0.0481063	0.950969	1320.45	1.4405	0.710642
Cal413320W	orf19.4404	0.979558	1.00794	12998.1	0.0486411	0.953735	1329.21	1.44	0.190919
Cal223360C	orf19.1744	0.963478	1.00815	12481.7	0.0700407	1.00088	1659.67	1.439	0.909339
Cal317280C	orf19.6753	0.983518	1.008	13154.7	0.04753	0.959206	1310.74	1.437	0.0438406
Cal405730W	orf19.2747	0.979305	1.00796	12988.9	0.0498081	0.95592	1348.81	1.435	0.181019
Cal308090C	orf19.347	0.964729	1.00829	12517.8	0.0497329	0.959561	1347.62	1.4345	0.546594
Cal604360W	orf19.688	0.99131	1.00603	13525.4	0.0257412	0.892321	910.342	1.434	0.176777
CalR03670C	orf19.2551	0.98517	1.00756	13226.1	0.0204369	0.860843	795.017	1.4335	0.607405
Cal124530W	orf19.1833	0.965974	1.00857	12552.9	0.0681642	1.0058	1632.83	1.433	0.851357
CalR13490C	orf19.3854	0.965939	1.00868	12551.9	0.0109551	0.755905	555.978	1.433	1.05642
Cal403210C	orf19.4643	0.981937	1.00774	13089.5	0.0491422	0.957083	1337.99	1.4315	0.0431335
Cal501580W	orf19.568	0.972186	1.00808	12742.1	0.0513444	0.956272	1373.95	1.4305	0.388202
Cal204140C	orf19.1505	0.974166	1.00783	12806.6	0.0509593	0.956477	1366.87	1.429	0.337997
Cal207070C	orf19.5779	0.972081	1.00848	12738.7	0.0643285	1.00552	1575.71	1.4275	0.700743
Cal317430W	orf19.6741	0.984794	1.00767	13209.8	0.0256121	0.896425	907.476	1.4275	0.580535
Cal219100C	orf19.3626.1	0.973533	1.00797	12786.4	0.0513416	0.957452	1373.89	1.427	0.346482
Cal509250C	orf19.3898	0.972713	1.00784	12759.8	0.0514044	0.956162	1374.81	1.427	0.370524
Cal209770W	orf19.4519:orf19.4518	0.975847	1.0077	12864.1	0.0509551	0.957639	1366.67	1.4265	0.289207
Cal707090W	orf19.5130	0.978304	1.00794	12953	0.0503506	0.957454	1357.4	1.4265	0.208596
Cal204710W	orf19.1533	0.9645	1.00834	12511.6	0.0514375	0.955551	1375.46	1.4255	0.532451
CalR04320W	orf19.2597	0.937099	1.00873	11834.9	0.0498337	0.955145	1349.22	1.425	0.852771
Cal126240W	orf19.663	0.972552	1.00796	12754.8	0.0640966	1.00406	1572.58	1.4245	0.67953
Cal317940W	orf19.6713	0.995312	1.00418	13788.4	0.0125604	0.774468	600.39	1.423	NaN
Cal605470W	orf19.5514	0.656442	1.00083	7885.56	0.0324948	0.908977	1043.06	1.4225	2.0202
CalR03520C	orf19.2541	0.930247	1.00765	11689.7	0.0381311	0.933311	1148.1	1.4215	1.36118
CalR21240W	orf19.6612	0.955115	1.00828	12258.1	0.0504182	0.957484	1358.37	1.4215	0.665387
Cal302260W	orf19.2506	0.983072	1.00783	13135.8	0.0497647	0.957623	1348.1	1.421	0.115966
Cal315400C	orf19.7449	0.976673	1.00776	12893.1	0.0300518	0.897835	995.759	1.421	0.784888
Cal311030W	tK(CUU)2	0.991219	1.00608	13520.6	0.0268903	0.889589	934.081	1.4205	0.115258
Cal506310W	orf19.4309	0.96222	1.00792	12447	0.0516322	0.957939	1379.05	1.42	0.560029
Cal217980W	orf19.2179	0.959715	1.0077	12379.7	0.0512547	0.958297	1372.51	1.4195	0.594677
Cal311740W	orf19.5989	0.988561	1.00698	13381.7	0.0277308	0.88702	950.896	1.419	0.384666
Cal317020C	orf19.6770	0.975538	1.00781	12853.9	0.0305542	0.898032	1005.03	1.4185	0.805395
Cal224250W	orf19.5368	0.939618	1.0086	11890	0.0875424	1.01236	1906.78	1.4175	1.17592
Cal605230W	orf19.3476	0.982057	1.00779	13094.2	0.0506411	0.955456	1361.81	1.417	0.0240417
Cal702080W	orf19.7019	0.969957	1.00873	12671.8	0.0531808	0.952522	1403.79	1.417	0.408708
CalR06160W	orf19.2832	0.987394	1.00735	13325.5	0.019646	0.86003	777.006	1.417	0.504874
Cal115940W	orf19.6200	0.919329	1.0062	11468.9	0.0499689	0.955211	1351.36	1.416	0.98005
Cal215710W	orf19.2253	0.908264	1.00602	11260.4	0.0486756	0.953122	1329.86	1.416	1.05783
Cal406400W	orf19.2708	0.959883	1.00773	12383.9	0.0109199	0.757081	554.905	1.415	1.10733
Cal114110C	orf19.1824	0.734657	1.00228	8776.31	0.0382429	0.934469	1150.08	1.4145	1.77696
Cal602520W	orf19.123	0.898139	1.00588	11079.2	0.0485721	0.953672	1328.04	1.414	1.10874
Cal603850W	orf19.3414,orf19.3413	0.960888	1.00769	12410.8	0.0526032	0.959975	1394.36	1.414	0.565685
Cal504840C	orf19.4229	0.96087	1.00782	12410.3	0.011392	0.760691	568.331	1.4125	1.09107
CalR20280W	orf19.7303	0.598542	0.998719	7265.43	0.0312726	0.899087	1019.36	1.4125	2.16587
Cal708810W	orf19.7176:orf19.7175	0.854734	1.00341	10371	0.0441484	0.946317	1253.37	1.4115	1.78262
Cal505980W	orf19.4290	0.918462	1.00639	11451.5	0.0078461	0.693232	459.634	1.411	1.46795
Cal707700W	orf19.6707	0.989795	1.00654	13443.6	0.0275238	0.890223	946.809	1.41	0.257387
Cal402560W	orf19.4676:orf19.4675	0.989751	1.00656	13441.6	0.0246087	0.880444	886.149	1.4095	0.311834
Cal127520W	orf19.5271,orf19.5270	0.980061	1.00817	13016.3	0.0521304	0.959809	1386.91	1.409	0.0806102
Cal130040C	orf19.4939	0.957786	1.00801	12329.2	0.0528192	0.957885	1397.87	1.4075	0.598919
Cal405080W	orf19.2772	0.914193	1.00666	11370.6	0.0503209	0.958147	1356.87	1.407	1.00268
Cal112890C	orf19.2476	0.969522	1.00893	12658	0.0544272	0.968857	1423.72	1.4065	0.398101
Cal109430C	orf19.1054	0.980947	1.00758	13050	0.0523257	0.960963	1389.88	1.406	0.00989945
Cal705170W	orf19.6476	0.987127	1.00729	13313.1	0.025668	0.891918	908.779	1.4055	0.441942
Cal607240W	orf19.5612	0.989485	1.00657	13427.5	0.027619	0.887361	948.775	1.4055	0.277893
Cal403680W	orf19.4625	0.966043	1.0085	12555.3	0.05453	0.968309	1425.35	1.4045	0.465983
Cal105240W	orf19.3694	0.975729	1.00786	12859.7	0.0544638	0.968319	1424.34	1.402	0.227688
Cal509470W	orf19.3906	0.980551	1.00782	13034.9	0.0529296	0.955106	1399.7	1.4015	0.0176777
Cal218010W	orf19.2178.1	0.977605	1.00801	12927.1	0.060784	0.991847	1522.76	1.401	0.451134
Cal108510W	orf19.1031	0.775589	1.00011	9277.65	0.137882	1.01314	2541.9	1.4005	1.99192
Cal607080W	orf19.5604	0.959983	1.00762	12386.9	0.0558081	0.97078	1446	1.4	0.548715
CalR09300W	orf19.494	0.804208	1.00077	9654.26	0.0660587	1.00124	1601.09	1.399	1.93464
Cal508800W	orf19.3214	0.989024	1.00674	13404.6	0.028577	0.894341	967.708	1.3975	0.280721
Cal708540W	orf19.7193,orf19.7190	0.970301	1.00873	12682.8	0.0551615	0.970012	1435.5	1.397	0.366281
Cal100520W	orf19.6080	0.933551	1.00791	11759	0.09151	1.01375	1959.97	1.3965	1.19713
Cal132610W	orf19.7231	0.981906	1.00778	13088.2	0.0529358	0.95403	1399.89	1.3965	0.150614
Cal216570W	orf19.1893	0.972231	1.00806	12743.8	0.0558199	0.968659	1446.17	1.394	0.30547
Cal205020W	orf19.1545:orf19.1546	0.977984	1.00797	12941	0.0607191	0.991905	1521.82	1.393	0.363453
CalR12770W	orf19.6642	0.990166	1.00649	13463.4	0.0297571	0.896424	989.883	1.392	0.128693
CalR18260C	orf19.6369	0.900981	1.00556	11129.3	0.107242	1.01234	2164.79	1.392	1.43684
CalR04290C	orf19.2594	0.90796	1.00584	11255.2	0.0521891	0.95967	1387.74	1.3905	1.01894
CalR12580W	tC(GCA)1	0.986893	1.00747	13301.8	0.0310952	0.899341	1015.54	1.39	0.316784
Cal216980C	orf19.1868	0.98015	1.0079	13019.9	0.0548026	0.966046	1429.86	1.388	0.0169705
Cal223300C	orf19.1746	0.94938	1.0081	12115.5	0.0552547	0.970473	1436.92	1.388	0.668923
Cal304200C	orf19.1665	0.970748	1.00869	12696.5	0.0567453	0.973065	1460.98	1.3875	0.328805
Cal114220W	snR44a	0.988422	1.00726	13374	0.0364196	0.920977	1116.99	1.387	NaN
Cal222580W	orf19.1779	0.876055	1.00443	10705.8	0.0510752	0.957413	1369.07	1.387	1.1837
Cal404670C	orf19.4579	0.952914	1.0086	12201	0.0120718	0.770573	587.535	1.3855	1.14481
Cal222890C	orf19.1765	0.958367	1.00818	12344.2	0.0770987	0.989513	1762.84	1.3845	0.898733
Cal200270W	orf19.1907	0.978152	1.00792	12947	0.0559055	0.967826	1447.44	1.384	0.0820244
Cal413380W	tT(UGU)2:orf19.4406	0.393918	0.995269	5211.87	0.3494	1.01337	4772.09	1.384	NaN
CalR07910C	orf19.4398	0.950638	1.0084	12146.4	0.0557798	0.972623	1445.65	1.3835	0.649831
CalR01280W	orf19.7483,orf19.7482	0.981558	1.00778	13074.4	0.0202788	0.864235	791.5	1.3835	0.651245
Cal503800C	orf19.3203	0.991919	1.0058	13561.5	0.0255217	0.895424	905.525	1.383	NaN
Cal607680W	orf19.5704	0.679505	0.999901	8139.45	0.00398827	0.550381	314.897	1.3825	2.31012
Cal405490W	orf19.2756	0.9804	1.0078	13029.1	0.0556398	0.973696	1443.18	1.3825	0.0770747
Cal702420C	orf19.6897	0.987641	1.00739	13336.8	0.0274293	0.88915	944.894	1.3825	0.311834
CalR20550C	orf19.7314	0.963886	1.00828	12493.2	0.0582105	0.97964	1483.43	1.3825	0.457498
Cal313900W	orf19.7380	0.955897	1.00793	12278.7	0.0582885	0.978679	1484.8	1.381	0.575585
Cal602400W	orf19.118	0.771767	1.00044	9229.45	0.0451187	0.950247	1270.08	1.3795	1.60443
Cal113210W	orf19.2459	0.914374	1.00663	11374.1	0.0546591	0.967045	1427.57	1.379	0.954594
CalR05260W	orf19.3733	0.951355	1.00857	12163.7	0.0573278	0.974977	1469.89	1.3775	0.628618
Cal105750C	orf19.2947	0.954689	1.00819	12247	0.0779952	0.989623	1775.63	1.377	0.950352
Cal212080C	orf19.3568	0.864306	1.00343	10518.5	0.0512636	0.957229	1372.63	1.377	1.23037
Cal406510C	orf19.2701	0.984407	1.00778	13192.4	0.0280173	0.888337	956.943	1.3765	0.505581
Cal403100C	orf19.4649	0.953937	1.00865	12227.1	0.0125921	0.773136	601.472	1.3765	1.12076
Cal601640W	orf19.3643	0.991696	1.00593	13549	0.0261705	0.894363	918.661	1.375	NaN
Cal510090W	orf19.3936	0.980077	1.00804	13017	0.0566239	0.972133	1459.06	1.3745	0.092631
Cal508540C	orf19.1106	0.958237	1.00827	12341	0.0591822	0.981178	1498.67	1.374	0.527502
Cal220080W	orf19.216	0.97909	1.0081	12981.1	0.0571318	0.975077	1466.95	1.374	0.0141421
Cal702940W	orf19.6920	0.896732	1.00609	11054.1	0.0536563	0.958668	1411.04	1.374	1.055
Cal201850C	orf19.2036	0.968681	1.00885	12632.8	0.0703044	0.998735	1663.46	1.372	0.675994
CalR02100C	orf19.3264	0.979164	1.00803	12983.9	0.0578061	0.976235	1477.13	1.371	0.0438406
Cal706290C	orf19.5169	0.933626	1.00792	11760.7	0.0565811	0.97255	1458.43	1.3705	0.794081
Cal411990W	orf19.1789	0.966191	1.00844	12559.7	0.0597502	0.983841	1507.49	1.369	0.388909
Cal709330W	orf19.7139,orf19.7136	0.942354	1.00847	11951.4	0.0294596	0.894906	984.256	1.368	1.19642
Cal206320C	orf19.5817	0.971244	1.00855	12712.7	0.0698668	1.00235	1657.37	1.3675	0.58902
Cal400530W	orf19.5651	0.956687	1.00803	12298.9	0.0382816	0.932269	1150.85	1.367	1.02672
Cal119610C	orf19.409	0.974912	1.00781	12831.7	0.0590262	0.979714	1496.07	1.3655	0.161927
Cal222500C	orf19.1782.1	0.973885	1.00797	12797.7	0.0673727	1.00642	1621	1.3645	0.499924
CalR07380C	orf19.2395	0.844095	1.00303	10215.1	0.0518392	0.959323	1382.17	1.3645	1.74585
Cal311190C	orf19.5960	0.94678	1.00903	12054.6	0.0286542	0.892903	969.319	1.3625	1.14622
Cal121090W	orf19.4784	0.969102	1.00886	12645.8	0.0704569	0.996992	1665.93	1.3615	0.649831
Cal124610W	orf19.1836	0.964522	1.00829	12512.4	0.0741435	1.00032	1719.29	1.361	0.745291
Cal601490C	orf19.3651	0.983281	1.00798	13145.2	0.0292402	0.893861	980.515	1.361	0.516188
Cal411480W	orf19.738	0.980216	1.00783	13022.5	0.0151663	0.816952	669.216	1.3605	0.675287
Cal605330W	LSU-C2809	0.936643	1.00899	11825.2	0.0125183	0.778498	599.437	1.3595	1.25511
Cal113290W	orf19.2457	0.854202	1.0036	10364	0.0532947	0.953383	1405.36	1.359	1.24875
Cal125100W	orf19.2328	0.979062	1.00814	12980.3	0.0595466	0.983843	1504.13	1.358	0.125865
Cal509210W	orf19.3895	0.866295	1.0026	10549.4	0.0541498	0.966293	1419.17	1.356	1.18935
Cal602430C	orf19.119	0.979126	1.00807	12982.3	0.0597164	0.984403	1506.85	1.356	0.159806
Cal509000W	orf19.1285	0.980653	1.00763	13038.1	0.0156239	0.820254	680.335	1.3555	0.655488
Cal708670W	orf19.7185	0.950146	1.00832	12134.8	0.0293775	0.894286	982.877	1.3555	1.10379
Cal414120C	orf19.2901	0.795163	0.999212	9532.89	0.00571912	0.623083	384.468	1.354	1.92616
Cal307110W	orf19.305	0.914948	1.00665	11385.2	0.0585638	0.981029	1489.02	1.354	0.910754
Cal318320C	orf19.6188:orf19.6189	0.983932	1.00786	13171.9	0.0290311	0.900771	976.498	1.354	0.483661
CalR02310W	orf19.3256	0.968539	1.00885	12628.9	0.0620462	1.00117	1541.82	1.353	0.304056
CalR14790W	orf19.697	0.675316	1.00095	8093.16	0.0412795	0.934594	1203.76	1.349	1.85969
Cal608410W	orf19.5750	0.974706	1.00781	12824.9	0.0615183	0.999327	1533.72	1.3485	0.122329
Cal506520W	orf19.4324	0.973974	1.00792	12800.7	0.0618958	1.00209	1539.35	1.3475	0.140714
CalR05800C	orf19.2818	0.675317	1.00085	8093.2	0.0419593	0.935369	1216.01	1.3475	1.85757
CalR01250C	orf19.7484	0.942605	1.00829	11957.3	0.0297488	0.898042	989.741	1.347	1.1639
Cal701390W	orf19.7050	0.974335	1.00793	12812.1	0.0619752	1.00114	1540.61	1.3465	0.126572
Cal212380C	orf19.3581	0.726693	1.00274	8681.22	0.157136	1.02656	2765.35	1.346	2.0591
Cal105150C	orf19.3690.2	0.978023	1.00793	12942.5	0.061862	1.00266	1538.84	1.3455	0.113844
Cal408430C	orf19.1303,orf19.1302	0.655235	1.00067	7872.14	0.0397136	0.940278	1176.29	1.3445	1.9099
CalR09170W	orf19.488	0.968879	1.00899	12638.5	0.0638399	1.0033	1568.6	1.343	0.268701
Cal312410W	orf19.6979	0.976262	1.00777	12878.6	0.06255	1.0026	1549.18	1.3425	0.0190918
Cal401170W	orf19.4189	0.970656	1.00874	12693.3	0.0634762	1.00302	1563.1	1.3425	0.222739
Cal602140W	orf19.100:orf19.101	0.958866	1.00812	12357.5	0.0639634	1.00415	1570.42	1.3425	0.457498
Cal507850C	orf19.6668	0.976495	1.00779	12886.9	0.0627653	1.00162	1552.55	1.3415	0.00070714
Cal706370W	orf19.5166	0.982494	1.00795	13111.6	0.0351035	0.908304	1092.9	1.3415	0.470226
Cal606390W	orf19.5564	0.972862	1.00792	12764.8	0.0630331	1.00368	1556.42	1.3405	0.160513
Cal106370C	orf19.2972	0.966977	1.00853	12583.7	0.0646839	1.00458	1580.95	1.34	0.302642
Cal312630W	tV(AAC)6:SNRNAU6	0.613726	0.998192	7424.77	0.0371843	0.922603	1130.75	1.338	2.01667
Cal214720C	orf19.34	0.975879	1.00766	12865.5	0.0633851	1.00377	1561.57	1.3375	0.0176777
Cal317200C	orf19.6756	0.953117	1.00859	12205.9	0.0654962	1.00321	1592.96	1.3365	0.528209
Cal103620C	orf19.3357	0.873281	1.00443	10661.2	0.118928	1.01787	2311.22	1.3365	1.51109
Cal126560W	orf19.1167	0.966785	1.00855	12577.5	0.0653485	1.00414	1590.81	1.336	0.298399
Cal406390C	orf19.2708	0.965237	1.00853	12532.5	0.0154955	0.825478	677.196	1.3355	0.919946
Cal503490W	orf19.4152	0.97123	1.00868	12712.2	0.0644403	1.00402	1577.37	1.3355	0.187383
CalR06470W	orf19.2846	0.977718	1.00791	12931.5	0.0632229	1.0045	1559.12	1.3355	0.181726
Cal215020W	orf19.3152	0.977876	1.00793	12937.3	0.0627295	1.00326	1551.94	1.335	0.239002
Cal114290W	orf19.6277	0.160763	0.999339	2806.68	0.0171222	0.843878	718.333	1.3345	3.56453
Cal102730W	orf19.3314:orf19.3315	0.969066	1.00889	12644.8	0.0737481	0.997768	1714.07	1.334	0.575585
Cal118240C	orf19.5076	0.943767	1.00864	11984.7	0.0660732	1.00042	1601.35	1.334	0.626497
Cal107510W	orf19.3035	0.971412	1.00865	12718	0.0648026	1.00319	1582.72	1.333	0.178191
Cal205130C	orf19.1553	0.954919	1.00814	12253	0.082274	1.00265	1835.78	1.333	0.859842
Cal105660W	orf19.2942	0.961126	1.00758	12417.3	0.0779213	0.992162	1774.58	1.3325	0.762968
Cal402180W	orf19.4691	0.956919	1.00812	12305.1	0.0657495	1.00285	1596.56	1.3315	0.465983
Cal212050C	orf19.3567	0.974525	1.00784	12818.3	0.0677888	1.00641	1627.17	1.331	0.408708
Cal506550W	orf19.4326	0.96465	1.00828	12515.9	0.0661001	0.999781	1601.69	1.331	0.333754
Cal606920C	orf19.5595	0.878835	1.00452	10751.1	0.0603023	0.988439	1515.41	1.331	1.0847
Cal510710W	orf19.3966	0.977272	1.00788	12914.5	0.0643872	1.00427	1576.5	1.3295	0.197283
Cal104810W	orf19.3675	0.954467	1.00848	12241.1	0.0665383	1.00015	1608.39	1.329	0.494975
Cal413760C	orf19.2922	0.974068	1.00794	12803.1	0.0647716	1.00379	1582.14	1.329	0.0806102
Cal707690C	orf19.6707	0.975003	1.00776	12834.7	0.065352	1.00313	1590.86	1.3285	0.0190918
Cal301960W	orf19.6165	0.976718	1.00774	12894.6	0.0651629	1.00341	1588.2	1.328	0.123037
Cal501800W	orf19.581	0.995548	1.004	13806.8	0.0050766	0.583809	359.255	1.328	NaN
Cal201610C	orf19.2048:orf19.2047	0.911826	1.00604	11325.7	0.103912	1.00985	2122.12	1.327	1.26855
Cal601050W	orf19.4208:orf19.4207	0.350784	1.00631	4785.78	0.0270131	0.885566	936.698	1.327	2.73792
Cal129710C	orf19.4928	0.952093	1.00876	12181.3	0.0843644	1.01195	1863.74	1.3265	0.897319
Cal205090W	orf19.1551	0.913454	1.00661	11356.5	0.0620545	1.00019	1541.93	1.3265	0.878934
Cal217600C	tM(CAU)2,tM(CAU)1	0.942506	1.00834	11954.8	0.0893313	1.01443	1931.38	1.3245	1.00338
Cal201370C	orf19.2060	0.975757	1.00775	12860.6	0.0662871	0.99948	1604.69	1.324	0.0650538
Cal222200W	orf19.1363	0.972169	1.00814	12741.7	0.0656239	1.00305	1594.72	1.324	0.135764
Cal409490W	orf19.1430	0.897216	1.00601	11062.9	0.0619462	1.00179	1540.19	1.3225	0.973686
Cal120390W	orf19.4755,orf19.4756	0.988689	1.0069	13388.2	0.0350483	0.910125	1091.88	1.322	NaN
Cal500980W	orf19.943	0.901086	1.00545	11131.1	0.012715	0.770879	605.019	1.322	1.43967
Cal203460W	orf19.1471	0.687858	0.999505	8233.81	0.0461725	0.951693	1287.9	1.3215	1.78262
Cal220180W	orf19.210	0.965373	1.00853	12536.5	0.0677474	1.00683	1626.44	1.3215	0.294864
Cal501760C	orf19.580	0.925123	1.00691	11584.4	0.0644872	1.00367	1578.14	1.3205	0.782767
Cal119550C	orf19.406	0.956853	1.00813	12303.5	0.0818916	1.00136	1830.31	1.32	0.811759
Cal502940C	orf19.1936	0.983377	1.00793	13148.9	0.0307115	0.89901	1008.41	1.32	0.442649
Cal216690W	orf19.1888	0.951775	1.00879	12173.6	0.0849572	1.01319	1871.76	1.319	0.888126
Cal317840W	orf19.6722	0.980198	1.00788	13021.6	0.0322167	0.90294	1037.52	1.319	0.535987
Cal406170C	orf19.2723	0.978969	1.00819	12977.3	0.0179896	0.857467	739.196	1.318	0.633568
Cal212180W	orf19.3572.3	0.966943	1.00857	12582.6	0.0751318	1.00061	1733.81	1.317	0.606698
Cal409230W	orf19.5299,orf19.5299.1	0.895132	1.00624	11026.1	0.0631919	1.0051	1558.66	1.317	0.974393
Cal130910W	orf19.4980	0.959204	1.00811	12366	0.068383	1.00494	1635.85	1.3145	0.398101
Cal219520C	orf19.3607	0.926476	1.00725	11611.7	0.0659282	1.00031	1599.12	1.314	0.759433
Cal412880W	orf19.1259	0.931197	1.00762	11709.7	0.0670366	1.00244	1616.05	1.3135	0.716299
CalR21620W	orf19.6595	0.970478	1.00884	12687.4	0.0733402	0.998778	1708.07	1.3135	0.501339
Cal125710W	orf19.2298	0.974782	1.00775	12827.5	0.0696701	1.0045	1654.64	1.313	0.250316
Cal601830W	orf19.88,orf19.89	0.9473	1.009	12066	0.0159972	0.833813	690.009	1.3125	1.08965
Cal131580W	orf19.5015	0.975142	1.00783	12839.6	0.0682733	1.00537	1634.42	1.312	0.0890955
CalR22900C	orf19.7604	0.970273	1.00877	12682.1	0.0735287	0.997594	1710.76	1.312	0.50346
Cal111240C	orf19.52	0.95243	1.0089	12189.6	0.0852181	1.01214	1875.36	1.31	0.86267
Cal300720W	orf19.5432	0.96621	1.00838	12560.2	0.0689862	1.00564	1644.57	1.3095	0.253851
CalR10580W	orf19.1734,orf19.6318	0.973848	1.008	12796.7	0.0722077	0.997417	1691.71	1.309	0.21496
Cal122970W	orf19.4871	0.959402	1.00788	12371.2	0.0811311	0.997954	1819.95	1.3085	0.744583
Cal407400C	orf19.1439	0.970577	1.00873	12690.7	0.0688192	1.00422	1642.24	1.3085	0.133643
Cal202350W	orf19.2012	0.938224	1.00875	11858.4	0.0694106	1.00576	1651.12	1.308	0.639224
Cal307050C	orf19.302	0.957711	1.00808	12327.1	0.0697985	1.00435	1656.39	1.3065	0.402344
Cal215130C	orf19.3149	0.956253	1.00801	12287.7	0.0834051	1.00628	1850.76	1.306	0.796202
Cal219260W	orf19.3618	0.607337	0.99822	7357.54	0.0404762	0.936901	1189.61	1.306	1.98697
Cal309330C	orf19.5854	0.90695	1.00595	11236.7	0.0649213	1.00289	1584.54	1.3055	0.890247
Cal703620W	orf19.6556	0.972156	1.00827	12741.2	0.0692726	1.00577	1649.01	1.3045	0.0671752
Cal109890C	orf19.5198	0.942386	1.00843	11952	0.0708468	0.998609	1671.82	1.304	0.591141
Cal510060W	orf19.3934	0.977357	1.00789	12918	0.0341408	0.907706	1074.68	1.3025	0.580535
Cal105850C	orf19.2952	0.950885	1.00837	12152.8	0.0867005	1.01642	1895.39	1.302	0.868327
Cal314080C	orf19.7388	0.913221	1.00666	11352.5	0.0505576	0.956371	1360.54	1.302	1.30532
Cal602050C	orf19.96	0.973751	1.00798	12793.2	0.0703879	0.998942	1664.83	1.3015	0.0487904
CalR12610W	orf19.5843	0.970478	1.00884	12687.4	0.0700856	1.00053	1660.31	1.3015	0.116673
Cal304850W	orf19.1637,orf19.1636	0.932576	1.00753	11738.9	0.0710235	0.996254	1674.63	1.301	0.680237
Cal709180C	orf19.7150	0.976442	1.00788	12885.1	0.0402602	0.937894	1186.31	1.301	0.569928
CalR21130W	orf19.7341.1	0.97648	1.00785	12886.3	0.0658599	1.00348	1598.22	1.301	0.295571
Cal208880W	orf19.829	0.968663	1.00891	12632.2	0.076089	0.995962	1748.12	1.3005	0.514067
Cal125370W	orf19.2312	0.86524	1.00323	10533.2	0.122542	1.01698	2357.03	1.3	1.49624
Cal702680C	orf19.6907	0.973723	1.00802	12792.4	0.0705431	0.996267	1667.33	1.3	0.0523259
Cal128040W	orf19.5242	0.963148	1.00809	12472.8	0.0710752	0.996016	1675.61	1.2995	0.294864
Cal316270W	orf19.6805	0.806734	1.00082	9689.01	0.0580366	0.977849	1480.64	1.299	1.35482
Cal107670W	tN(GUU)3	0.970502	1.00872	12688.2	0.0743451	1.00024	1722.16	1.298	0.465276
CalR09330C	orf19.497	0.900316	1.00575	11117.7	0.0527612	0.959235	1397.01	1.298	1.37603
Cal111450W	orf19.4064	0.973613	1.00798	12789.1	0.0723975	0.996239	1694.2	1.2975	0.25668
Cal311750C	orf19.5991	0.975402	1.00781	12848.6	0.0406694	0.933914	1193.39	1.2975	0.590434
Cal402150W	orf19.4697	0.50746	0.996085	6337.39	0.0347888	0.906637	1087.06	1.2965	2.24789
Cal111600W	orf19.4056	0.824961	1.00266	9941.02	0.126369	1.01501	2403.57	1.2955	1.66948
Cal212960W	orf19.6888	0.939654	1.00849	11890.7	0.0936536	1.01196	1988.87	1.2955	0.986414
Cal127080C	orf19.1140	0.956497	1.00805	12294	0.0720697	0.998365	1689.86	1.294	0.39598
Cal302370C	orf19.2510	0.948616	1.00817	12097.2	0.0723347	0.996321	1693.41	1.294	0.502046
Cal120680C	orf19.4767	0.969618	1.00889	12660.9	0.0717371	0.99949	1685.11	1.293	0.114551
Cal131850C	orf19.5026	0.972623	1.00789	12757	0.0724941	0.996622	1695.65	1.293	0.36911
CalR13020W	tP(UGG)4	0.724699	1.00228	8658	0.0525293	0.962263	1393.13	1.2925	1.62988
Cal120330W	snR128	0.971905	1.00852	12733.7	0.0716246	1.00081	1683.45	1.291	0.0240416
Cal703970C	orf19.6536	0.992756	1.00489	13614.9	0.0183954	0.862621	748.786	1.291	NaN
CalR20400W	orf19.7307	0.975525	1.00787	12853.4	0.068432	1.00464	1636.63	1.291	0.248902
Cal201170C	orf19.2069	0.972166	1.00821	12741.4	0.0761415	0.993955	1748.91	1.29	0.195161
Cal121760C	orf19.4818	0.688829	0.999913	8244.55	0.0498558	0.954306	1349.52	1.289	1.73383
Cal602180W	orf19.102:orf19.103	0.958925	1.00804	12359.2	0.0735307	0.996688	1710.79	1.289	0.343654
Cal200420W	orf19.2112	0.971964	1.00843	12735.5	0.0722788	0.996499	1692.75	1.2885	0.00353553
Cal603020W	orf19.3444	0.972975	1.00782	12767.7	0.0727605	0.994623	1699.42	1.2885	0.0714178
Cal220690C	orf19.4079	0.967789	1.00865	12606.1	0.0776756	0.992522	1770.81	1.2885	0.511238
Cal506150W	orf19.4304	0.973961	1.00798	12800.3	0.0720304	0.999732	1689.27	1.288	0.175362
Cal609040C	orf19.1215	0.601936	0.998404	7300.66	0.0426529	0.933595	1228.32	1.288	1.97424
Cal307890C	orf19.340	0.941522	1.00818	11932.4	0.0362181	0.92232	1113.24	1.2875	1.07975
Cal122770W	orf19.4863	0.950673	1.00836	12147.4	0.0734686	0.999587	1710.01	1.2865	0.467398
Cal117560W	orf19.1232	0.63903	1.00146	7694.52	0.16258	1.02873	2827.44	1.2855	2.23375
CalR21070W	orf19.7341	0.969712	1.00891	12664	0.0759303	0.994783	1745.99	1.2855	0.456084
CalR17860W	tG(GCC)1	0.92309	1.00682	11543.9	0.100266	1.00543	2075.03	1.2855	1.12359
Cal610080W	orf19.2132	0.97213	1.00832	12740.2	0.0761028	0.995244	1748.31	1.285	0.222032
Cal706140W	orf19.5175	0.592168	0.999362	7199.61	0.0835707	1.00576	1853.21	1.285	2.37164
Cal219780C	orf19.3590	0.972966	1.00788	12767.4	0.0737792	0.997258	1714.43	1.2845	0.123744
Cal115050W	orf19.6244	0.987724	1.00733	13340.7	0.0373575	0.925316	1134.01	1.284	NaN
Cal609470W	orf19.1078	0.980531	1.00787	13034.3	0.0345935	0.906438	1083.51	1.284	0.465276
Cal312970W	orf19.6998	0.930991	1.00762	11705.2	0.0735321	0.995776	1710.81	1.283	0.66468
Cal511850W	orf19.4031	0.959215	1.00798	12366.4	0.0178309	0.864114	735.251	1.283	0.91641
Cal224090C	orf19.5358	0.874545	1.00477	10682.7	0.119593	1.02055	2319.35	1.2825	1.42765
Cal507710W	orf19.6660	0.973427	1.00793	12782.7	0.0197012	0.857267	778.256	1.282	0.698622
Cal118660C	orf19.5101	0.886801	1.00554	10882.8	0.0681829	1.00506	1633.18	1.2805	0.963787
Cal300590W	orf19.5440	0.962715	1.00793	12460.9	0.0812912	0.998229	1822.16	1.28	0.619426
Cal302540C	orf19.158	0.941553	1.00814	11933.1	0.0746335	1.00041	1726.6	1.28	0.555786
Cal708050C	orf19.6701	0.96605	1.00843	12555.7	0.0263858	0.897488	923.081	1.2795	0.806809
CalR03540W	orf19.2542	0.965329	1.00855	12535.3	0.0746018	1.00276	1726.13	1.2795	0.190212
Cal108370W	orf19.1036	0.946882	1.009	12056.8	0.0907391	1.01373	1950.07	1.279	0.875398
Cal124910W	orf19.2337,orf19.2336	0.964334	1.00831	12506.8	0.0802133	0.996818	1806.9	1.279	0.58407
Cal500910W	orf19.946	0.927222	1.00738	11626.4	0.0165169	0.836818	703.349	1.279	1.21057
Cal306820W	orf19.287	0.971934	1.00847	12734.7	0.0747585	1.00023	1728.51	1.278	0.0664681
Cal510630W	orf19.3962:tA(AGC)5	0.957686	1.0082	12326.4	0.0753264	1.00136	1736.72	1.278	0.34224
Cal108470C	orf19.1032	0.913258	1.00663	11353.3	0.0708779	0.998076	1672.34	1.2775	0.799738
Cal402460W	orf19.4679	0.972521	1.008	12753.7	0.0746301	1.00129	1726.54	1.2775	0.282136
CalR07120W	orf19.2407	0.978718	1.00815	12968.1	0.0403326	0.93657	1187.46	1.277	0.468105
Cal406370C	orf19.2709	0.959032	1.00801	12361.8	0.0754224	1.0008	1738.15	1.2765	0.316077
Cal307740W	orf19.334	0.815979	1.00242	9815.27	0.0627357	1.00225	1552.05	1.276	1.28128
Cal129280W	orf19.6343,orf19.6342	0.972117	1.00837	12739.6	0.0752533	1.0013	1735.68	1.275	0.0989949
CalR10480W	orf19.1736	0.905184	1.00561	11203.9	0.0704507	0.997879	1665.85	1.275	0.852771
Cal130950W	snR3a	0.953631	1.00862	12220	0.0872878	1.01346	1903.21	1.2745	0.77711
Cal316290W	tY(GUA)3:orf19.6804	0.954724	1.00816	12247.9	0.0766908	0.997531	1756.79	1.2745	0.376888
Cal105110W	orf19.3688	0.786831	1.00186	9423.19	0.0603768	0.988542	1516.51	1.2735	1.39088
Cal314700W	orf19.7401	0.992691	1.00532	13609.5	0.0171146	0.846382	718.148	1.273	NaN
Cal112910W	orf19.2476	0.944275	1.00874	11996.3	0.0761325	0.994734	1748.74	1.2725	0.511238
Cal218450W	orf19.2219,orf19.2127	0.91316	1.00682	11351.3	0.0726384	0.99483	1697.56	1.2715	0.788424
Cal309790W	orf19.5871	0.729077	1.00278	8709.02	0.0554403	0.972554	1439.9	1.2715	1.58604
Cal117510W	orf19.1228	0.988922	1.00685	13399.9	0.0328406	0.90813	1049.74	1.27	NaN
Cal219110W	orf19.3626.1	0.958371	1.00812	12344.4	0.0877771	1.01185	1910.17	1.2695	0.671044
Cal404440W	orf19.4591	0.940935	1.00844	11919.2	0.018038	0.85415	740.347	1.2695	1.08682
Cal212760W	orf19.6880	0.971149	1.00867	12709.7	0.0770683	0.99	1762.33	1.269	0.318198
CalR01760W	orf19.3282	0.975152	1.00777	12840	0.0423354	0.937982	1222.38	1.269	0.547301
Cal403710W	orf19.4624	0.95057	1.0084	12144.7	0.0767591	0.996631	1757.99	1.269	0.429921
Cal403480W	orf19.4629	0.901199	1.00542	11133.1	0.0712478	0.997469	1678.09	1.268	0.865499
Cal410580W	tQ(UUG)4:orf19.3812	0.965212	1.00858	12532	0.0768827	0.992012	1760.01	1.268	0.16122
Cal701460W	orf19.7047	0.969933	1.00893	12671.1	0.0768606	0.994384	1759.65	1.268	0.00141428
Cal215220W	orf19.2228	0.706126	1.00037	8441.36	0.0545556	0.967576	1425.83	1.2675	1.64968
Cal214500C	orf19.26	0.97066	1.00867	12693.4	0.0769193	0.99072	1760.47	1.2675	0.0431335
Cal311150W	orf19.5958	0.932752	1.00765	11742.5	0.0773533	0.991026	1766.61	1.2675	0.617304
Cal121250W	orf19.4792	0.853268	1.00389	10350	0.0673927	1.00568	1621.27	1.267	1.11299
Cal402530W	orf19.4677	0.929297	1.00775	11670.1	0.0767522	0.997435	1757.91	1.267	0.649124
CalR13340W	orf19.454	0.971559	1.00873	12722.4	0.0768668	0.993577	1759.73	1.267	0.275772
Cal110260C	orf19.6850	0.969292	1.00884	12651.4	0.0767992	0.994477	1758.56	1.2665	0.0275772
Cal301170W	orf19.5408	0.928286	1.00748	11648.6	0.100983	1.00498	2084.27	1.2665	1.04581
Cal205290C	orf19.1564	0.875086	1.00467	10691	0.0701573	0.998605	1661.4	1.2655	1.00056
Cal207430W	orf19.899	0.972311	1.00807	12746.7	0.0756494	1.00106	1741.57	1.265	0.172534
Cal217830W	orf19.2184	0.969954	1.0088	12671.7	0.0777667	0.991064	1772.49	1.265	0.0240416
Cal507960W	orf19.6674	0.92613	1.00718	11604.1	0.0767757	0.995953	1758.18	1.2635	0.675287
Cal412760C	orf19.1253	0.382415	0.997334	5098.12	0.401398	1.00872	5286.51	1.263	NaN
Cal507230W	orf19.2650	0.989217	1.0068	13414.3	0.0315997	0.901339	1025.72	1.263	NaN
CalR02330W	orf19.3255	0.918922	1.00613	11460.6	0.0769324	0.990009	1760.63	1.263	0.732563
Cal402450W	orf19.4679	0.864231	1.0035	10517.2	0.0694258	1.00397	1651.36	1.2625	1.05571
Cal104780C	orf19.3674	0.971069	1.00873	12706.9	0.0779834	0.990342	1775.44	1.262	0.274357
Cal122780W	orf19.4863	0.953522	1.00858	12217.1	0.0895162	1.01256	1933.78	1.2615	0.751654
Cal210550W	orf19.150	0.958544	1.00808	12349	0.0780207	0.988217	1776.01	1.261	0.291328
Cal220060C	orf19.216	0.963487	1.00808	12482	0.0782878	0.989006	1779.46	1.2605	0.185969
Cal101470W	orf19.6036	0.85759	1.00335	10414.6	0.0693637	1.00609	1650.45	1.26	1.08187
Cal202540W	orf19.2003	0.768988	1.00114	9194.56	0.286978	1.0212	4150.82	1.26	NaN
Cal600990W	orf19.4210	0.968973	1.00901	12641.9	0.0832429	1.00684	1848.43	1.26	0.156978
CalR10050W	orf19.540	0.767351	1.00225	9174.32	0.0608696	0.992126	1524.14	1.259	1.44108
Cal216990W	orf19.1868	0.96128	1.00766	12421.7	0.0855563	1.01283	1879.76	1.2585	0.594677
Cal406860W	orf19.2684	0.977674	1.008	12929.6	0.0434451	0.940987	1241.89	1.258	0.451134
Cal502960W	orf19.1934	0.95485	1.00814	12251	0.0790387	0.989862	1790.29	1.258	0.343654
Cal132600W	orf19.7231	0.939641	1.00855	11890.5	0.0960821	1.0074	2020.36	1.257	0.924896
CalR19200W	orf19.6422:orf19.6423	0.971073	1.00866	12707.2	0.0781242	0.988664	1777.18	1.257	0.14425
Cal101900W	orf19.6018	0.853509	1.00368	10353.7	0.0695756	1.00413	1653.28	1.2565	1.09389
Cal709170W	orf19.7150	0.918207	1.00649	11446.9	0.0361159	0.921338	1111.37	1.256	1.22329
Cal103840W	orf19.4549	0.896598	1.00625	11051.4	0.112153	1.01568	2226.9	1.255	1.26431
Cal317530W	snR52:tR(UCU)5	0.960987	1.00758	12413.1	0.0790531	0.989188	1790.53	1.255	0.230517
Cal404800W	orf19.4574	0.950295	1.00833	12138.3	0.0191705	0.854708	766.339	1.255	0.975807
CalR13730C	orf19.3869	0.856865	1.00339	10403.7	0.070087	0.999567	1660.37	1.255	1.07763
Cal109270W	orf19.1045:orf19.1047	0.984748	1.00777	13207.9	0.04547	0.95211	1276.15	1.254	NaN
Cal408540C	orf19.1297	0.963681	1.00814	12487.3	0.0797329	0.99426	1800.29	1.2535	0.161927
CalR00760W	orf19.7506	0.967586	1.00858	12600.8	0.0801822	0.998144	1806.57	1.2525	0.0332341
Cal500730W	tS(CAG)1,orf19.953.1	0.977211	1.00796	12912.2	0.0441373	0.947481	1253.22	1.2515	0.453255
CalR00940W	orf19.7499	0.978423	1.00799	12956.6	0.0442305	0.946677	1254.79	1.2515	0.416486
CalR22160W	orf19.7566	0.932849	1.0076	11744.7	0.0996832	1.00796	2067.25	1.2515	0.977929
Cal504000W	orf19.3192	0.876031	1.00449	10705.3	0.0725542	0.995559	1696.56	1.251	0.972979
CalR05450W	orf19.3722:orf19.3721	0.97171	1.0086	12727.3	0.0770311	0.990399	1761.84	1.251	0.190919
Cal509350W	orf19.3902	0.980355	1.00783	13027.4	0.0442464	0.945619	1255.13	1.2505	0.342947
Cal404330C	orf19.4596:orf19.4595	0.971016	1.00875	12704.9	0.0783934	0.987757	1781.22	1.25	0.164049
Cal409060C	orf19.5307	0.994653	1.00415	13740.6	0.00246239	0.440494	241.713	1.25	NaN
Cal108240W	orf19.71	0.90894	1.00538	11272.7	0.0781953	0.9887	1777.99	1.249	0.776403
Cal208510W	orf19.846	0.89224	1.00572	10975.5	0.107631	1.0114	2169.93	1.2485	1.28764
Cal205320W	orf19.1565:orf19.1566	0.980869	1.00764	13046.5	0.0557164	0.97386	1444.44	1.248	NaN
Cal300370W	orf19.5451	0.968536	1.00892	12628.8	0.0812526	0.998601	1821.57	1.248	0.039598
Cal213980W	orf19.5487:orf19.5488	0.971655	1.00869	12725.4	0.0772098	0.990062	1764.46	1.248	0.200818
Cal503510W	orf19.4153	0.965461	1.00847	12539	0.0209572	0.865157	806.846	1.2475	0.785596
Cal205500C	orf19.1576	0.961007	1.00752	12413.7	0.0810048	0.998945	1818.23	1.247	0.206475
Cal504300W	orf19.3176	0.966238	1.00834	12560.9	0.0459634	0.952804	1284.15	1.247	0.697207
Cal302050W	orf19.6168	0.857388	1.00328	10411.6	0.126098	1.01678	2400.33	1.246	1.45947
Cal503500W	orf19.4152	0.967754	1.00869	12605.3	0.0463699	0.9517	1291.06	1.246	0.661852
Cal124400W	orf19.1005	0.847517	1.00339	10264.8	0.0709131	0.997602	1672.9	1.2455	1.10662
CalR05630W	orf19.172	0.96644	1.00833	12566.8	0.0821415	1.00357	1833.94	1.245	0.039598
Cal304310W	tV(AAC)2,orf19.1662	0.84439	1.00313	10219.2	0.0704941	0.996546	1666.41	1.244	1.11864
Cal103070W	orf19.3330	0.904641	1.00608	11193.7	0.077735	0.991532	1771.92	1.244	0.801859
Cal210150C	orf19.4502	0.870725	1.00412	10620.6	0.073254	0.998542	1706.49	1.244	0.991364
Cal500390C	orf19.979	0.969971	1.00868	12672.3	0.0803768	0.996287	1809.3	1.244	0.13435
Cal108600W	orf19.1027	0.916608	1.00657	11416.3	0.10613	1.01173	2150.05	1.2425	1.10521
Cal204010W	orf19.1496	0.860823	1.00332	10464.6	0.118208	1.01652	2302.67	1.2425	1.44462
Cal511910C	orf19.4035:orf19.4036	0.923747	1.00655	11556.3	0.0188875	0.866076	760.029	1.2425	1.18299
Cal306840W	orf19.288	0.966763	1.0086	12576.6	0.0830649	1.00636	1845.99	1.242	0.00848534
CalR00970W	orf19.7497	0.913345	1.00665	11354.8	0.0802036	0.997554	1806.8	1.2415	0.73327
Cal113870W	orf19.2661,orf19.33	0.952801	1.00877	12198.4	0.0907723	1.01332	1950.5	1.2405	0.727613
Cal405380W	orf19.2762	0.905498	1.00572	11209.7	0.0796487	0.994922	1799.08	1.24	0.787717
Cal114090W	orf19.1825	0.965856	1.00874	12549.6	0.0892988	1.01485	1930.87	1.2395	0.0883883
CalR00210C	orf19.7539	0.967171	1.00851	12588.9	0.0468378	0.954543	1299.29	1.2395	0.662559
Cal212650W	orf19.6874	0.968051	1.00878	12614.2	0.0831642	1.00673	1847.34	1.238	0.333754
Cal218550C	orf19.1354	0.955808	1.00798	12276.1	0.082931	1.00558	1844.36	1.238	0.282843
Cal309280W	orf19.918	0.96344	1.00818	12480.7	0.0833534	1.00649	1850.19	1.2375	0.111016
CalR15980W	orf19.9	0.88395	1.00498	10834.8	0.0758571	0.997432	1744.82	1.237	0.910754
Cal104240W	orf19.4530.1	0.901552	1.00566	11139	0.110266	1.0138	2204.27	1.2365	1.20986
Cal502030W	orf19.1978	0.86201	1.00374	10482.8	0.0742422	1.00072	1720.64	1.2345	1.02036
Cal411390C	orf19.3773	0.994497	1.00413	13730.9	0.00171567	0.469057	198.273	1.234	NaN
Cal604490C	orf19.3508	0.938259	1.00871	11859.3	0.0199772	0.858961	784.415	1.234	1.05642
Cal101860W	orf19.6021	0.944897	1.00888	12010.9	0.095412	1.00693	2011.73	1.2335	0.823779
Cal700080C	orf19.7121,orf19.7119	0.888545	1.0057	10912.5	0.0774631	0.991555	1767.95	1.2335	0.87752
Cal408640W	orf19.5040	0.994442	1.00414	13726.5	0.00209524	0.44	222.648	1.233	NaN
Cal213120W	orf19.5205	0.839914	1.00291	10153.1	0.124156	1.01697	2376.44	1.2315	1.52806
Cal115910W	orf19.6202	0.967137	1.00855	12588.1	0.0847502	1.01406	1868.98	1.231	0.343654
CalR15450W	orf19.1843	0.967892	1.00868	12609.3	0.0855783	1.01227	1880.1	1.2305	0.232638
CalR20410C	orf19.7308	0.946264	1.00908	12042.7	0.09804	1.00967	2046.33	1.23	0.784888
Cal214840C	orf19.36.1	0.969794	1.00885	12666.9	0.0810697	0.998046	1819.24	1.2295	0.171827
CalR11220C	orf19.634	0.929298	1.00767	11670.1	0.084227	1.01114	1862.01	1.2285	0.580535
CalR22610W	orf19.7589	0.965815	1.00877	12548.5	0.0845866	1.01294	1866.56	1.2285	0.412243
Cal103940C	orf19.4544	0.903704	1.00597	11177.2	0.110762	1.0145	2210.4	1.228	1.17945
Cal402510W	orf19.4678	0.544883	0.996133	6713.6	0.381233	1.00547	5086.44	1.228	NaN
Cal207280W	orf19.908	0.94098	1.00842	11920.3	0.0982436	1.00961	2048.94	1.228	0.855599
Cal100850C	orf19.6068	0.963308	1.00811	12477	0.0869758	1.01635	1899.08	1.2275	0.477297
Cal600440C	LSU-G1431:orf19.1181,LSU-G1431	0.932513	1.00762	11737.5	0.0848137	1.01231	1869.85	1.2275	0.546593
CalR12590C	orf19.5843	0.975734	1.0078	12859.8	0.047421	0.959679	1308.97	1.2275	0.441942
Cal212130W	orf19.3569	0.915168	1.00666	11389.4	0.109098	1.01205	2189.11	1.227	1.08753
Cal113730C	orf19.2434	0.938751	1.00834	11870.5	0.0849931	1.01279	1872.24	1.2265	0.487197
Cal210250C	orf19.4495	0.966271	1.0083	12561.8	0.0857322	1.01244	1882.2	1.2265	0.371231
Cal309240W	orf19.2803	0.959842	1.00776	12382.9	0.0857398	1.0117	1882.3	1.2265	0.171827
Cal311850W	orf19.5995	0.949531	1.00782	12119.8	0.0854727	1.01267	1878.77	1.2265	0.352846
Cal700150W	orf19.7115	0.942501	1.00841	11954.7	0.0457854	0.953204	1281.26	1.2265	0.966615
Cal205440W	tV(AAC)1,tV(AAC)2,tV(AAC)5,tV(AAC)6,tV(AAC)3,tV(AAC)4	0.950526	1.00843	12143.7	0.0955231	1.00591	2013.2	1.226	0.726906
Cal206470C	orf19.5813	0.958116	1.00829	12337.7	0.0904362	1.01269	1946.07	1.226	0.596798
CalR14470C	orf19.716	0.788682	1.00158	9447.33	0.0679213	1.00529	1629.07	1.2255	1.31451
Cal109930C	orf19.5196	0.929512	1.00768	11674.5	0.0851546	1.01305	1874.42	1.225	0.571342
CalR00960W	orf19.7498:orf19.7497	0.96839	1.00891	12624.7	0.0472333	0.957217	1305.95	1.2245	0.61589
Cal313750C	orf19.7374	0.96417	1.00829	12502.1	0.0925928	1.01335	1974.78	1.224	0.0763676
Cal312820W	orf19.6993	0.84333	1.00335	10203.1	0.0750041	1.00167	1731.9	1.2235	1.08965
Cal708440W	orf19.7197	0.966995	1.00848	12584.3	0.0871304	1.0157	1901.07	1.2235	0.260922
Cal511750C	orf19.4025	0.9696	1.00894	12660.4	0.0419365	0.936302	1215.65	1.223	0.612354
Cal314420W	orf19.7417,orf19.7398.1	0.773694	0.999984	9253.48	0.0675652	1.00722	1623.89	1.2215	1.36118
Cal211030W	orf19.4123	0.959209	1.00805	12366.2	0.0869945	1.01575	1899.33	1.2215	0.170413
Cal413860W	orf19.2917.1	0.950197	1.0083	12136.1	0.0209227	0.8662	805.96	1.221	0.92631
Cal511180C	orf19.3994	0.966353	1.00831	12564.2	0.0874686	1.01232	1905.8	1.221	0.312541
Cal602910W	orf19.3448	0.730402	1.0028	8724.97	0.0639828	1.00337	1570.75	1.2195	1.50543
Cal128860W	orf19.3757	0.954738	1.0081	12248.3	0.0869427	1.01679	1898.62	1.219	0.255973
Cal208820W	orf19.832	0.642985	1.0016	7737.09	0.0560317	0.968854	1449.62	1.219	1.76352
Cal303210W	orf19.1710	0.613178	0.997973	7418.83	0.0529137	0.95601	1399.46	1.2185	1.84484
Cal415620W	orf19.3109	0.753471	1.00264	9002.5	0.00935059	0.732378	507.664	1.2185	1.86605
CalR05980C	snR5c	0.570342	0.997617	6974.74	0.0493202	0.956693	1340.73	1.2185	1.96364
Cal700550W	orf19.7096:orf19.7095	0.96508	1.00851	12528	0.0914527	1.01466	1959.22	1.218	0.138593
Cal401750W	orf19.4160:orf19.4159	0.611266	0.998336	7398.1	0.0525355	0.961162	1393.27	1.2175	1.84908
CalR14900C	orf19.700	0.34796	1.00437	4757.62	0.032107	0.903359	1035.55	1.2175	2.59155
Cal505320W	orf19.4252:orf19.4253	0.948273	1.00848	12088.9	0.0872698	1.01488	1902.97	1.217	0.353553
Cal403600W	snR77b	0.919235	1.00617	11467.1	0.0862084	1.01393	1888.76	1.2155	0.644174
Cal212470C	orf19.6869	0.947549	1.00896	12072.2	0.087608	1.01231	1907.63	1.215	0.35921
Cal113070C	orf19.2467	0.232954	1.00611	3591.84	0.0254251	0.894199	903.228	1.215	3.03773
Cal313780W	orf19.7375:orf19.7376	0.936603	1.00902	11824.4	0.0879827	1.0118	1912.84	1.2145	0.485782
Cal305240C	orf19.1620	0.96352	1.00804	12483.1	0.0896032	1.01275	1934.94	1.214	0.00848534
Cal408790W	orf19.1595	0.965967	1.00864	12552.7	0.089697	1.01145	1936.26	1.2135	0.238295
CalR13880C	snR57b	0.904922	1.0057	11199	0.0852664	1.01106	1875.98	1.2135	0.747412
Cal109860C	orf19.5201	0.963946	1.00827	12494.9	0.093588	1.01201	1988	1.213	0.110309
Cal305610W	orf19.1606	0.992195	1.00566	13578.3	0.0148109	0.809849	659.454	1.213	NaN
Cal103770C	orf19.4551	0.922271	1.00691	11526.7	0.0872547	1.01552	1902.78	1.212	0.613769
Cal112070W	orf19.431,orf19.430	0.526046	0.992371	6524.63	0.177107	1.02775	2989.52	1.212	2.40133
CalR23890W	orf19.7670	0.935752	1.00871	11806	0.101703	1.00387	2093.62	1.212	0.886712
CalR02380W	orf19.3254,orf19.3252	0.922727	1.0068	11536	0.0358992	0.922305	1107.54	1.212	1.12996
Cal222170W	orf19.1364	0.944781	1.00898	12008.3	0.0980414	1.00896	2046.35	1.211	0.78206
CalR02510W	orf19.3247	0.962479	1.00805	12453.8	0.0502843	0.958711	1356.27	1.2105	0.689429
Cal204960W	orf19.1543	0.964097	1.00828	12499.4	0.0904817	1.01242	1946.72	1.21	0.0381838
Cal316090C	orf19.6814	0.964787	1.00828	12519.5	0.089844	1.01075	1938.09	1.21	0.0622254
Cal505400C	orf19.4258	0.955435	1.00818	12266.3	0.0892588	1.01599	1930.28	1.21	0.219203
Cal104950W	orf19.3681	0.957703	1.00815	12326.9	0.0894803	1.01295	1933.34	1.2095	0.170413
CalR13280W	orf19.459:orf19.458.1	0.936164	1.00885	11815	0.0892733	1.01536	1930.49	1.2095	0.478711
Cal209890W	orf19.4513	0.619463	1.00101	7485.22	0.0558585	0.96817	1446.74	1.209	1.81444
Cal104860C	orf19.3677,orf19.3678	0.960398	1.00776	12397.2	0.0900683	1.01091	1940.99	1.2085	0.0997021
Cal212300W	orf19.3575	0.962685	1.00797	12459.9	0.0890642	1.01778	1927.86	1.208	0.445477
Cal609550W	orf19.1082.1	0.970751	1.00862	12696.7	0.0491518	0.955987	1338.14	1.208	0.53033
Cal223630W	tV(UAC)1:tF(GAA)4	0.904786	1.00594	11196.3	0.114087	1.02044	2251.14	1.2075	1.13632
Cal302460C	orf19.2513	0.662423	1.00016	7950.02	0.0593478	0.9828	1501.22	1.2065	1.69352
Cal706470C	orf19.5161,orf19.5160	0.969941	1.00886	12671.3	0.0480207	0.955797	1319.05	1.2065	0.559321
Cal219300W	orf19.3617	0.96097	1.00763	12412.9	0.0916881	1.01262	1962.44	1.2055	0.0601041
Cal302570W	orf19.158	0.964598	1.0083	12514.5	0.0918841	1.0117	1965.25	1.205	0.284257
Cal512090W	orf19.4051	0.913818	1.00655	11363.8	0.0207826	0.865345	802.695	1.204	1.1936
Cal316190W	orf19.6810,orf19.6809	0.918259	1.0064	11447.7	0.0511518	0.95761	1370.45	1.2035	1.13066
Cal602160W	orf19.101	0.961573	1.00761	12429.9	0.0974631	1.00802	2039	1.203	0.0608112
Cal109780C	orf19.1070	0.957117	1.00819	12310.8	0.0932678	1.01156	1983.82	1.203	0.5671
CalR15730C	orf19.2362	0.963151	1.00802	12473	0.0914672	1.01405	1959.44	1.2025	0.385373
Cal403630C	orf19.4628	0.8774	1.00423	10728.4	0.0179848	0.860066	739.032	1.202	1.393
Cal411720W	orf19.6859,orf19.6860	0.972567	1.0079	12755.3	0.0508178	0.956299	1364.69	1.202	0.468105
Cal115580W	orf19.6222	0.949485	1.00791	12118.7	0.0958144	1.00751	2016.89	1.202	0.708521
Cal601980W	orf19.93	0.375346	0.998489	5028.82	0.00363216	0.537041	298.689	1.2015	2.79802
Cal132170C	orf19.7210	0.946251	1.00914	12042.2	0.101373	1.00335	2089.42	1.2005	0.729027
Cal603100W	orf19.3441	0.96152	1.0077	12428.2	0.0977978	1.01004	2043.14	1.2005	0.0700036
Cal115620W	orf19.6220.3	0.953977	1.00855	12228.1	0.0954769	1.00615	2012.63	1.2	0.622254
Cal706050C	orf19.5179	0.933487	1.00799	11757.5	0.0485224	0.953989	1327.31	1.1995	1.00763
Cal202710C	orf19.1995	0.950998	1.00834	12155.6	0.0921981	1.01132	1969.3	1.198	0.26163
Cal223270W	orf19.1748	0.852707	1.00404	10342	0.121684	1.01801	2346.16	1.1975	1.42199
Cal212140C	orf19.3571	0.918132	1.00649	11445.4	0.0900628	1.01164	1940.86	1.1965	0.620133
Cal415690C	orf19.3105	0.960697	1.00793	12405.5	0.0942312	1.00694	1996.77	1.195	0.0226274
CalR18380W	orf19.6376	0.963995	1.00825	12496.4	0.0939986	1.00817	1993.73	1.195	0.223446
CalR22830W	orf19.7600:orf19.7601	0.959971	1.00768	12386.5	0.0941083	1.00711	1995.18	1.195	0.0480832
Cal508450W	orf19.1111:orf19.1110	0.904743	1.00604	11195.5	0.0211518	0.860927	811.247	1.1945	1.23249
Cal508810W	orf19.3213	0.888208	1.00587	10906.6	0.0883672	1.01381	1917.94	1.1945	0.81388
Cal213290C	orf19.5213	0.955961	1.00785	12280.2	0.0952643	1.00684	2009.72	1.194	0.5671
Cal109230W	orf19.1043	0.343522	1.00457	4713.89	0.0343699	0.908796	1079.5	1.1935	2.57316
Cal316100W	orf19.6814	0.908382	1.00569	11262.7	0.0530393	0.953524	1401.45	1.1935	1.18158
Cal208920C	orf19.827.1	0.904448	1.0061	11189.9	0.115391	1.02015	2267.53	1.193	1.11723
Cal112350C	orf19.416	0.943216	1.0085	11971.6	0.10403	1.00964	2123.48	1.1925	0.753069
Cal202270W	orf19.2016	0.947865	1.00886	12079.3	0.093109	1.0144	1981.73	1.1925	0.299106
Cal112040C	orf19.431	0.950687	1.0083	12147.8	0.0984679	1.00763	2051.84	1.192	0.656195
Cal206190C	orf19.5824	0.961563	1.00767	12429.5	0.0937336	1.01132	1990.01	1.192	0.404465
Cal704180W	orf19.6527	0.909168	1.00548	11276.9	0.0530897	0.953247	1402.32	1.1915	1.1745
Cal204420W	orf19.1522	0.626321	1.00203	7558.46	0.0587184	0.980219	1491.27	1.1915	1.76847
Cal406610C	orf19.2695,orf19.2694	0.883369	1.00518	10825.2	0.0894368	1.01324	1932.66	1.1915	0.833679
Cal410070W	orf19.3840	0.916941	1.00655	11422.9	0.0912968	1.01526	1957.33	1.1915	0.621547
CalR03790W	orf19.2557:orf19.2558	0.818778	1.00187	9853.78	0.0788371	0.989048	1787.57	1.191	1.14127
CalR10230W	orf19.548:orf19.549	0.942731	1.00828	11960.3	0.0227916	0.873677	846.812	1.1905	0.951059
Cal315350W	orf19.7447	0.961874	1.00778	12438.4	0.0951918	1.00681	2008.9	1.19	0.35921
Cal407580C	orf19.3367	0.953411	1.00854	12213.6	0.0245487	0.88047	884.982	1.19	0.844286
Cal507970C	orf19.6674	0.947095	1.009	12061.5	0.023873	0.873535	870.388	1.1895	0.905804
Cal304380W	orf19.1659	0.840141	1.00285	10156.2	0.0807019	0.997756	1814.13	1.1895	1.04864
Cal131440W	orf19.5007	0.754297	1.00292	9012.56	0.153158	1.02506	2719.31	1.1885	1.75009
Cal206500W	orf19.5812:orf19.5811	0.917821	1.00645	11439.4	0.11116	1.01558	2214.63	1.1885	1.00904
Cal304560W	orf19.1654	0.93644	1.009	11821	0.0939006	1.01011	1992.45	1.186	0.429921
Cal408870W	orf19.789	0.888331	1.00578	10908.8	0.0901222	1.01074	1941.67	1.186	0.799031
Cal603570W	orf19.3426	0.958986	1.00803	12360.8	0.102043	1.00517	2097.89	1.186	0.0410123
Cal501400W	orf19.926	0.962353	1.00799	12450.5	0.0942919	1.0061	1997.45	1.1855	0.0558614
Cal404890C	orf19.4568	0.95542	1.00823	12265.8	0.095432	1.00641	2011.97	1.185	0.147078
Cal202870W	orf19.1990	0.951054	1.00832	12156.9	0.0961125	1.00626	2020.72	1.184	0.223446
Cal304150W	orf19.1667	0.907595	1.00612	11248.3	0.114719	1.0198	2259.15	1.184	1.08046
Cal408480C	orf19.1300	0.782498	1.00056	9366.54	0.0758999	0.996187	1745.47	1.1835	1.26926
Cal130580W	orf19.4961	0.960919	1.00765	12411.7	0.0971567	1.00701	2034.83	1.183	0.360624
CalR15250C	orf19.1852	0.935142	1.0088	11793.3	0.0947398	1.0057	2003.07	1.182	0.436992
Cal109190W	orf19.1041	0.784505	1.00119	9393.23	0.301729	1.01676	4299.71	1.181	NaN
Cal124010W	orf19.4912	0.87334	1.00442	10662.2	0.0892326	1.01729	1929.94	1.181	0.87257
Cal316430C	orf19.6797	0.908578	1.00544	11266.3	0.0931698	1.01278	1982.61	1.181	0.661852
Cal303350W	orf19.1704	0.906224	1.00576	11223.5	0.115372	1.0206	2267.27	1.1805	1.08541
Cal216770C	orf19.1883	0.960781	1.00794	12407.6	0.0982277	1.01016	2048.73	1.18	0.340825
CalR01850W	orf19.3278	0.98946	1.00669	13426.3	0.0252588	0.894865	899.45	1.18	NaN
Cal509590W	orf19.3912	0.966872	1.00857	12580	0.0433209	0.942523	1239.68	1.1795	0.600334
Cal105890W	orf19.2953:orf19.2954	0.937714	1.0088	11847.2	0.104453	1.00902	2128.87	1.179	0.810344
Cal509730W	orf19.3921	0.864979	1.00349	10529	0.0190897	0.853735	764.441	1.1785	1.42058
Cal120580C	orf19.4763:orf19.4764	0.941395	1.00819	11929.3	0.096285	1.00734	2022.98	1.1785	0.354261
Cal107920W	orf19.3054	0.824999	1.00262	9941.56	0.0813803	0.998476	1823.32	1.178	1.0946
Cal401880W	orf19.4706:tG(UCC)2	0.993117	1.00484	13638.8	0.00341615	0.532258	289.164	1.178	NaN
Cal502910W	orf19.1939,orf19.1938	0.946542	1.00893	12049	0.0965576	1.00801	2026.66	1.178	0.284257
Cal505480W	orf19.4263	0.955212	1.00831	12260.2	0.0980076	1.01005	2045.84	1.178	0.123037
Cal311560W	orf19.5976	0.944651	1.00892	12005.4	0.0967322	1.00766	2029.2	1.176	0.309713
CalR09470C	orf19.508	0.95745	1.00832	12320.2	0.0461898	0.950696	1288.29	1.1755	0.726199
Cal603780C	orf19.3415.1	0.935979	1.0088	11810.9	0.0970946	1.00781	2034.06	1.175	0.408708
Cal702850W	orf19.6916	0.905486	1.00579	11209.5	0.0942029	1.00738	1996.43	1.175	0.671751
Cal600550W	orf19.1187	0.935536	1.00855	11801.4	0.0969669	1.00793	2032.26	1.174	0.414365
CalR10490C	tS(GCU)2	0.95861	1.00807	12351.1	0.0461015	0.951581	1286.39	1.174	0.707107
Cal301020W	orf19.5417,orf19.5416	0.926974	1.00726	11621.7	0.0970863	1.00844	2033.93	1.1735	0.497096
Cal602940W	orf19.3447	0.900761	1.00555	11125.1	0.0936832	1.01153	1989.32	1.1735	0.7064
CalR21920W	orf19.7552:orf19.7553	0.887295	1.00547	10890.9	0.121026	1.01839	2337.83	1.1735	1.19572
Cal209980W	orf19.4509	0.959435	1.00777	12372.1	0.0994444	1.00907	2064.21	1.173	0.379009
Cal603600W	orf19.3425	0.871042	1.00401	10625.5	0.0920773	1.01076	1967.75	1.1725	0.869034
Cal214670W	snR8b	0.960887	1.00776	12410.7	0.100245	1.00662	2074.82	1.1715	0.25668
Cal605350W	orf19.3482	0.955986	1.0078	12281	0.106898	1.01172	2160.02	1.1715	0.0106066
CalR13960C	orf19.3876:orf19.3877	0.952953	1.00857	12201.8	0.0994879	1.0081	2064.88	1.1715	0.152028
Cal108880C	orf19.4471	0.951902	1.00878	12177	0.100366	1.00575	2076.37	1.171	0.59397
Cal223960W	orf19.5346	0.959641	1.0077	12377.7	0.100636	1.00497	2079.83	1.171	0.339411
Cal215650W	orf19.2251	0.959325	1.00795	12369.1	0.10021	1.00767	2074.48	1.1705	0.365574
Cal218560W	orf19.1354	0.957177	1.00818	12312.5	0.100654	1.00446	2080.02	1.1705	0.0304056
Cal303050C	orf19.1716	0.883123	1.00522	10820.9	0.0931815	1.01214	1982.82	1.1705	0.802566
Cal414300C	orf19.2892	0.959584	1.00778	12376.1	0.101028	1.00404	2084.78	1.1705	0.331633
Cal602390W	orf19.117	0.943021	1.00852	11966.9	0.0984362	1.00801	2051.45	1.17	0.31537
Cal112650W	orf19.2492	0.93456	1.00877	11780.7	0.098412	1.00919	2051.15	1.1695	0.413658
Cal400480W	orf19.5648	0.958703	1.00803	12353.3	0.10021	1.00836	2074.48	1.1695	0.389616
Cal512020W	orf19.4045:orf19.4044,orf19.4046	0.960634	1.00794	12403.9	0.10087	1.00454	2082.72	1.1695	0.252437
Cal100410W	orf19.6084	0.952417	1.00896	12189.3	0.0997723	1.00816	2068.48	1.169	0.159806
Cal201730C	orf19.2041	0.904375	1.0061	11188.6	0.0958454	1.00711	2017.33	1.168	0.670337
Cal415310W	orf19.3125	0.967284	1.00849	12591.9	0.0549614	0.967667	1432.53	1.168	0.524673
Cal504140W	orf19.3187,orf19.3185	0.919569	1.00616	11473.2	0.0229683	0.87123	850.68	1.168	1.10591
Cal317190W	orf19.6757	0.960283	1.00779	12394.4	0.101883	1.00496	2095.74	1.167	0.179605
Cal109680W	orf19.1065	0.953994	1.00849	12228.5	0.100002	1.00767	2071.68	1.1665	0.539522
Cal507050W	orf19.2655	0.957551	1.00821	12323	0.105462	1.01068	2141.24	1.166	0.0664681
Cal214520W	tI(AAU)1	0.892622	1.00592	10982.2	0.0953375	1.00688	2010.74	1.165	0.741048
CalR14860C	orf19.699	0.863379	1.00364	10504.1	0.0915169	1.01305	1960.06	1.163	0.900854
Cal201040C	orf19.2075	0.955447	1.00811	12266.6	0.0993285	1.00931	2062.69	1.1625	0.505581
Cal316800W	orf19.6782	0.650694	1.00091	7822	0.0655211	1.00253	1593.28	1.1625	1.65675
CalR17480W	orf19.2633	0.698629	1.001	8355.76	0.154021	1.02515	2729.37	1.1625	1.89151
Cal106060C	orf19.2960	0.955214	1.00823	12260.3	0.0994182	1.00951	2063.88	1.162	0.509117
Cal400430W	orf19.5645:orf19.5646	0.735725	1.00175	8788.48	0.0750152	1.00089	1732.04	1.162	1.81444
Cal607540W	orf19.5626	0.957496	1.00822	12321.6	0.102627	1.00886	2105.53	1.1615	0.39103
Cal705780W	orf19.3700	0.959494	1.00776	12373.7	0.103404	1.01101	2115.37	1.1615	0.168998
Cal133050C	orf19.7263	0.955572	1.00802	12269.7	0.100729	1.00452	2080.93	1.1605	0.484368
CalR13080C	orf19.6627	0.955772	1.00802	12275	0.10811	1.01001	2176.38	1.1605	0.0360624
CalR08900W	orf19.470	0.830705	1.00232	10022.5	0.0858689	1.01076	1884.07	1.16	1.04228
Cal304860W	orf19.1637,orf19.1636	0.950908	1.00832	12153.5	0.102921	1.01039	2109.18	1.1595	0.153442
Cal405750W	orf19.2746	0.90003	1.00574	11112.9	0.0973002	1.00706	2036.6	1.1595	0.686601
Cal705010C	orf19.6482	0.850344	1.00403	10307.1	0.0630242	1.00464	1556.3	1.1595	1.43048
Cal408080C	orf19.1314	0.958138	1.00824	12338.2	0.104033	1.009	2123.55	1.1585	0.328805
Cal500080C	orf19.5698	0.881264	1.00492	10790.2	0.0224161	0.877865	838.719	1.1585	1.30603
CalR03100W	orf19.2517	0.372957	1.0004	5004.95	0.0380193	0.933729	1145.97	1.1585	2.43174
Cal215120W	orf19.3149	0.947313	1.00894	12066.3	0.104057	1.00856	2123.87	1.158	0.642053
Cal503130W	orf19.1926	0.911491	1.00598	11319.7	0.0978799	1.00945	2044.2	1.158	0.602455
Cal219660C	orf19.3600	0.572139	0.99823	6993.66	0.0589779	0.98116	1495.24	1.1575	1.86747
Cal401060W	orf19.5677	0.962548	1.00797	12455.6	0.0557695	0.973614	1445.35	1.157	0.598212
Cal410780W	orf19.3802	0.955314	1.00827	12262.8	0.0480863	0.953174	1320.1	1.157	0.724077
Cal707900C	orf19.6691	0.964453	1.00836	12510.3	0.0564293	0.972247	1455.81	1.156	0.5572
Cal102600W	orf19.3308	0.954329	1.0084	12237.6	0.103611	1.00964	2118.12	1.1545	0.485782
Cal202530W	orf19.2003	0.831918	1.00237	10039.9	0.0872871	1.01427	1903.19	1.1545	1.02884
Cal404970C	orf19.4565	0.948468	1.00839	12093.6	0.0479296	0.956612	1317.52	1.1545	0.802566
Cal116020W	orf19.6197	0.900427	1.00564	11119.6	0.0990228	1.00832	2058.93	1.154	0.671751
Cal600670C	orf19.1195	0.924078	1.00653	11563.3	0.10132	1.00488	2088.59	1.154	0.486489
Cal504990W	orf19.4234	0.891017	1.0056	10954.4	0.0233264	0.877922	858.44	1.1535	1.25087
Cal607900C	orf19.5719	0.65285	1.00061	7846.09	0.0570476	0.974788	1465.6	1.153	2.0294
Cal119600W	orf19.407	0.958355	1.00825	12344	0.105863	1.01185	2146.73	1.1525	0.190212
Cal506850W	orf19.4340.1:orf19.4341	0.884739	1.00493	10848.4	0.0231794	0.876945	855.14	1.152	1.28128
Cal202060C	orf19.2023	0.957618	1.0082	12324.8	0.10652	1.01079	2155.01	1.1515	0.123744
Cal213390W	orf19.5216	0.941959	1.00827	11942.3	0.103433	1.01062	2115.7	1.1515	0.286378
CalR00570C	orf19.7513	0.957492	1.00829	12321.4	0.106044	1.01157	2148.91	1.1515	0.0968737
Cal118080W	orf19.5068	0.894646	1.00663	11017.6	0.0988006	1.00818	2056.03	1.151	0.704278
Cal100190C	orf19.6102,orf19.6103	0.958665	1.00806	12352.3	0.101133	1.00439	2086.13	1.1505	0.0586899
Cal208040C	orf19.862	0.669781	1.00135	8032.49	0.160053	1.0312	2798.6	1.15	1.95303
Cal111220C	orf19.50,orf19.51	0.948837	1.00804	12102.7	0.104794	1.00961	2133.11	1.149	0.595384
Cal100030W	orf19.6114	0.858807	1.00323	10433.9	0.131527	1.01266	2466.08	1.148	1.30673
CalR16310C	orf19.6143	0.851731	1.00379	10328	0.0939117	1.00873	1992.59	1.148	0.929138
CalR22920W	orf19.7605	0.956965	1.0081	12306.4	0.103513	1.00935	2116.82	1.1475	0.0289914
Cal201080C	orf19.2073	0.952744	1.00879	12196.8	0.104222	1.00813	2125.94	1.147	0.509117
Cal207890C	orf19.871	0.849337	1.00366	10291.6	0.0931546	1.01337	1982.33	1.147	0.939038
Cal313080W	orf19.7347	0.890973	1.00562	10953.6	0.0571856	0.974847	1467.77	1.1465	1.2141
Cal219030W	orf19.3629	0.94025	1.0086	11903.4	0.109161	1.012	2189.86	1.1465	0.709228
Cal409320W	orf19.5295	0.956406	1.00802	12291.9	0.107276	1.012	2165.09	1.1465	0.340118
Cal305980W	orf19.244:orf19.245	0.806521	1.00073	9686.26	0.0568385	0.972361	1462.53	1.145	1.57261
Cal209370W	orf19.804.1	0.927824	1.00743	11638.8	0.103954	1.00958	2122.64	1.144	0.429921
Cal130610C	orf19.4962	0.853458	1.0037	10353.1	0.0963775	1.00758	2024.12	1.1435	0.912875
Cal217670C	orf19.2193	0.917373	1.00626	11431.2	0.117335	1.01686	2291.96	1.1435	0.932674
Cal507060C	orf19.2655	0.687339	1.00005	8227.76	0.0719296	1.00121	1687.85	1.143	1.52311
Cal607050W	orf19.5602	0.723926	1.00217	8649.02	0.347355	1.0119	4751.84	1.143	NaN
Cal504430W	orf19.3171	0.916172	1.00685	11407.6	0.103801	1.01013	2120.61	1.1425	0.532451
Cal120370W	orf19.4754	0.954535	1.00825	12242.9	0.107531	1.01177	2168.56	1.1425	0.410829
Cal308650W	orf19.6942	0.911293	1.00584	11315.6	0.103463	1.01023	2116.16	1.1425	0.573464
Cal507720W	orf19.6660	0.956587	1.00807	12296.6	0.109014	1.01322	2188.19	1.142	0.145664
Cal605050W	orf19.3468	0.95935	1.0079	12369.9	0.0577108	0.976904	1475.66	1.142	0.62084
Cal209570W	orf19.793	0.472662	0.998379	5989.46	0.0501567	0.957536	1354.37	1.141	2.11849
Cal500370W	orf19.980	0.952474	1.0088	12190.5	0.108448	1.01185	2180.81	1.141	0.0509117
Cal121120C	orf19.4785,orf19.4786	0.927879	1.00726	11640	0.105315	1.00994	2139.34	1.1405	0.419314
CalR21420C	orf19.6601.1	0.523491	0.994023	6498.6	0.0555252	0.972866	1441.25	1.1405	1.97919
Cal303400W	orf19.1701:orf19.1700	0.948494	1.00834	12094.2	0.108353	1.01162	2179.58	1.14	0.138593
Cal108570W	orf19.1028	0.953099	1.00865	12205.5	0.106227	1.01199	2151.5	1.14	0.475176
Cal126400W	orf19.655	0.925803	1.00697	11597.7	0.104809	1.00909	2133.34	1.14	0.442649
CalR10530C	tS(GCU)1:orf19.1735	0.873199	1.0045	10660.1	0.0999268	1.00831	2070.77	1.14	0.806102
Cal502990W	orf19.1934	0.84991	1.00393	10300.5	0.0964072	1.00717	2024.52	1.1395	0.924189
CalR03030W	orf19.3222	0.956376	1.00807	12291.1	0.109731	1.01274	2197.34	1.1395	0.241123
Cal109180C	orf19.1041	0.483435	0.997434	6096.89	0.0519434	0.958803	1383.99	1.139	2.08738
Cal300620C	orf19.5438	0.935534	1.00862	11801.4	0.106896	1.01237	2160	1.1375	0.330219
CalR10930W	orf19.6307	0.937196	1.00861	11836.9	0.107386	1.01237	2166.51	1.1365	0.307591
Cal403250W	orf19.4641	0.533068	0.994228	6595.14	0.422906	1.01221	5498.78	1.136	NaN
Cal403460C	orf19.4629	0.644254	1.00164	7750.62	0.0695293	1.00447	1652.66	1.136	1.63766
Cal202080W	orf19.2023	0.955642	1.00803	12271.5	0.111297	1.01492	2216.37	1.1355	0.245366
Cal302650W	orf19.3156	0.955651	1.00796	12271.9	0.111197	1.01527	2215.06	1.1355	0.156271
Cal509290W	orf19.3900	0.954486	1.00842	12241.6	0.110261	1.0144	2204.23	1.1355	0.359917
Cal127260W	tY(GUA)4	0.9468	1.00898	12055.1	0.107826	1.01126	2172.37	1.135	0.59397
Cal129190C	orf19.6347	0.949141	1.00799	12110.3	0.106279	1.01115	2152.27	1.135	0.562857
Cal124900C	orf19.2337	0.899161	1.0057	11097.7	0.122199	1.01938	2352.55	1.1345	1.06137
Cal206680C	orf19.5802	0.932246	1.00778	11731.6	0.106813	1.01224	2159.02	1.1345	0.366988
Cal706560W	orf19.5156	0.95411	1.00839	12231.6	0.111153	1.01616	2214.59	1.133	0.357796
CalR05690W	orf19.169	0.829866	1.00256	10010.6	0.0926798	1.01277	1975.87	1.1325	1.00197
Cal106670C	orf19.2990	0.867214	1.00319	10564.2	0.131468	1.01328	2465.39	1.132	1.23885
Cal309350W	orf19.5854.1	0.935087	1.00882	11792.2	0.0406011	0.933825	1192.09	1.132	0.910754
Cal601420W	orf19.3658	0.909458	1.0055	11282.3	0.0249503	0.88828	893.331	1.132	1.11581
Cal116240C	orf19.4450	0.834779	1.00257	10080.4	0.0942726	1.00664	1997.2	1.1315	0.982171
Cal219180W	orf19.3624:orf19.3623	0.860553	1.00317	10460.4	0.131562	1.01186	2466.58	1.131	1.27138
Cal220520W	orf19.4067	0.945249	1.00889	12019.3	0.10896	1.01337	2187.48	1.1305	0.613062
CalR01940W	orf19.3272,orf19.3271	0.928372	1.0075	11650.6	0.0366929	0.919862	1122.09	1.1305	0.968029
Cal301510W	orf19.5389	0.900235	1.00574	11116.1	0.104324	1.00845	2127.16	1.13	0.632153
Cal700300W	orf19.7108	0.954496	1.00836	12241.8	0.11253	1.01656	2231.69	1.13	0.108894
CalR22800C	orf19.7599	0.91435	1.00668	11373.6	0.106349	1.01049	2152.98	1.1295	0.52538
Cal606260C	orf19.5557	0.913747	1.00655	11362.4	0.0250449	0.889461	895.369	1.1295	1.08541
Cal309500W	orf19.5860	0.924124	1.00651	11564.4	0.107619	1.01194	2169.75	1.129	0.435578
Cal610290W	orf19.2154	0.93591	1.0088	11809.4	0.0531801	0.953688	1403.76	1.1285	0.878934
Cal701680W	orf19.7038	0.952561	1.00874	12192.4	0.111952	1.0164	2224.5	1.1285	0.400929
Cal202320W	orf19.2014,orf19.2013	0.629417	1.00245	7590.87	0.0691808	1.00545	1647.7	1.1275	1.66524
Cal602410C	orf19.118	0.942544	1.0083	11955.7	0.111535	1.01453	2219.38	1.1275	0.205768
Cal118810W	orf19.5106,orf19.5107	0.782242	1.00068	9363.25	0.0872968	1.01275	1903.32	1.127	1.18511
Cal128990W	orf19.6357	0.954507	1.0083	12242.1	0.113168	1.01978	2239.66	1.127	0.132936
Cal311970C	orf19.6001	0.955551	1.00808	12269.2	0.0598095	0.9837	1508.27	1.127	0.644881
Cal502310W	orf19.1967	0.931985	1.00795	11726.2	0.0282995	0.889501	962.518	1.127	0.94328
CalR12560C	tC(GCA)1	0.930163	1.00763	11687.9	0.0279793	0.889079	956.175	1.126	0.958837
Cal116650C	orf19.4436	0.823438	1.00282	9918.83	0.0934431	1.0112	1986.28	1.126	1.01823
Cal122560W	orf19.4855	0.925624	1.00708	11593.9	0.108641	1.01235	2183.28	1.126	0.41295
Cal708420W	orf19.7198	0.812395	1.00209	9765.4	0.0917053	1.01204	1962.74	1.126	1.0649
Cal213850W	orf19.5479,orf19.5480	0.914979	1.00653	11385.8	0.107651	1.01093	2170.17	1.1255	0.509824
CalR03970W	orf19.2571	0.954658	1.00824	12246	0.11336	1.01897	2241.88	1.1255	0.242538
Cal510940C	orf19.3981	0.954122	1.00833	12231.9	0.0588965	0.980931	1493.99	1.125	0.667509
Cal705830C	orf19.3698:orf19.3697	0.947204	1.00904	12063.9	0.112692	1.01738	2233.64	1.125	0.114551
Cal131610C	orf19.5016	0.739776	1.00106	8838.07	0.157731	1.02582	2772.21	1.124	1.70696
Cal508520W	orf19.1107	0.915941	1.00667	11403.1	0.0257654	0.891026	910.805	1.124	1.06349
Cal125190W	orf19.2322.3	0.954008	1.00843	12229	0.114421	1.02091	2255.47	1.1235	0.143543
Cal301670C	orf19.5379	0.94099	1.00835	11920.6	0.112375	1.0158	2229.86	1.123	0.649124
CalR11870W	orf19.1007	0.945908	1.00907	12033.8	0.0602333	0.988426	1514.52	1.123	0.759433
Cal205100C	orf19.1552,orf19.1551	0.948363	1.00835	12091.1	0.111224	1.01489	2215.35	1.123	0.524673
Cal211760W	orf19.3553	0.892392	1.00582	10978.2	0.105585	1.00985	2142.86	1.123	0.668923
Cal706960W	orf19.5136,orf19.5134	0.954148	1.00828	12232.5	0.114422	1.0203	2255.51	1.123	0.243245
Cal209600W	orf19.791	0.953968	1.00861	12227.8	0.114982	1.02089	2262.12	1.122	0.179605
Cal507840W	orf19.6667	0.936466	1.00895	11821.6	0.0290939	0.89887	977.819	1.122	0.900854
Cal510380W	orf19.3949	0.955538	1.00814	12268.9	0.0609193	0.99182	1524.9	1.1215	0.632861
Cal128070W	orf19.5241	0.891571	1.00575	10963.4	0.106014	1.01195	2148.52	1.121	0.671751
Cal219230W	orf19.3621	0.829994	1.00239	10012.3	0.0969089	1.00805	2031.57	1.121	0.981464
Cal304420W	orf19.1658	0.95291	1.00867	12200.9	0.115647	1.01868	2270.41	1.1205	0.103945
Cal510650W	orf19.3963	0.952834	1.00874	12199	0.115843	1.01854	2272.9	1.1205	0.105359
Cal415430C	orf19.3120	0.95411	1.00847	12231.6	0.0605901	0.990914	1519.88	1.12	0.654781
Cal129850C	orf19.4931	0.920493	1.00649	11491.3	0.122349	1.0177	2354.43	1.1195	0.85772
Cal600680W	orf19.1195,orf19.1196	0.652672	1.00055	7844.15	0.387785	1.00555	5151.21	1.119	NaN
CalR07190C	orf19.2402	0.945137	1.00892	12016.7	0.122411	1.01763	2355.37	1.119	0.0735391
Cal212520W	orf19.6871	0.94867	1.00808	12098.6	0.111851	1.01676	2223.41	1.1185	0.505581
Cal607010W	orf19.5599	0.953377	1.00857	12212.6	0.11608	1.01816	2276.02	1.1185	0.238295
Cal128270W	orf19.5232	0.95259	1.0087	12193.1	0.116115	1.01785	2276.54	1.118	0.308299
Cal502340W	orf19.1966	0.946389	1.00899	12045.2	0.115516	1.01876	2268.92	1.117	0.0989949
Cal411320W	orf19.3775:orf19.3774.1	0.99266	1.00536	13607.8	0.00213527	0.435775	224.9	1.117	NaN
Cal132850W	orf19.7247	0.871034	1.00408	10625.5	0.131381	1.01369	2464.32	1.1165	1.19572
Cal311410C	orf19.5968	0.726981	1.00295	8684.57	0.0527757	0.958296	1397.25	1.116	1.78757
Cal609620C	orf19.1085	0.951979	1.00871	12178.6	0.116036	1.01901	2275.4	1.116	0.34224
Cal202030C	orf19.2026	0.952521	1.00877	12191.6	0.116444	1.0146	2280.98	1.1155	0.301935
Cal304680C	orf19.1648	0.953357	1.00863	12212	0.116291	1.01571	2278.91	1.1155	0.208597
CalR14080W	orf19.3884,orf19.3885	0.90234	1.00599	11152.8	0.109819	1.01226	2198.52	1.1155	0.584777
Cal511130W	orf19.3990	0.880773	1.00491	10782.5	0.106917	1.01059	2160.29	1.115	0.721249
CalR23950C	orf19.7676	0.848106	1.00343	10273.4	0.13585	1.02046	2517.39	1.114	1.3138
Cal115500W	orf19.6225	0.951364	1.00851	12163.9	0.116825	1.01487	2285.5	1.1135	0.350018
Cal221180W	orf19.1600	0.932195	1.00795	11730.3	0.116589	1.01403	2282.63	1.1135	0.741755
CalR16190W	orf19.6152	0.939441	1.00863	11885.9	0.114181	1.02065	2252.36	1.1135	0.654074
Cal706090W	orf19.5178	0.944293	1.00868	11996.9	0.116434	1.01512	2280.82	1.1125	0.127986
Cal511740W	orf19.4024	0.960847	1.00787	12409.6	0.0633354	1.00518	1560.79	1.112	0.533158
Cal604950W	orf19.3463	0.948293	1.00842	12089.2	0.114538	1.01944	2256.99	1.112	0.482247
CalR09560C	orf19.512	0.940028	1.00852	11898.7	0.115482	1.0197	2268.57	1.112	0.206475
Cal602380C	orf19.115:orf19.117	0.951855	1.0088	12175.8	0.118364	1.01666	2304.62	1.1115	0.132229
Cal130250C	orf19.4950	0.948208	1.00855	12087.5	0.114824	1.02011	2260.42	1.111	0.479418
Cal604170W	orf19.3393	0.842681	1.00299	10193.1	0.102637	1.00828	2105.6	1.111	0.912168
Cal414320C	orf19.2891	0.901171	1.00546	11132.6	0.110604	1.01369	2208.55	1.111	0.588313
Cal507430W	orf19.2640	0.637785	1.00103	7680.79	0.0104127	0.76202	539.941	1.11	2.02515
Cal304100C	orf19.1668	0.934712	1.00886	11783.9	0.116562	1.0144	2282.26	1.109	0.700036
Cal129370C	orf19.4913	0.887573	1.00555	10895.6	0.108463	1.01134	2181	1.1085	0.671044
Cal214570W	orf19.28:orf19.29	0.896665	1.00625	11052.9	0.126086	1.01725	2400.18	1.1085	1.03308
Cal400910W	orf19.5672	0.917504	1.00633	11433.6	0.0557937	0.971695	1445.83	1.108	0.995606
Cal508170W	orf19.1124.2	0.949488	1.00784	12118.8	0.1195	1.02036	2318.2	1.107	0.0367696
Cal503640W	orf19.6294	0.652573	1.00061	7842.91	0.0749482	1.00185	1731.07	1.1065	1.57048
CalR01490C	orf19.7472	0.791551	1.00084	9485.11	0.0484962	0.954769	1326.89	1.1065	1.57331
Cal218670C	orf19.1350	0.976542	1.00777	12888.6	0.0659096	1.00213	1598.94	1.106	NaN
Cal504890C	orf19.4231	0.986966	1.00741	13305.6	0.0328654	0.905361	1050.19	1.106	NaN
CalR21410W	orf19.6602	0.893815	1.00625	11003.3	0.111043	1.0158	2213.4	1.106	0.632153
CalR22570C	orf19.7586	0.951432	1.0085	12165.4	0.120049	1.02144	2325.15	1.106	0.18809
Cal205150W	orf19.1553	0.911088	1.00584	11312	0.112974	1.01867	2237.41	1.105	0.504874
Cal220710C	orf19.4080	0.948252	1.00853	12088.4	0.115484	1.0191	2268.57	1.105	0.0438406
Cal222400C	orf19.1355	0.949379	1.00817	12115.5	0.12036	1.01989	2329.18	1.105	0.0480833
Cal400090C	orf19.364	0.949059	1.00805	12107.9	0.120428	1.01868	2330.21	1.105	0.0381838
Cal506810C	orf19.4340	0.818951	1.00174	9856.47	0.0226715	0.873697	844.066	1.105	1.48775
CalR17530W	orf19.3704.1	0.941554	1.00806	11933.1	0.118418	1.01651	2305.36	1.105	0.154149
CalR03580W	orf19.2545	0.778239	1.00015	9312.42	0.0916177	1.01339	1961.39	1.1045	1.16602
Cal305680W	orf19.230:orf19.231	0.88214	1.00513	10804	0.1097	1.0131	2197	1.104	0.692965
Cal207990W	orf19.866	0.943763	1.00871	11984.6	0.114565	1.01906	2257.35	1.103	0.568514
Cal315050W	tH(GUG)3	0.950852	1.00841	12151.9	0.120824	1.01787	2335.18	1.1025	0.245366
Cal409470C	orf19.5290	0.873155	1.00453	10659.4	0.109422	1.01376	2193.27	1.1025	0.743169
Cal405360C	orf19.2762	0.949612	1.00783	12121.7	0.120683	1.01846	2333.48	1.102	0.336583
Cal708430C	orf19.7197	0.847411	1.00368	10263.1	0.106592	1.01081	2155.99	1.102	0.87257
CalR18240C	orf19.6367	0.948573	1.00828	12096.2	0.121276	1.01931	2341.04	1.102	0.0381837
Cal708390C	orf19.7199	0.940021	1.00858	11898.5	0.119997	1.0216	2324.55	1.101	0.164049
Cal318300W	orf19.6188:orf19.6189	0.947582	1.00885	12073.1	0.0621953	0.999124	1544.21	1.101	0.707107
Cal501420W	orf19.925	0.948596	1.00823	12096.7	0.119778	1.02094	2321.54	1.1005	0.400929
CalR06610W	orf19.2850	0.950348	1.00831	12139.6	0.121389	1.01731	2342.55	1.1	0.270115
CalR09640C	orf19.516	0.878481	1.00443	10745.5	0.110226	1.01473	2203.84	1.1	0.708521
Cal126530W	orf19.1168	0.900122	1.00569	11114.2	0.128023	1.01258	2423.63	1.099	0.991364
Cal131790C	orf19.5024	0.906199	1.00589	11222.9	0.125424	1.01644	2392.14	1.099	0.946109
Cal219630W	orf19.3603	0.759253	1.00215	9073.37	0.0898316	1.01139	1937.99	1.0985	1.22966
Cal106990W	orf19.3004	0.887013	1.00562	10886	0.129874	1.01723	2446	1.098	1.0748
Cal221220W	orf19.1604	0.938728	1.00839	11870	0.119794	1.02047	2321.74	1.098	0.185262
Cal507290W	orf19.2647	0.868777	1.00355	10589	0.109867	1.01206	2199.17	1.098	0.756604
Cal509060C	orf19.1281	0.928488	1.00755	11653	0.0309765	0.901305	1013.37	1.098	0.929138
Cal213020W	orf19.6891	0.77509	1.00036	9271.18	0.0929972	1.01547	1980.23	1.0975	1.1646
Cal108290W	orf19.1133	0.937279	1.00855	11838.9	0.117749	1.01559	2297.19	1.097	0.643467
Cal300500W	orf19.5445	0.936654	1.00893	11825.5	0.120347	1.02038	2329.01	1.097	0.210718
CalR12100C	orf19.5286	0.948028	1.00881	12083.4	0.12143	1.01706	2342.98	1.0965	0.388202
Cal501410C	orf19.925	0.948636	1.00812	12097.7	0.123128	1.0166	2363.96	1.0965	0.0827315
Cal603840C	orf19.3414	0.89736	1.0057	11065.3	0.0269648	0.888	935.62	1.0965	1.13208
Cal102700C	orf19.3312	0.737714	1.00042	8812.86	0.158674	1.02734	2783.43	1.096	1.67443
Cal405370W	orf19.2762	0.74129	1.00152	8855.84	0.0889469	1.01724	1926.21	1.096	1.28411
CalR14430W	orf19.718	0.889529	1.0054	10929.1	0.113327	1.01994	2241.51	1.096	0.639224
Cal205680W	orf19.1585	0.907824	1.00607	11252.5	0.125889	1.01793	2397.92	1.0955	0.929845
Cal408070W	orf19.1317	0.20665	1.00045	3314.59	0.0303464	0.89556	1001.11	1.0955	2.97763
Cal221730C	orf19.1388	0.94897	1.00811	12105.7	0.123992	1.01678	2374.45	1.095	0.130108
Cal313650W	orf19.7369	0.936795	1.00901	11828.3	0.120695	1.01797	2333.59	1.095	0.205061
Cal403850C	orf19.4618	0.917064	1.00646	11425.1	0.0298178	0.89639	991.133	1.0945	1.01046
Cal708270C	orf19.7204	0.918847	1.00613	11459.1	0.117351	1.01638	2292.14	1.0945	0.410829
Cal105460W	orf19.2934:orf19.2935	0.936862	1.00893	11829.7	0.11853	1.01507	2306.82	1.0945	0.641346
CalR01990W	orf19.3268	0.940626	1.00863	11912.3	0.122342	1.01882	2354.37	1.094	0.131522
Cal314690W	orf19.7401	0.594221	1.00015	7221.22	0.0710186	0.997151	1674.57	1.094	1.71544
Cal126730W	orf19.1156	0.932456	1.0077	11736.3	0.120116	1.02141	2325.83	1.0935	0.697914
Cal200240W	orf19.1910	0.906739	1.00602	11232.7	0.126705	1.01434	2407.67	1.093	0.933381
Cal113800C	orf19.2432	0.664592	1.00072	7974.6	0.0785514	0.987173	1783.61	1.093	1.51745
Cal129010W	orf19.6356:orf19.6355	0.931264	1.00762	11711	0.120362	1.01931	2329.24	1.0925	0.710642
Cal211260C	orf19.3529	0.659767	1.00178	7921.66	0.0785293	0.987752	1783.32	1.0925	1.53371
Cal113160C	orf19.2461	0.920715	1.00635	11495.4	0.118479	1.01583	2306.18	1.092	0.387495
Cal115440W	snR44b	0.922281	1.00684	11526.9	0.123483	1.01663	2368.32	1.092	0.799031
CalR12360W	orf19.3519	0.910573	1.00581	11303.1	0.0292981	0.893747	981.46	1.092	1.04793
Cal508900W	orf19.3210	0.946306	1.00905	12043.5	0.0643375	1.00458	1575.87	1.0915	0.700743
Cal122010W	orf19.4826	0.704706	1.00061	8424.9	0.154965	1.02625	2740.13	1.091	1.7706
Cal129290W	orf19.6343,orf19.6342	0.924997	1.00693	11581.9	0.12023	1.02178	2327.3	1.091	0.335169
CalR22380C	orf19.7576	0.938651	1.00853	11867.8	0.122561	1.01597	2357.27	1.091	0.159806
Cal403730W	orf19.4623.3	0.948013	1.00887	12083.1	0.125032	1.01839	2387.49	1.0905	0.103945
CalR12650C	orf19.6650	0.949449	1.0081	12117.5	0.0657088	1.00329	1595.99	1.0905	0.656902
Cal113620W	orf19.2439.1	0.947513	1.00907	12071.3	0.124124	1.01728	2376.1	1.09	0.350725
Cal309620C	orf19.5863	0.94779	1.00885	12077.5	0.124233	1.01702	2377.4	1.09	0.337997
Cal303200C	orf19.1710	0.948792	1.00807	12101.4	0.125136	1.01809	2388.76	1.0895	0.181726
Cal500940C	orf19.944	0.947661	1.00879	12074.9	0.125349	1.01754	2391.34	1.0895	0.0940452
CalR09730C	orf19.522	0.948729	1.00807	12099.9	0.125253	1.01847	2390.3	1.0895	0.222739
Cal124600C	orf19.1836	0.945164	1.00887	12017.4	0.122222	1.01899	2352.86	1.089	0.456791
Cal302300W	orf19.2507	0.937919	1.00887	11851.7	0.122479	1.01761	2356.23	1.089	0.172534
Cal308040W	orf19.345	0.859157	1.00308	10439.5	0.110371	1.01284	2205.6	1.089	0.799031
Cal409270C	orf19.5297	0.930395	1.00766	11692.6	0.0546308	0.967726	1427.16	1.0885	0.866206
Cal404220C	orf19.4600	0.94808	1.00871	12084.5	0.125368	1.01655	2391.59	1.088	0.2885
Cal707870W	orf19.6689	0.343278	1.00446	4711.48	0.0418923	0.936759	1214.89	1.0875	2.42326
CalR08620C	orf19.4378:orf19.4379	0.939489	1.00861	11887.2	0.131134	1.01448	2461.68	1.0875	0.08556
Cal603630W	orf19.3423	0.871305	1.00399	10629.7	0.0269331	0.888975	934.935	1.0865	1.25653
CalR01970W	orf19.3269	0.836821	1.00302	10109.1	0.047755	0.958407	1314.53	1.0865	1.38381
CalR04550C	orf19.2608	0.945972	1.00907	12035.2	0.124362	1.01636	2378.89	1.0865	0.405172
CalR19570W	tG(GCC)6	0.948053	1.00876	12084	0.126637	1.01436	2406.88	1.0865	0.210011
Cal123450W	orf19.4890	0.981137	1.0077	13057.8	0.049735	0.958325	1347.69	1.086	NaN
Cal317510W	orf19.6738	0.947241	1.00901	12064.8	0.126878	1.01404	2409.89	1.0855	0.113844
Cal116870W	orf19.4426	0.98354	1.00796	13155.8	0.0445832	0.94862	1260.86	1.085	NaN
Cal213950C	orf19.5486.1	0.947988	1.00891	12082.7	0.117605	1.01677	2295.33	1.085	0.0014142
Cal407040W	orf19.2673	0.947572	1.00891	12072.7	0.125946	1.01726	2398.6	1.085	0.301227
Cal609670C	orf19.1087	0.947002	1.00897	12059.4	0.12691	1.01374	2410.26	1.085	0.101823
Cal313700C	orf19.7371	0.64331	1.00124	7740.36	0.0779765	0.991123	1775.38	1.085	1.56553
Cal501450C	orf19.922	0.943137	1.00849	11969.9	0.122545	1.01641	2357.07	1.0845	0.49851
Cal603270C	orf19.3434	0.789369	1.00148	9456.66	0.098403	1.00982	2051.05	1.0845	1.09531
Cal207660W	orf19.882	0.886297	1.00536	10874.3	0.116514	1.0146	2281.69	1.084	0.634982
Cal506450W	orf19.4318	0.791874	1.0002	9489.33	0.0991636	1.00904	2060.63	1.084	1.0847
Cal202470W	orf19.2006	0.513985	0.995408	6402.51	0.0641449	1.00374	1573.23	1.0835	1.92121
Cal402960W	orf19.4656	0.641775	1.00143	7723.58	0.0783133	0.987607	1779.83	1.0835	1.56766
Cal122760C	orf19.4863	0.845943	1.00317	10241.2	0.140504	1.01339	2572.62	1.083	1.27421
Cal126200C	orf19.664	0.946503	1.00904	12048	0.126922	1.01328	2410.39	1.0825	0.330219
Cal403500W	snR72	0.947623	1.00882	12073.9	0.127451	1.01248	2416.54	1.0825	0.187383
Cal126190W	orf19.664	0.918211	1.00642	11447	0.1263	1.01558	2402.7	1.082	0.816001
Cal101590W	orf19.6032	0.946326	1.009	12044	0.1275	1.01231	2417.22	1.0815	0.325976
Cal207540W	orf19.893	0.93081	1.00758	11701.6	0.122495	1.01716	2356.41	1.0815	0.689429
Cal502220W	tQ(CUG)1	0.920801	1.00637	11497.1	0.0677964	1.0055	1627.32	1.0815	0.915703
Cal400420C	orf19.5645	0.920372	1.0065	11489.1	0.0573306	0.97388	1469.93	1.081	0.933381
Cal130650W	orf19.4964	0.946632	1.00895	12051.3	0.128251	1.01328	2426.58	1.081	0.124451
Cal409560W	orf19.1426	0.944469	1.0088	12001	0.125693	1.01748	2395.31	1.081	0.425678
Cal609940W	orf19.2125	0.859204	1.00297	10440.2	0.0638213	1.00409	1568.34	1.081	1.27986
CalR08430W	orf19.4372	0.756092	1.00337	9034.22	0.062109	0.999956	1542.81	1.08	1.64332
Cal201500W	orf19.2054	0.503615	0.995822	6298.84	0.0635845	1.00255	1564.61	1.0795	1.94384
Cal221280W	orf19.1405	0.804649	1.00072	9660.02	0.104678	1.00917	2131.69	1.0795	1.02318
Cal124820W	orf19.2343.1:orf19.2343	0.936812	1.00895	11828.6	0.134162	1.01781	2497.09	1.0785	0.10253
Cal301850C	orf19.6155	0.893975	1.00627	11006.1	0.118294	1.01665	2303.76	1.0775	0.577706
Cal124660C	orf19.1840	0.896999	1.006	11058.4	0.130609	1.01639	2455.14	1.077	0.98005
Cal128620W	orf19.68.2	0.394489	0.995323	5217.75	0.0505618	0.955202	1360.58	1.077	2.24436
Cal708180W	orf19.5505	0.837741	1.00272	10122.1	0.0478199	0.955738	1315.6	1.077	1.36472
Cal113680C	orf19.2436	0.939102	1.00842	11878.4	0.123682	1.01711	2370.66	1.0765	0.556493
Cal306240W	orf19.259	0.946235	1.0092	12041.6	0.128995	1.01473	2435.4	1.076	0.285671
Cal500350W	orf19.5680	0.934968	1.00891	11789.5	0.0665797	0.999731	1609.11	1.076	0.786303
Cal509570C	orf19.3912	0.944856	1.00899	12010.1	0.127434	1.0129	2416.35	1.076	0.38608
Cal103050W	orf19.3329	0.941748	1.0082	11937.6	0.124252	1.01661	2377.64	1.0755	0.0728319
Cal130100W	orf19.4941	0.945692	1.00906	12028.9	0.13042	1.01766	2452.8	1.0755	0.137886
Cal312330W	orf19.6975,orf19.6976	0.94367	1.00876	11982.8	0.129364	1.01653	2439.7	1.0755	0.0190918
Cal507320C	orf19.2646	0.945714	1.00901	12029.5	0.130426	1.01715	2452.88	1.0755	0.140714
CalR08280C	orf19.4367	0.946955	1.009	12058.7	0.0686977	1.00447	1640.39	1.0755	0.659731
Cal103850C	orf19.4548	0.823527	1.00276	9920.12	0.109685	1.01426	2196.79	1.075	0.931967
Cal124840C	orf19.2342	0.942444	1.00842	11953.4	0.129449	1.01555	2440.75	1.0745	0.0120208
Cal206460W	orf19.5813	0.943807	1.00846	11985.5	0.129686	1.01631	2443.77	1.0735	0.0304056
Cal502860C	orf19.1940	0.945376	1.00895	12022	0.131027	1.01583	2460.29	1.0735	0.1393
CalR04560W	orf19.2608	0.945854	1.00909	12032.5	0.130651	1.01617	2455.58	1.073	0.24183
Cal121910C	orf19.4823	0.808217	1.00043	9709.12	0.148351	1.01636	2665.26	1.0725	1.40644
CalR23750W	orf19.7660:orf19.7661	0.941099	1.00817	11923	0.124946	1.01826	2386.43	1.0725	0.0770746
Cal106440C	orf19.2974,orf19.2975	0.875723	1.00477	10700.4	0.135625	1.02035	2514.75	1.072	1.10167
Cal115190W	orf19.6238	0.945649	1.00909	12027.8	0.130464	1.01636	2453.4	1.0715	0.270822
Cal203440W	orf19.1470	0.933805	1.00803	11764.6	0.136772	1.01684	2528.5	1.0715	0.130815
Cal309430W	orf19.5857	0.94056	1.00864	11910.5	0.125599	1.01729	2394.13	1.071	0.079196
Cal113320W	orf19.2455	0.843573	1.00331	10206.8	0.1137	1.02076	2246.2	1.0705	0.839336
Cal131340C	orf19.5005	0.857293	1.00341	10410	0.13971	1.01372	2563.1	1.0705	1.1943
Cal510490W	orf19.3954.1	0.657355	1.00053	7896.04	0.0822588	1.00331	1835.5	1.0705	1.50684
Cal508890W	orf19.3210	0.938618	1.00857	11867	0.133669	1.0178	2491.05	1.0705	0.0615183
Cal102890C	orf19.3324	0.928112	1.00737	11644.7	0.128549	1.01397	2430.11	1.07	0.244659
Cal602460C	orf19.121	0.856636	1.00337	10400.3	0.115542	1.01837	2269.26	1.07	0.779232
Cal122830W	orf19.4865	0.913613	1.00664	11359.8	0.124493	1.01629	2380.69	1.0695	0.406586
Cal510480W	orf19.3954.1	0.905792	1.00582	11214.9	0.122345	1.01825	2354.41	1.0695	0.475883
Cal204980W	orf19.1544	0.851525	1.00387	10324.9	0.115331	1.02086	2266.69	1.0685	0.798324
Cal212170C	orf19.3572.3	0.597496	0.999045	7254.48	0.180743	1.02906	3030.42	1.0685	2.01596
Cal212310C	orf19.3577	0.943772	1.00857	11984.8	0.123757	1.01658	2371.47	1.0685	0.0247487
Cal414460W	orf19.2886	0.895861	1.00636	11038.5	0.0301125	0.895955	996.75	1.0685	1.10097
Cal502720W	orf19.1946	0.93705	1.00876	11833.8	0.128396	1.01387	2428.19	1.0685	0.119501
Cal127790C	orf19.5258:orf19.5257	0.354141	1.00519	4818.58	0.0444548	0.947279	1258.42	1.0685	2.36103
Cal126250C	orf19.8278	0.907885	1.00591	11253.8	0.1234	1.01768	2367.39	1.068	0.455377
Cal303390C	orf19.1701	0.944995	1.00884	12013.5	0.132525	1.01335	2477.45	1.068	0.209304
CalR05250W	orf19.3734	0.890109	1.00559	10938.6	0.0489814	0.955236	1335.11	1.0675	1.11369
Cal223050W	orf19.1759	0.839264	1.00255	10143.8	0.113834	1.02007	2248.04	1.067	0.855599
Cal120810W	orf19.4773	0.922984	1.00685	11541.5	0.12777	1.01169	2420.43	1.0665	0.738927
Cal605700C	orf19.5526	0.939045	1.00843	11877.1	0.0690159	1.00507	1645.03	1.0665	0.729027
Cal106080C	orf19.2961	0.922942	1.00688	11540.4	0.128814	1.01496	2433.23	1.066	0.296985
Cal118680C	orf19.5102	0.883379	1.00512	10825.5	0.136309	1.01915	2522.62	1.066	1.0451
Cal212540W	orf19.6872,snR56	0.926263	1.00709	11606.9	0.128858	1.01476	2433.77	1.066	0.264458
Cal312640W	tV(AAC)6:SNRNAU6	0.83399	1.00261	10069.7	0.114495	1.02031	2256.44	1.0655	0.871863
Cal308800C	orf19.6934	0.931919	1.00795	11724.6	0.130468	1.01584	2453.43	1.065	0.183848
Cal605690W	orf19.5525	0.94542	1.00892	12023.1	0.0704507	0.997879	1665.85	1.065	0.659024
Cal115350W	orf19.6231:orf19.6230	0.902613	1.00576	11157.5	0.123923	1.01678	2373.6	1.0645	0.487197
Cal209290C	orf19.808	0.863111	1.00357	10500.1	0.118046	1.01633	2300.73	1.064	0.72832
Cal603210W	orf19.3437	0.869216	1.00374	10596	0.120266	1.02089	2327.82	1.0635	0.6965
Cal306120W	orf19.252	0.917691	1.00638	11437.2	0.127168	1.01412	2413.21	1.063	0.353553
Cal414660C	orf19.2877	0.939893	1.00867	11896.2	0.0700338	1.00177	1659.56	1.063	0.711349
CalR02060W	orf19.3264.1	0.788768	1.00142	9448.51	0.105528	1.01064	2142.17	1.0625	1.06278
CalR09620W	orf19.515	0.737636	1.00069	8811.73	0.0761912	0.993708	1749.67	1.062	1.66594
Cal105230C	orf19.3694	0.940652	1.00859	11913	0.127375	1.01354	2415.58	1.0605	0.0516188
Cal406660W	orf19.2693	0.929306	1.00761	11670.3	0.13179	1.01307	2469.1	1.0605	0.204354
CalR19910W	orf19.7285	0.930642	1.00755	11698	0.132203	1.01356	2474	1.0605	0.185969
CalR09180C	orf19.489	0.85549	1.00324	10382.8	0.0649151	1.00386	1584.42	1.06	1.26855
CalR06750W	orf19.2862	0.941881	1.00826	11940.5	0.134807	1.01737	2504.58	1.06	0.0565686
Cal115540C	orf19.6222.1	0.851127	1.00406	10318.9	0.14226	1.01394	2593.13	1.0595	1.20845
Cal202460C	orf19.2006	0.9088	1.00546	11270.1	0.127236	1.01355	2413.99	1.0595	0.426385
Cal401810W	orf19.4711	0.940785	1.00836	11915.9	0.0710076	0.997963	1674.34	1.0595	0.697914
Cal410950W	orf19.3794	0.843973	1.00305	10213.3	0.0280807	0.888406	958.167	1.0595	1.32724
Cal112470W	orf19.412	0.943088	1.00851	11968.8	0.136182	1.01925	2521.03	1.059	0.179605
Cal113980C	orf19.1828	0.434445	0.997166	5612.75	0.0579344	0.977264	1479.06	1.059	2.10435
Cal212990W	orf19.6889	0.971861	1.00854	12732.2	0.0757764	1	1743.55	1.059	NaN
CalR15480C	orf19.1842	0.92892	1.00756	11662	0.132454	1.01334	2476.54	1.059	0.205061
Cal314710W	orf19.7400	0.938695	1.0085	11869.2	0.134516	1.01835	2501.27	1.058	0.0353553
CalR01170C	orf19.7488:orf19.7487	0.942723	1.00835	11960.1	0.136322	1.01872	2522.84	1.058	0.14425
Cal408820C	orf19.789.1	0.876973	1.00453	10721.2	0.0291553	0.895042	979.079	1.0575	1.18299
Cal129180W	orf19.6348	0.903234	1.00583	11168.9	0.126287	1.01605	2402.55	1.057	0.468105
CalR05750C	orf19.164	0.897023	1.00595	11058.9	0.124611	1.01667	2382.37	1.057	0.517602
Cal316650W	orf19.6789	0.876191	1.00443	10707.9	0.123089	1.01685	2363.49	1.0565	0.64276
Cal116820C	orf19.4427	0.780874	1.00078	9345.82	0.151562	1.02146	2701.13	1.056	1.47502
Cal132320W	orf19.7217	0.938213	1.00881	11858.2	0.136233	1.01911	2521.62	1.056	0.0268701
Cal309510W	orf19.5860	0.929295	1.00782	11670	0.0694189	1.00488	1651.24	1.056	0.804688
CalR13680W	orf19.3865	0.821464	1.00228	9891.07	0.116043	1.01845	2275.5	1.056	0.909339
Cal115370W	orf19.6229	0.821288	1.00214	9888.62	0.116193	1.0173	2277.59	1.0555	0.910046
Cal220460W	orf19.198	0.896966	1.00612	11058	0.125272	1.01805	2390.51	1.0555	0.514067
Cal608790W	orf19.5768	0.936926	1.00885	11831.1	0.136587	1.01651	2526.16	1.0555	0.0487904
CalR14480W	orf19.716,orf19.715	0.230097	1.00486	3562.66	0.0338668	0.908759	1069.22	1.0555	2.82065
Cal609280C	orf19.77.1	0.717236	1.00152	8571.29	0.378193	1.00588	5057.11	1.055	NaN
Cal205690C	orf19.1586,orf19.5797	0.93218	1.00801	11730	0.140821	1.01366	2576.29	1.0545	0.109602
Cal305160W	orf19.1623	0.876082	1.00439	10706.3	0.138425	1.01251	2548.11	1.0545	1.06844
Cal402790W	orf19.4665:orf19.4664	0.941356	1.00822	11928.6	0.137015	1.01656	2531.53	1.0545	0.0841457
CalR18090W	orf19.596.2	0.875901	1.00458	10703.3	0.139322	1.01141	2558.36	1.0545	1.06844
Cal108260C	tT(CGU)1	0.927592	1.00741	11634.2	0.127855	1.01181	2421.48	1.054	0.671751
Cal123020W	orf19.4873	0.824738	1.00298	9937.9	0.116291	1.01571	2278.91	1.054	0.893783
Cal704740W	snR8c	0.940711	1.00858	11914.3	0.137352	1.01491	2535.68	1.054	0.0636396
Cal108440W	orf19.1033	0.941192	1.0082	11925.1	0.137779	1.01341	2540.73	1.0535	0.0940452
Cal118600C	orf19.5097:orf19.5098	0.935008	1.00888	11790.6	0.131181	1.01377	2462.31	1.0535	0.119501
CalR10260C	orf19.550	0.937183	1.00867	11836.6	0.132219	1.01315	2474.16	1.053	0.509117
CalR21770W	orf19.7546	0.883213	1.00516	10822.5	0.124858	1.01811	2385.38	1.053	0.595384
Cal220700W	orf19.4079	0.938499	1.00859	11864.4	0.137182	1.01624	2533.57	1.0525	0.00494973
Cal510580C	orf19.3960	0.941034	1.00825	11921.3	0.137733	1.0141	2540.3	1.0525	0.0869741
Cal121080C	orf19.4783,orf19.4784	0.940267	1.00855	11903.8	0.135175	1.01802	2509.47	1.052	0.403051
Cal105670C	tR(UCU)4,tR(UCU)2,tR(UCU)3,tR(UCU)1,tR(UCU)5,tF(GAA)2,tF(GAA)3,tF(GAA)1,tF(GAA)5	0.938596	1.00862	11866.6	0.134467	1.01852	2500.78	1.0515	0.45467
CalR10500W	tS(GCU)2	0.937997	1.0088	11853.5	0.0720656	0.999263	1689.81	1.0515	0.710642
Cal214690W	orf19.33	0.824474	1.00291	9934.35	0.117066	1.01635	2288.84	1.0515	0.890247
Cal105090W	orf19.3687	0.630102	1.00189	7598.46	0.0828088	1.00578	1842.63	1.051	1.55281
Cal109320C	orf19.1049	0.916705	1.00644	11418.1	0.131556	1.01235	2466.51	1.051	0.33234
Cal203900W	orf19.1490.1	0.922656	1.0068	11534.4	0.130374	1.01784	2452.32	1.051	0.712764
Cal604720C	orf19.3494	0.902861	1.0058	11161.8	0.0337412	0.910447	1066.62	1.051	1.02955
CalR06170C	orf19.2832	0.940712	1.0085	11914.3	0.13862	1.0124	2550.09	1.051	0.0919239
Cal208950W	orf19.827	0.93801	1.00874	11853.7	0.13774	1.01364	2540.38	1.0505	0.0091924
Cal504980W	orf19.4234	0.938319	1.00847	11860.6	0.0725493	0.996436	1696.5	1.0505	0.7064
Cal312300W	orf19.6973	0.940751	1.00847	11915.2	0.0730269	0.996384	1703.16	1.05	0.681651
Cal505730W	orf19.4275	0.847453	1.00356	10263.8	0.120444	1.01822	2330.41	1.05	0.784888
Cal702720C	orf19.6908:orf19.6909	0.941445	1.00817	11930.5	0.137072	1.01647	2532.17	1.05	0.321026
Cal311510W	orf19.5975	0.935297	1.00874	11796.4	0.133814	1.01836	2492.94	1.0495	0.522552
Cal219680C	orf19.3599	0.896255	1.0061	11045.8	0.138836	1.01143	2552.66	1.049	0.927724
Cal104250C	orf19.4529	0.586915	0.998052	7144.44	0.182393	1.02836	3048.68	1.049	2.01667
Cal203550W	orf19.1476	0.914504	1.0067	11376.5	0.131942	1.0137	2470.94	1.0485	0.347189
Cal306310W	orf19.263.1	0.888385	1.00576	10909.7	0.126316	1.01515	2402.86	1.0485	0.559321
Cal121370W	orf19.4798	0.910482	1.00578	11301.3	0.131286	1.01404	2463.39	1.048	0.38608
Cal603550W	orf19.3426	0.938696	1.00843	11869.2	0.13909	1.01074	2555.83	1.048	0.0282842
CalR15990W	orf19.9	0.930395	1.00758	11692.6	0.0698709	1.00141	1657.42	1.048	0.784888
Cal310540C	orf19.5921	0.916666	1.00655	11417.4	0.134038	1.0174	2495.51	1.047	0.321026
Cal400370W	orf19.5642	0.941206	1.00814	11925.3	0.139135	1.01056	2556.27	1.047	0.272943
Cal207670W	orf19.882	0.842604	1.00307	10192.1	0.144892	1.01719	2624.98	1.0465	1.23249
CalR00650W	orf19.7509.2	0.876852	1.00455	10719.1	0.125696	1.01694	2395.39	1.0465	0.621547
CalR04620W	orf19.2609	0.937908	1.00893	11851.5	0.130319	1.01851	2451.48	1.046	0.0622254
Cal603090W	orf19.3441	0.938898	1.00842	11873.5	0.139812	1.01345	2564.56	1.0455	0.0459619
Cal703870C	orf19.6540	0.914912	1.00676	11384.5	0.133824	1.01791	2493.1	1.0455	0.334461
Cal510910W	orf19.3978	0.863304	1.00363	10503.1	0.125363	1.01708	2391.5	1.045	0.692965
Cal608800C	orf19.5770	0.566145	0.997864	6932.06	0.0758571	0.997432	1744.83	1.045	1.72393
Cal202240C	tL(CAA)2	0.929784	1.00775	11680.4	0.130374	1.01784	2452.3	1.0445	0.620133
CalR06990W	orf19.2417	0.859047	1.00319	10437.7	0.0526039	0.95878	1394.37	1.0445	1.23814
Cal302890W	orf19.1723	0.917014	1.00648	11424.2	0.133222	1.01545	2485.92	1.044	0.753776
Cal132890C	orf19.7251	0.894654	1.00656	11017.7	0.139827	1.01304	2564.77	1.044	0.931967
Cal132040C	orf19.5035	0.888869	1.00568	10917.9	0.142199	1.01451	2592.49	1.0435	0.966615
Cal215980W	orf19.2268	0.940267	1.00855	11903.8	0.141665	1.0167	2586.18	1.0435	0.226981
Cal703330C	orf19.6573	0.916273	1.00681	11409.6	0.135142	1.01884	2509.1	1.0435	0.316077
Cal415020C	orf19.3138	0.839036	1.00277	10140.6	0.121041	1.01792	2337.99	1.0425	0.815294
Cal215500C	orf19.2244,orf19.2245	0.874061	1.00469	10674.6	0.126762	1.01424	2408.26	1.042	0.629325
CalR10120W	orf19.542.2	0.923555	1.00687	11552.6	0.147586	1.01834	2656.8	1.042	0.183848
CalR21490W	orf19.6600,tN(GUU)4	0.926561	1.00727	11613.4	0.138226	1.01412	2545.79	1.042	0.18809
Cal114890C	orf19.6252	0.929733	1.00784	11679.6	0.134003	1.0182	2495.14	1.0415	0.598919
CalR01350C	orf19.7479	0.916605	1.00664	11416.3	0.136004	1.02003	2519.1	1.0415	0.306177
Cal303130W	orf19.1714	0.940076	1.00849	11899.8	0.140048	1.01262	2567.5	1.041	0.309713
Cal311890W	orf19.5996.1	0.90675	1.00596	11232.9	0.132714	1.01318	2479.74	1.041	0.405879
Cal707710C	orf19.6684	0.940019	1.00865	11898.5	0.141731	1.01617	2586.89	1.041	0.254558
CalR02940W	orf19.3226	0.680562	1.00004	8151.3	0.0931532	1.01412	1982.31	1.0405	1.38946
Cal402400W	orf19.4681	0.943375	1.0086	11975.6	0.075784	0.99919	1743.7	1.0405	0.631446
CalR19280C	orf19.6434	0.932304	1.00761	11733.2	0.136114	1.01927	2520.21	1.04	0.548715
Cal132240W	orf19.7215	0.939154	1.0084	11879.4	0.140464	1.01361	2572.11	1.039	0.343654
Cal214300W	snR50	0.482954	0.998288	6091.89	0.0678716	1.00558	1628.33	1.039	1.94454
Cal218300W	orf19.2168.3,orf19.2168	0.939954	1.00866	11897.3	0.141753	1.01532	2587.21	1.039	0.260215
Cal307880W	orf19.339	0.930162	1.0077	11687.9	0.137213	1.01543	2533.92	1.0375	0.567807
CalR10940W	orf19.6307	0.667891	1.0007	8011.53	0.0161718	0.833915	694.447	1.0375	1.85191
Cal304510W	tY(GUA)2,orf19.1655	0.731489	1.00239	8738.6	0.161924	1.03179	2819.77	1.037	1.60655
Cal100500W	orf19.6081	0.869238	1.00369	10596.4	0.143746	1.01554	2611.36	1.0365	1.07692
Cal216230W	orf19.2280	0.938291	1.00859	11859.8	0.143489	1.01571	2608.17	1.0365	0.101116
Cal217550C	orf19.2198	0.933483	1.00806	11757.4	0.138796	1.01165	2552.23	1.0365	0.504167
Cal506380W	orf19.4315,orf19.4316	0.825642	1.00273	9950.36	0.121346	1.01754	2341.98	1.0365	0.860549
Cal220740W	tP(UGG)2	0.861353	1.00354	10472.7	0.12761	1.01208	2418.59	1.036	0.687308
Cal312320W	orf19.6975	0.544334	0.99601	6708.09	0.0759054	0.995357	1745.56	1.036	1.76777
Cal132000W	orf19.5032	0.922852	1.00686	11538.3	0.133193	1.01577	2485.48	1.0355	0.678115
Cal302810W	orf19.1727	0.935268	1.00879	11795.8	0.143801	1.01543	2611.97	1.035	0.00848526
Cal601960W	orf19.93	0.731267	1.00237	8735.88	0.101414	1.00306	2089.92	1.035	1.22471
Cal118090W	orf19.5068	0.90795	1.0059	11255	0.135199	1.01768	2509.75	1.0345	0.379716
Cal217150C	orf19.1860.1	0.937101	1.00866	11835	0.144287	1.01689	2617.39	1.0345	0.0700036
Cal502400W	orf19.1963	0.90511	1.00568	11202.4	0.134619	1.01807	2502.5	1.0345	0.406586
Cal700890W	orf19.7079	0.802247	1.00013	9628.09	0.118494	1.01536	2306.4	1.0345	0.95813
Cal124970C	orf19.2333	0.913571	1.00666	11358.9	0.135976	1.02035	2518.81	1.0335	0.767211
Cal409370C	orf19.5293	0.988979	1.00677	13402.6	0.00297516	0.495517	268.84	1.033	NaN
Cal705440W	orf19.6460	0.884098	1.00499	10837.5	0.130906	1.01543	2458.73	1.033	0.555786
CalR13270W	orf19.459:orf19.458.1	0.00982126	0.930131	522.871	0.419353	1.01139	5464.8	1.033	NaN
Cal121050C	orf19.4783	0.899776	1.00577	11108.5	0.139043	1.01091	2555.13	1.0325	0.876105
CalR21480C	orf19.6600	0.937574	1.00872	11844.2	0.145693	1.01788	2634.17	1.0325	0.127986
CalR21280C	orf19.6608	0.923586	1.00675	11553.1	0.141506	1.01657	2584.28	1.032	0.193747
Cal212110W	orf19.3569	0.938135	1.0088	11856.3	0.144679	1.01668	2622.48	1.0315	0.279307
CalR12970C	orf19.6630	0.878019	1.0043	10738.3	0.0329821	0.90685	1052.3	1.0315	1.13773
CalR16450W	orf19.6138	0.937932	1.00881	11852	0.145855	1.01754	2636.14	1.0315	0.242538
Cal113770W	orf19.2433	0.937027	1.00881	11833.3	0.146434	1.01718	2642.82	1.031	0.120208
Cal412030C	orf19.1791	0.934878	1.00889	11787.7	0.145418	1.01841	2630.85	1.0305	0.0233345
Cal114060C	orf19.1825,orf19.2657	0.906922	1.00599	11236.1	0.136558	1.01682	2525.91	1.0305	0.378302
Cal700670W	orf19.7091	0.907394	1.00606	11244.4	0.0633658	1.00456	1561.27	1.0305	0.945402
Cal119260W	orf19.391,orf19.392	0.909757	1.00552	11288.1	0.138932	1.01111	2553.81	1.03	0.347897
Cal129330W	orf19.6341	0.674888	1.00104	8088.56	0.0944534	1.00635	1999.37	1.03	1.39159
Cal132930C	orf19.7254	0.712246	1.00228	8513.36	0.165415	1.02518	2860.2	1.03	1.65604
Cal313280W	orf19.7356,orf19.7357	0.935344	1.00857	11797.2	0.145984	1.01795	2637.73	1.0295	0.0431335
Cal317460C	orf19.6740	0.875096	1.00461	10691.1	0.0647557	1.00461	1581.94	1.0295	1.12218
Cal602490W	orf19.122	0.920244	1.00644	11486.5	0.141776	1.01499	2587.42	1.029	0.233345
CalR01800W	orf19.3281	0.939035	1.0085	11876.9	0.0767868	0.995206	1758.32	1.029	0.659023
Cal207740W	orf19.878	0.866167	1.0027	10547.4	0.145521	1.01865	2632.07	1.0285	1.08258
Cal217590W	orf19.2197	0.93753	1.00875	11843.4	0.146773	1.01612	2647.07	1.0285	0.221324
Cal221600W	orf19.1394,orf19.1393	0.931696	1.00778	11720.2	0.136791	1.01646	2528.72	1.0285	0.106773
Cal702730W	orf19.6909	0.510424	0.995163	6366.76	0.0727598	0.995552	1699.4	1.027	1.84979
Cal119720W	orf19.4724:orf19.4725	0.932175	1.00808	11729.9	0.142216	1.01413	2592.66	1.027	0.492146
Cal133030C	orf19.7261	0.937221	1.00857	11837.5	0.14502	1.0176	2626.26	1.027	0.319612
Cal217050W	orf19.1865	0.624507	1.00156	7538.48	0.088305	1.0139	1917.2	1.027	1.53159
Cal213970C	orf19.5487	0.729158	1.0027	8709.91	0.162673	1.02707	2828.64	1.0265	1.59735
Cal121330W	orf19.4795,orf19.4796	0.856398	1.00349	10396.8	0.145798	1.01763	2635.43	1.026	1.12713
Cal503090W	orf19.1927	0.936874	1.00887	11830	0.14796	1.0185	2660.95	1.026	0.210718
Cal400760W	orf19.5664	0.92994	1.00777	11683.4	0.146357	1.01811	2642.06	1.0255	0.0714178
Cal131350W	orf19.5005	0.603531	0.997509	7317.39	0.180797	1.02735	3031.04	1.025	1.9403
Cal125380C	orf19.2312	0.885285	1.00484	10857.5	0.133848	1.01756	2493.34	1.025	0.533158
Cal213830C	orf19.5479	0.645385	1.00167	7762.75	0.175762	1.02901	2974.27	1.025	1.83424
Cal221140W	orf19.1598	0.826402	1.00273	9960.81	0.150464	1.01975	2688.64	1.025	1.26572
Cal402980W	orf19.4655	0.93501	1.00881	11790.6	0.144658	1.01703	2622.19	1.025	0.403051
Cal511030W	orf19.3984	0.889271	1.0055	10924.5	0.134527	1.01791	2501.45	1.025	0.509117
Cal708510W	orf19.7194	0.983561	1.00784	13156.4	0.0331014	0.908409	1054.71	1.025	NaN
Cal302960C	orf19.1719	0.917263	1.00637	11429.1	0.136549	1.01727	2525.78	1.0235	0.712056
Cal609080W	orf19.1212	0.896683	1.00611	11053.3	0.137959	1.01319	2542.67	1.0235	0.44477
CalR10170W	orf19.544:orf19.544.1	0.936247	1.00887	11816.8	0.149095	1.01761	2673.16	1.0235	0.226981
CalR14690C	orf19.695	0.660868	1.00136	7933.11	0.093911	1.00947	1992.56	1.0235	1.42341
Cal118940W	orf19.5114	0.907083	1.00579	11239	0.140021	1.01293	2567.13	1.023	0.797616
Cal211440W	orf19.3536	0.93001	1.00777	11684.7	0.143145	1.01526	2603.85	1.023	0.519016
Cal311620C	orf19.5980	0.929295	1.00782	11670	0.143206	1.01519	2604.51	1.022	0.528916
Cal112630W	orf19.2494	0.935342	1.00864	11797.2	0.149329	1.01872	2675.84	1.022	0.113137
Cal217110W	orf19.1862,orf19.1861	0.903081	1.00581	11165.9	0.138365	1.01258	2547.4	1.022	0.397394
Cal413870C	orf19.2917	0.89903	1.00571	11095.2	0.138725	1.01164	2551.38	1.022	0.42285
Cal125750W	orf19.2296	0.928502	1.00749	11653.5	0.147251	1.01845	2652.87	1.021	0.0848528
Cal409950W	orf19.3846,orf19.3845	0.865803	1.00308	10541.9	0.132376	1.01381	2475.71	1.021	0.639225
Cal510300W	orf19.3945	0.931525	1.00767	11716.5	0.144587	1.01702	2621.33	1.021	0.478004
Cal705380C	orf19.6463	0.840271	1.00284	10158.2	0.068441	1.00376	1636.73	1.021	1.26572
CalR03050W	orf19.3222	0.568554	0.9975	6956.21	0.459287	1.0111	5856.93	1.021	NaN
Cal303940W	orf19.1674	0.935999	1.00875	11811.3	0.149346	1.01789	2676.08	1.021	0.164049
Cal609150C	orf19.4557	0.921867	1.00692	11518.8	0.0753492	1.00074	1737.17	1.0205	0.805395
Cal411180C	orf19.3782.2	0.935359	1.00851	11797.4	0.146559	1.01658	2644.36	1.02	0.35921
CalR23150C	orf19.7617	0.651467	1.00072	7830.61	0.164714	1.0261	2852.46	1.0195	1.81656
Cal124990W	orf19.2333	0.924792	1.00686	11577.8	0.150331	1.0198	2687.19	1.019	0.123037
Cal105170C	tR(CCG)1	0.935204	1.00879	11794.4	0.151133	1.02189	2696.24	1.018	0.216375
Cal201350W	orf19.2062	0.708911	1.00138	8474.1	0.102244	1.00646	2100.67	1.018	1.27138
Cal511240W	orf19.3997	0.89874	1.00569	11089.8	0.0635887	1.00152	1564.68	1.018	0.978636
Cal208550W	orf19.843	0.935319	1.00869	11796.8	0.150602	1.02021	2690.29	1.0175	0.163342
Cal608780W	orf19.5767:orf19.5768	0.929354	1.00758	11671.4	0.149613	1.01875	2679.24	1.0175	0.0445477
Cal133040W	orf19.7261	0.900924	1.00558	11128.2	0.140271	1.01272	2569.95	1.017	0.400222
Cal301940W	orf19.6163	0.934757	1.00884	11784.8	0.149536	1.0187	2678.36	1.017	0.321026
Cal413090C	orf19.1268	0.923758	1.00649	11556.5	0.142302	1.01324	2593.7	1.017	0.609526
Cal603410C	orf19.3431	0.93127	1.00755	11711.2	0.15017	1.01919	2685.39	1.017	0
Cal102510C	orf19.3304	0.926705	1.00712	11616.4	0.144765	1.0168	2623.57	1.0165	0.55225
Cal218390W	orf19.2165	0.552022	0.995619	6785.72	0.175783	1.02872	2974.48	1.0165	2.06122
CalR15090W	orf19.709	0.911033	1.00586	11311.1	0.144105	1.01659	2615.36	1.0165	0.301935
Cal115090W	orf19.6243	0.918972	1.00611	11461.8	0.141272	1.0159	2581.31	1.016	0.666095
Cal316110C	orf19.6813	0.984469	1.00777	13195.3	0.0270014	0.887188	936.375	1.016	NaN
Cal401310C	orf19.4183	0.919631	1.00607	11474.4	0.0635204	1.00263	1563.69	1.016	0.837214
Cal401970W	tG(GCC)5	0.512115	0.994844	6383.76	0.481825	1.01315	6080.31	1.015	NaN
Cal112790W	orf19.2480.1	0.932505	1.00768	11737.4	0.151944	1.02166	2705.42	1.014	0.0565686
Cal606700C	orf19.5584	0.552167	0.995384	6787.11	0.0803658	0.997003	1809.11	1.014	1.71686
Cal605720W	orf19.5527	0.902276	1.00608	11151.4	0.0659192	1.00123	1599.04	1.013	0.950352
Cal702880W	orf19.6918	0.930137	1.00775	11687.3	0.151703	1.02193	2702.82	1.013	0.00565687
Cal316010W	orf19.6817	0.606138	0.998629	7345.08	0.0878302	1.01165	1910.99	1.0125	1.562
Cal410160C	orf19.3836	0.885166	1.00494	10855.6	0.0364479	0.920087	1117.59	1.0125	1.07127
Cal123320C	orf19.4886	0.631302	1.00181	7611.46	0.0917315	1.01079	1963.15	1.0125	1.49129
Cal305650W	orf19.229	0.749812	1.00303	8958.89	0.113328	1.01932	2241.53	1.012	1.12571
CalR00770W	orf19.7504	0.840615	1.00309	10163	0.132531	1.01285	2477.57	1.012	0.752362
Cal202230W	orf19.2017	0.591229	0.998706	7189.43	0.182731	1.02786	3052.25	1.011	1.95161
Cal601610W	orf19.3644	0.927838	1.0073	11639	0.147629	1.01816	2657.29	1.011	0.511945
Cal609490W	orf19.1080	0.792902	0.999317	9502.92	0.123422	1.01728	2367.62	1.011	0.958837
Cal501460W	orf19.922	0.780705	1.00092	9343.5	0.121346	1.01812	2341.95	1.0105	1.00763
Cal303580W	orf19.1690	0.931158	1.00773	11708.6	0.14893	1.01744	2671.44	1.0105	0.437699
Cal316620W	orf19.6790	0.91811	1.00654	11445	0.143018	1.01535	2602.3	1.0105	0.662559
Cal303090W	orf19.1715	0.356073	1.00497	4837.82	0.20523	1.03472	3299.14	1.01	2.53993
Cal312120W	orf19.6008	0.927825	1.00736	11638.8	0.148039	1.01759	2661.82	1.01	0.509117
Cal116620W	orf19.4437	0.776568	1.00022	9290.75	0.160549	1.03118	2804.24	1.0095	1.41916
Cal200500C	orf19.2108:orf19.2107.1	0.932524	1.00755	11737.8	0.153962	1.02618	2728.56	1.0095	0.0982878
Cal211930C	orf19.3559,CD39	0.894689	1.00652	11018.3	0.14196	1.0153	2589.65	1.0095	0.432042
Cal504770W	orf19.4225	0.822852	1.00287	9910.41	0.0309344	0.901891	1012.47	1.0095	1.33572
CalR02760W	orf19.3233	0.896066	1.00612	11042.5	0.142409	1.01252	2595.01	1.009	0.420021
CalR21540W	orf19.6598	0.750588	1.00286	8968.21	0.115014	1.02055	2262.55	1.009	1.11723
Cal409380W	orf19.5293	0.927809	1.00749	11638.5	0.153693	1.0258	2725.35	1.0085	0.0318198
Cal709350W	orf19.7136	0.933247	1.00796	11752.7	0.154672	1.02666	2736.8	1.008	0.231931
Cal315630C	orf19.7458	0.93119	1.00769	11709.4	0.15044	1.02006	2688.41	1.0075	0.419314
Cal510160W	orf19.3939	0.930029	1.00771	11685	0.154329	1.02626	2732.78	1.0075	0.0247487
Cal215340W	orf19.2236:orf19.2237	0.922313	1.00673	11527.6	0.146482	1.01702	2643.31	1.007	0.595384
Cal604810W	orf19.3458	0.801558	1.00014	9618.94	0.126178	1.01686	2401.34	1.007	0.914996
Cal106330W	orf19.2971	0.931304	1.00751	11711.9	0.156005	1.02657	2752.59	1.005	0.0947523
Cal220510W	orf19.4067	0.969138	1.00882	12646.8	0.0804693	0.996581	1810.89	1.005	NaN
Cal311020C	tK(CUU)2	0.928584	1.00743	11655.1	0.151242	1.02168	2697.46	1.005	0.462448
Cal510230C	orf19.3942	0.921686	1.00695	11515	0.0793078	0.991519	1794.15	1.005	0.777817
CalR02920W	orf19.3227	0.155473	1.00125	2746.21	0.03006	0.896235	995.855	1.005	3.13248
CalR09120W	orf19.485:orf19.486	0.932264	1.00772	11732	0.156553	1.02691	2758.9	1.005	0.19799
Cal108540W	orf19.1029	0.930767	1.00761	11700.6	0.151803	1.02166	2703.83	1.0045	0.409415
Cal604930W	orf19.3462	0.932767	1.00759	11742.9	0.155162	1.02662	2742.22	1.004	0.260215
Cal121600W	orf19.4808:orf19.4809	0.615669	0.999668	7444.85	0.16947	1.02832	2906.19	1.0035	1.87878
Cal129260C	orf19.6343	0.930582	1.00763	11696.7	0.151716	1.02155	2702.95	1.0035	0.415072
Cal508690C	orf19.3218	0.929763	1.0078	11680.1	0.0804865	0.995944	1811.19	1.0035	0.704985
Cal709340C	orf19.7136	0.932233	1.00784	11731.2	0.154016	1.02559	2729.3	1.0035	0.325976
Cal110560W	orf19.778	0.89505	1.00623	11024.6	0.144429	1.01739	2619.18	1.003	0.414365
Cal302670C	orf19.3158	0.925491	1.00701	11591.3	0.154215	1.02598	2731.49	1.0025	0.0685894
Cal218000W	orf19.2178.1	0.932214	1.00789	11730.8	0.155676	1.02627	2748.48	1.0025	0.28355
Cal222160C	orf19.1364	0.721367	1.00236	8619.08	0.109812	1.01285	2198.43	1.002	1.2035
Cal401200W	orf19.4188	0.925639	1.00702	11594.1	0.151283	1.021	2697.95	1.002	0.510531
Cal414440C	orf19.2886	0.913431	1.00666	11356.1	0.150812	1.02115	2692.65	1.002	0.234759
CalR13710C	orf19.3867	0.883633	1.00493	10829.6	0.142774	1.01411	2599.34	1.002	0.494975
CalR18650C	orf19.6396	0.92577	1.00701	11597.1	0.155198	1.02639	2742.67	1.002	0.0537401
CalR22060C	orf19.7561	0.901838	1.00582	11143.8	0.144506	1.01744	2620.3	1.002	0.803273
Cal105250W	orf19.3694	0.930338	1.00767	11691.6	0.157422	1.02565	2768.82	1.0015	0.0883883
Cal500130W	orf19.5694	0.877513	1.00404	10730.1	0.0785052	0.988306	1782.85	1.0015	1.05854
Cal512060C	orf19.4048	0.920943	1.00637	11500.1	0.14841	1.01629	2665.96	1.0015	0.596091
Cal111490W	orf19.4063	0.926729	1.00707	11616.9	0.156466	1.02727	2757.93	1.001	0.019799
Cal216530W	orf19.1896	0.92299	1.00678	11541.6	0.149645	1.01849	2679.63	1.0005	0.564978
CalR03350C	orf19.2531	0.923559	1.0068	11552.7	0.155651	1.02658	2748.23	1.0005	0.0841457
Cal306970C	orf19.299	0.877035	1.00444	10722.4	0.141991	1.01452	2589.97	0.9995	0.531037
CalR23690W	orf19.7655	0.67106	1.0013	8046.71	0.172948	1.02706	2944.39	0.9995	1.73029
Cal208430W	orf19.848	0.915897	1.00678	11402.4	0.150045	1.01881	2684.01	0.999	0.205061
Cal413400C	orf19.4407	0.915254	1.00653	11391	0.146695	1.01655	2645.92	0.999	0.666095
Cal108670W	orf19.4459	0.874642	1.0048	10684.2	0.142112	1.01488	2591.39	0.999	0.544472
Cal129450W	orf19.4914.1	0.916373	1.00677	11411.8	0.148015	1.0184	2661.63	0.9985	0.647003
Cal500790C	orf19.952	0.885183	1.00488	10855.9	0.079726	0.99503	1800.18	0.9985	1.01328
Cal607570W	orf19.5627	0.927715	1.00746	11636.7	0.158014	1.02536	2775.52	0.9985	0.0190918
Cal705620W	orf19.6455:orf19.6453	0.914061	1.00659	11368	0.0787115	0.988328	1785.79	0.9985	0.832265
Cal209400C	orf19.802	0.730963	1.00252	8731.91	0.387554	1.00585	5149.09	0.998	NaN
Cal128500C	orf19.5221	0.733048	1.00282	8756.83	0.114086	1.02107	2251.12	0.998	1.15966
Cal706100W	orf19.5178,orf19.5177	0.910973	1.00594	11310	0.161807	1.03195	2818.55	0.9975	0.215668
Cal118800C	orf19.5106	0.924249	1.00649	11566.8	0.156876	1.02717	2762.47	0.997	0.0622254
CalR14440C	orf19.717	0.930885	1.00758	11703.3	0.157834	1.02557	2773.48	0.997	0.289914
Cal116330W	orf19.4447	0.677213	1.00049	8113.74	0.171972	1.02673	2933.91	0.9965	1.71049
Cal218980C	orf19.3631	0.898959	1.00571	11093.7	0.148532	1.01616	2667.12	0.9965	0.369817
Cal305810W	orf19.238	0.589202	0.998309	7168.27	0.0735162	0.99836	1710.61	0.9965	1.97636
Cal706460W	orf19.5161,orf19.5160	0.834399	1.00244	10075.1	0.136005	1.01951	2519.14	0.9965	0.755897
CalR06050W	orf19.2827	0.70669	1.00048	8448.41	0.108032	1.00992	2175.21	0.9965	1.24521
Cal512070W	orf19.4048	0.910574	1.00573	11303.1	0.0779731	0.991949	1775.31	0.9965	0.854892
Cal127460W	orf19.5274	0.918647	1.00629	11455.1	0.157453	1.02493	2769.25	0.996	0.138593
Cal201560W	orf19.2050,orf19.2049	0.808776	1.00061	9716.85	0.157328	1.02642	2767.58	0.996	1.28835
Cal312660C	orf19.6986	0.919395	1.0062	11470.1	0.0815141	0.998428	1825.17	0.996	0.78206
CalR15430C	orf19.1843	0.796932	0.999441	9556.65	0.0494645	0.955653	1343.16	0.996	1.39724
Cal705700W	orf19.2372	0.930636	1.00762	11697.9	0.159522	1.02869	2792.55	0.9955	0.221324
CalR08390W	orf19.4370,orf19.4371	0.909333	1.00544	11280	0.162538	1.02936	2826.91	0.995	0.227688
Cal310620C	orf19.5926	0.922633	1.00685	11533.9	0.0821801	1.00319	1834.45	0.9945	0.748826
Cal701500C	orf19.7046	0.9266	1.00723	11614.2	0.155478	1.02684	2746.27	0.9945	0.451841
Cal114770W	orf19.6259	0.851498	1.004	10324.6	0.138435	1.01207	2548.22	0.9945	0.671044
Cal412980W	orf19.1264	0.930484	1.0076	11694.6	0.157834	1.02557	2773.49	0.9945	0.31042
Cal501380W	orf19.927	0.239124	0.999971	3656.16	0.55801	1.00918	6848.34	0.994	NaN
CalR10040C	orf19.540	0.867985	1.0032	10576.2	0.0681504	1.00663	1632.62	0.994	1.10733
Cal118480W	orf19.5090	0.870484	1.00393	10616.8	0.143026	1.01491	2602.38	0.9935	0.559322
Cal118790W	orf19.2244,orf19.2245,orf19.7308	0.862314	1.00369	10487.7	0.141175	1.01571	2580.12	0.9935	0.60599
Cal401450C	orf19.4174	0.761184	1.00223	9097.43	0.122305	1.01909	2353.86	0.9935	1.05288
Cal305390C	orf19.1616	0.984776	1.00773	13209.1	0.0204217	0.865234	794.662	0.993	NaN
Cal208720W	orf19.837	0.734055	1.00249	8768.8	0.166671	1.02637	2874.45	0.9925	1.53513
Cal109260C	orf19.1045	0.638484	1.00137	7688.44	0.0986653	1.00822	2054.3	0.992	1.43967
Cal201000W	orf19.2077	0.783698	1.00095	9382.27	0.161206	1.02947	2811.8	0.992	1.37037
Cal211670W	orf19.3548.1	0.763202	1.00288	9121.99	0.164435	1.02612	2849.26	0.992	1.43684
Cal305620C	orf19.227	0.813671	1.00205	9782.88	0.131961	1.01331	2471.19	0.9915	0.837922
Cal701580W	orf19.7043	0.927587	1.00748	11634.1	0.156121	1.02594	2754.05	0.9915	0.426385
Cal403110W	orf19.4649	0.929818	1.00771	11681.2	0.158793	1.02765	2784.8	0.991	0.316784
Cal117610W	orf19.4712,orf19.1234,orf19.6896,orf19.5191	0.910889	1.00593	11308.6	0.148333	1.01672	2665.05	0.991	0.694379
Cal312340C	orf19.6976	0.927216	1.00745	11626.3	0.160823	1.03066	2807.28	0.9905	0.0473762
Cal403550C	snR75	0.883463	1.00498	10826.8	0.0691139	1.00548	1646.59	0.9905	1.02177
Cal110550W	orf19.779	0.877319	1.00421	10727.1	0.145695	1.01741	2634.22	0.9905	0.511238
Cal301560W	orf19.5384	0.825465	1.00276	9947.96	0.137006	1.01702	2531.36	0.9905	0.784181
Cal506430W	orf19.4317	0.919172	1.00618	11465.9	0.159095	1.02823	2787.91	0.9905	0.116673
Cal313620W	orf19.7368,orf19.7369	0.721593	1.00239	8621.75	0.114344	1.02149	2254.36	0.989	1.18228
CalR02770W	orf19.3232	0.918701	1.00612	11456.3	0.15003	1.01919	2683.8	0.989	0.165463
Cal501310C	orf19.930	0.926654	1.00722	11615.2	0.162672	1.02752	2828.61	0.9885	0.0615183
CalR08370W	orf19.4370	0.911093	1.00577	11312.2	0.0814424	0.998393	1824.19	0.9885	0.836507
Cal203420W	orf19.1468	0.92726	1.00735	11627.3	0.162555	1.02902	2827.14	0.988	0.079196
Cal413990W	orf19.2909	0.928839	1.00755	11660.3	0.162315	1.03155	2824.36	0.988	0.151321
Cal305960W	orf19.243	0.984293	1.00801	13187.3	0.0217329	0.867521	823.913	0.988	NaN
Cal705750W	orf19.3701	0.915934	1.00674	11403	0.153578	1.02598	2724.14	0.988	0.615183
Cal504390C	orf19.3173:orf19.3172	0.824828	1.00275	9939.14	0.0328599	0.906933	1050.11	0.987	1.29683
Cal101340W	orf19.6041	0.905811	1.00576	11215.4	0.155867	1.0266	2750.73	0.987	0.275772
Cal215810W	orf19.2259:orf19.2260	0.923867	1.00638	11558.7	0.161455	1.03061	2814.61	0.987	0.0226274
Cal101030W	orf19.6060	0.924605	1.00673	11574	0.162467	1.02981	2826.11	0.9865	0.00636396
CalR12030W	orf19.5288	0.916469	1.0068	11413.8	0.0833202	1.00693	1849.66	0.9865	0.78701
Cal128580W	orf19.69	0.928513	1.00743	11653.8	0.163084	1.02743	2833.59	0.986	0.164049
Cal221530W	orf19.1396	0.792286	0.999411	9494.6	0.160842	1.02942	2807.5	0.986	1.33077
Cal704430C	orf19.6514	0.925355	1.00701	11588.8	0.162415	1.03039	2825.44	0.986	0.0240417
Cal511250W	orf19.3997	0.923548	1.00694	11552.5	0.158076	1.0253	2776.2	0.9855	0.480126
Cal130850W	orf19.4975	0.869417	1.00381	10599.2	0.148717	1.01695	2669.15	0.985	0.995606
Cal309920W	orf19.5880	0.927473	1.00743	11631.8	0.163667	1.02664	2840.58	0.9845	0.116673
CalR11050W	orf19.1803	0.925486	1.00708	11591.3	0.0858268	1.0119	1883.45	0.9845	0.7064
Cal129230W	orf19.6345	0.89446	1.0065	11014.5	0.150026	1.01964	2683.75	0.984	0.825901
Cal407260C	orf19.2665	0.919715	1.00609	11476	0.151046	1.02226	2695.31	0.984	0.140007
Cal410380W	orf19.3822	0.724516	1.00231	8655.91	0.028107	0.887298	958.757	0.9835	1.61432
CalR01300W	orf19.7482	0.851799	1.00379	10329.1	0.14238	1.0133	2594.65	0.983	0.649124
Cal310480C	orf19.5919	0.417886	0.997064	5450	0.523968	1.01177	6503.47	0.983	NaN
CalR06390W	orf19.2842	0.981645	1.00773	13078.3	0.0343368	0.911245	1078.78	0.983	NaN
CalR04120W	orf19.2581:orf19.2582	0.240328	0.996381	3668.87	0.0858509	1.01137	1883.82	0.983	2.86378
Cal106950W	orf19.3003	0.921689	1.00688	11515.1	0.16292	1.02729	2831.49	0.9825	0.0445478
Cal118720W	orf19.5103	0.813589	1.00212	9781.77	0.137171	1.01668	2533.47	0.9825	0.822365
Cal100170C	orf19.6105	0.924997	1.007	11581.8	0.160315	1.03151	2801.63	0.982	0.428507
Cal120470C	orf19.4758	0.899604	1.00573	11105.2	0.155498	1.0265	2746.52	0.982	0.326683
Cal113950C	orf19.2662,orf19.2663	0.926673	1.00716	11615.6	0.16548	1.02514	2860.84	0.981	0.125865
Cal110540C	orf19.779	0.63407	1.0016	7641.1	0.10135	1.00449	2089	0.981	1.43543
Cal708460C	orf19.7196	0.920545	1.00639	11492.1	0.0844085	1.01165	1864.29	0.981	0.743876
Cal101000C	orf19.6061	0.652156	1.00061	7838.13	0.103349	1.01115	2114.75	0.9805	1.38522
Cal204040W	orf19.1497	0.886216	1.00534	10873	0.151298	1.02063	2698.11	0.9805	0.436285
Cal129160W	orf19.6348	0.909161	1.00555	11276.8	0.15393	1.02643	2728.11	0.98	0.678822
Cal404070W	orf19.4608	0.926226	1.00713	11606.1	0.160517	1.03144	2803.84	0.98	0.400222
Cal502850W	orf19.1941	0.81499	1.00188	9801.45	0.138293	1.01307	2546.58	0.98	0.811759
Cal606510W	orf19.5572	0.923668	1.00661	11554.7	0.0865659	1.01648	1893.48	0.98	0.714178
Cal606990W	orf19.5597.1	0.705106	1.00049	8429.39	0.0265894	0.889792	927.432	0.98	1.66594
Cal609560C	orf19.1083	0.922582	1.00687	11532.6	0.164192	1.02726	2846.6	0.98	0.0155564
Cal114560W	orf19.6266	0.887599	1.0055	10896	0.151898	1.02182	2704.87	0.9795	0.866206
CalR02680C	orf19.3235	0.822984	1.00286	9912.27	0.139901	1.01257	2565.74	0.9795	0.775696
Cal200770W	orf19.2092	0.902979	1.00586	11164	0.151186	1.02178	2696.89	0.979	0.742462
Cal607480W	orf19.5623	0.900981	1.00556	11129.3	0.157743	1.02543	2772.35	0.979	0.301227
Cal411680C	orf19.6858	0.899428	1.00561	11101.9	0.156849	1.02746	2762.13	0.9785	0.320319
Cal506990C	orf19.4349	0.902464	1.00575	11155	0.168247	1.02865	2891.7	0.9785	0.25668
Cal107850W	orf19.3051	0.892128	1.00567	10973.5	0.155998	1.02699	2752.51	0.9775	0.375474
Cal209040W	orf19.820	0.877961	1.00431	10737.5	0.153845	1.02634	2727.04	0.9775	0.922774
Cal305540W	orf19.1608	0.879456	1.00468	10761.4	0.151128	1.02233	2696.19	0.977	0.473762
CalR15640C	orf19.2366	0.899811	1.00573	11109.1	0.0808054	0.998184	1815.49	0.9765	0.895904
Cal301380W	orf19.5395	0.920669	1.00637	11494.4	0.161168	1.02968	2811.39	0.9765	0.497096
CalR10190C	orf19.547	0.77758	1.00046	9303.71	0.130447	1.01677	2453.17	0.9765	0.963787
Cal316330W	orf19.6803	0.813595	1.00204	9781.84	0.140078	1.01183	2567.83	0.975	0.80893
Cal500400W	orf19.979	0.705143	1.00044	8429.79	0.114368	1.02107	2254.72	0.975	1.21622
CalR23640W	orf19.7654	0.926208	1.00719	11605.7	0.164346	1.02645	2848.36	0.975	0.339411
Cal300530C	orf19.5443	0.908313	1.00592	11261.4	0.155509	1.0261	2746.62	0.9745	0.675287
Cal501970W	orf19.1980	0.926088	1.00721	11603.3	0.167793	1.02978	2886.87	0.9745	0.187383
Cal215960W	orf19.2267	0.884563	1.00504	10845.1	0.153186	1.0243	2719.67	0.9745	0.878934
Cal118470W	orf19.5089:orf19.5090	0.599331	0.998195	7273.32	0.0968661	1.00833	2030.9	0.974	1.52169
Cal205050W	orf19.1547:orf19.1548	0.883284	1.00517	10823.7	0.153186	1.0243	2719.67	0.9735	0.443356
CalR19440C	orf19.6445	0.395693	0.99628	5229.51	0.202798	1.03652	3272.94	0.9735	2.39214
Cal302740C	orf19.1729	0.925683	1.00699	11595.1	0.165972	1.02381	2866.22	0.973	0.326683
Cal103610W	orf19.3356	0.683025	0.999902	8179.16	0.17232	1.02669	2937.74	0.973	1.65887
Cal130640C	orf19.4964	0.921617	1.00695	11513.7	0.168022	1.02901	2889.36	0.9725	0.013435
Cal219150W	orf19.3625	0.922382	1.00673	11528.8	0.163718	1.02607	2841.19	0.972	0.43982
CalR23940W	orf19.7675	0.680582	0.999962	8151.47	0.17251	1.02698	2939.69	0.972	1.66453
Cal108010C	tL(UAA)3,tL(UAA)4,tL(UAA)1,tL(UAA)5,tL(UAA)2	0.920415	1.00648	11490	0.16403	1.0267	2844.8	0.9715	0.473054
Cal100710W	orf19.6073	0.803059	1.00054	9639	0.162337	1.03034	2824.64	0.971	1.26855
Cal202280W	orf19.2016	0.898373	1.00567	11083.3	0.160594	1.03102	2804.83	0.971	0.308299
Cal217920W	orf19.2181	0.89282	1.00583	10985.6	0.159509	1.02907	2792.45	0.9705	0.352846
Cal219420W	orf19.3612,orf19.3611	0.854699	1.00353	10370.6	0.14849	1.01635	2666.71	0.9705	0.604576
Cal100020W	orf19.6114	0.67805	0.999893	8123.2	0.0828937	1.00597	1843.85	0.97	1.70696
Cal318290C	orf19.6188	0.839067	1.00273	10140.9	0.0716535	0.999288	1683.81	0.97	1.19642
CalR19380W	orf19.6440:orf19.6442	0.435995	0.997564	5628	0.187415	1.03139	3103.8	0.97	2.28678
Cal605640W	orf19.5522	0.922216	1.00693	11525.7	0.170426	1.02852	2917	0.9695	0.0629325
CalR02250W	orf19.3260	0.909607	1.00551	11285.1	0.157524	1.02493	2770.04	0.9695	0.207182
CalR13330C	orf19.454	0.91869	1.00618	11455.9	0.163397	1.02761	2837.31	0.9695	0.505581
Cal132400C	orf19.7221	0.923467	1.00693	11551.2	0.17033	1.02922	2915.93	0.969	0.104652
Cal705480W	orf19.6459	0.89188	1.00579	10968.9	0.0708371	0.999445	1671.67	0.968	0.939038
Cal414330W	orf19.2891	0.889314	1.00547	10925.4	0.159054	1.02842	2787.5	0.9675	0.375474
Cal100310W	orf19.6092	0.92109	1.00645	11502.9	0.165257	1.02508	2858.54	0.9675	0.449013
Cal101100W	orf19.6056	0.920173	1.00644	11485.2	0.169263	1.02835	2903.68	0.9675	0.00212129
Cal315810C	orf19.6828	0.826607	1.00281	9963.48	0.0722153	0.996571	1691.84	0.9675	1.24239
Cal501080W	orf19.940,orf19.939	0.923843	1.0065	11558.2	0.17107	1.026	2924.03	0.9675	0.143543
Cal506720W	orf19.4336	0.918569	1.00628	11453.5	0.169458	1.02867	2905.95	0.9675	0.0304056
Cal314390W	orf19.7397.3,orf19.7419	0.915243	1.00667	11390.7	0.0866604	1.01677	1894.77	0.967	0.763675
Cal605920W	orf19.5537	0.978043	1.00788	12943.2	0.0475659	0.958595	1311.33	0.967	NaN
Cal127380W	orf19.5279	0.898155	1.00574	11079.5	0.155209	1.02599	2742.81	0.9665	0.757311
Cal208850W	orf19.831	0.925025	1.00688	11582.4	0.169655	1.02858	2908.24	0.9665	0.222739
CalR14850W	orf19.698	0.742177	1.00122	8866.67	0.127286	1.0134	2414.45	0.9665	1.07834
Cal704650W	orf19.6500:orf19.6499	0.913828	1.00649	11364	0.163445	1.02747	2837.87	0.966	0.568514
CalR00500W	orf19.7517:orf19.7516	0.924249	1.00649	11566.8	0.170988	1.02635	2923.09	0.966	0.182434
CalR14300W	orf19.725	0.561816	0.996415	6887.6	0.091922	1.01058	1965.84	0.966	1.61927
CalR10520W	tS(GCU)1:orf19.1735	0.923592	1.00668	11553.3	0.169147	1.02937	2902.03	0.9655	0.33729
Cal116680C	orf19.4436,orf19.4435	0.80733	1.00079	9696.93	0.142687	1.01399	2598.29	0.965	0.81883
Cal213700W	orf19.4109	0.924529	1.00672	11572.5	0.17056	1.02847	2918.5	0.965	0.210718
Cal508620C	orf19.1105	0.785326	1.00153	9403.52	0.136066	1.01944	2519.77	0.965	0.913582
Cal203490W	orf19.1473	0.89126	1.00563	10958.3	0.154444	1.02562	2734.12	0.9645	0.815294
Cal511630W	orf19.4017	0.923714	1.00659	11555.6	0.171481	1.02634	2928.47	0.9645	0.152028
Cal604760W	orf19.3455:orf19.3456	0.49305	0.996414	6193.31	0.0134651	0.78044	625.023	0.964	2.17365
CalR07400W	orf19.2395	0.909808	1.00542	11288.9	0.16919	1.02921	2902.64	0.964	0.149907
Cal302620C	orf19.3154	0.92323	1.00682	11546.6	0.172519	1.02661	2939.8	0.9635	0.160513
Cal406020W	orf19.2733	0.894917	1.00616	11022.5	0.162485	1.02948	2826.33	0.9635	0.321734
CalR12060W	snR161a	0.923659	1.00668	11554.6	0.171565	1.02599	2929.35	0.9625	0.265165
Cal113700W	orf19.2436	0.839694	1.00282	10150	0.158385	1.02639	2780.13	0.962	1.11157
Cal119070C	orf19.384	0.922139	1.00692	11524.4	0.172921	1.02774	2944.12	0.962	0.108894
CalR08950C	orf19.474	0.885562	1.00492	10861.6	0.0839358	1.00848	1857.97	0.962	0.954594
Cal608430C	orf19.5751	0.890246	1.00543	10941.2	0.16219	1.03257	2822.94	0.9615	0.35426
Cal301730W	orf19.5376	0.902413	1.00584	11154.1	0.161654	1.03142	2816.81	0.9615	0.255265
Cal124310C	orf19.998	0.599719	0.998154	7277.14	0.100623	1.00553	2079.66	0.961	1.50048
CalR04850W	orf19.3753	0.980741	1.00758	13041.7	0.0347067	0.907762	1085.58	0.961	NaN
Cal314330C	orf19.7397.1,orf19.7422:orf19.7424,orf19.7398:orf19.7422	0.895769	1.00641	11036.8	0.163931	1.02696	2843.59	0.9605	0.307591
CalR13430C	orf19.3851	0.816527	1.00207	9822.49	0.035305	0.91189	1096.79	0.9605	1.28764
CalR20730W	orf19.7323	0.893324	1.00624	10994.1	0.163716	1.0265	2841.17	0.9605	0.325976
Cal400690C	orf19.5662	0.914248	1.00665	11371.6	0.0886073	1.01576	1921.18	0.96	0.759433
Cal308270C	orf19.356	0.899839	1.00568	11109.6	0.159288	1.02856	2790.03	0.9595	0.720542
Cal110140C	orf19.6844	0.870385	1.00389	10615.4	0.157023	1.02674	2764.19	0.959	0.489318
Cal118730W	orf19.5103	0.901641	1.00568	11140.4	0.16075	1.03065	2806.48	0.959	0.698621
Cal110470W	orf19.782	0.919737	1.00604	11476.5	0.170623	1.02714	2919.1	0.958	0.411536
Cal117360W	orf19.2782	0.897313	1.00581	11064.5	0.158358	1.02667	2779.82	0.9575	0.743169
Cal124570W	orf19.1835	0.822885	1.00283	9910.89	0.146277	1.01804	2641.21	0.9575	0.740341
Cal408390W	orf19.1305:orf19.1304	0.893424	1.0062	10996.1	0.165304	1.02493	2859.04	0.9575	0.317491
Cal708730W	orf19.7181	0.912842	1.00655	11345	0.166638	1.02704	2874.05	0.9575	0.553665
CalR09400W	orf19.501	0.917236	1.00642	11428.6	0.173902	1.02683	2954.48	0.9575	0.00777816
CalR18390C	orf19.6377	0.906567	1.00599	11229.4	0.170589	1.02779	2918.76	0.9575	0.173241
Cal220490W	orf19.4066	0.791854	1.00035	9488.95	0.139739	1.01342	2563.59	0.957	0.875398
Cal408960W	orf19.5312	0.793508	0.999472	9510.99	0.14068	1.01365	2574.59	0.957	0.866913
Cal707110W	orf19.5129	0.904248	1.00619	11186.2	0.0881649	1.01309	1915.19	0.957	0.830143
Cal707360C	orf19.1340:orf19.1339	0.851616	1.00382	10326.4	0.153021	1.02509	2717.62	0.957	0.596798
CalR00350W	orf19.7523	0.807554	1.00038	9699.96	0.0528516	0.95608	1398.38	0.957	1.30532
Cal208970W	orf19.826:orf19.825	0.778068	1.00037	9310.31	0.167039	1.02777	2878.46	0.9565	1.3329
Cal701400W	orf19.7049	0.907564	1.00617	11247.7	0.172027	1.02621	2934.58	0.9565	0.153442
Cal105370W	orf19.2929	0.920577	1.00635	11492.7	0.175813	1.02847	2974.86	0.9565	0.106773
Cal118200W	orf19.5073	0.913665	1.00654	11360.9	0.168223	1.02894	2891.47	0.956	0.533158
Cal313230W	orf19.7354	0.921867	1.00692	11518.8	0.173172	1.02586	2946.76	0.956	0.318198
Cal506660C	orf19.4334	0.77801	1.00039	9309.52	0.033824	0.910985	1068.31	0.956	1.40714
Cal110620W	orf19.775	0.902029	1.00596	11147.1	0.16262	1.02853	2827.9	0.9555	0.686601
CalR04490W	orf19.2605	0.900516	1.00551	11121.2	0.161997	1.0318	2820.63	0.9555	0.700743
CalR05010W	orf19.3746	0.92207	1.00692	11523.1	0.173603	1.02632	2951.2	0.9555	0.296278
Cal310710W	orf19.5931	0.898573	1.00566	11086.9	0.087156	1.01518	1901.42	0.955	0.864084
CalR10400W	orf19.1738.1	0.884608	1.00502	10845.9	0.163625	1.02771	2840.07	0.9545	0.383959
Cal122660W	orf19.4857,orf19.4858	0.921858	1.00699	11518.6	0.175418	1.02949	2970.58	0.954	0.237588
Cal415960C	orf19.3087.1:orf19.3087	0.918473	1.00633	11451.7	0.176908	1.02783	2987.36	0.954	0.059397
Cal214860W	orf19.36.1	0.91837	1.00644	11450	0.176773	1.02869	2985.84	0.9535	0.0544472
CalR18630C	orf19.6393	0.870026	1.00412	10609	0.159251	1.02877	2789.6	0.9535	0.480125
Cal207250W	orf19.909	0.909191	1.00543	11277.5	0.167899	1.02869	2888.08	0.9535	0.587606
Cal317300C	orf19.6752	0.857905	1.00323	10419.5	0.157411	1.02604	2768.61	0.953	0.550129
CalR20070C	orf19.7295	0.617872	1.00111	7468.72	0.181545	1.02797	3039.2	0.953	1.79747
Cal511700C	orf19.4022	0.880863	1.00478	10783.8	0.0758213	0.998773	1744.28	0.9525	0.976514
Cal500860W	orf19.949	0.233126	1.00626	3593.8	0.579064	1.00885	7063.74	0.952	NaN
Cal403140W	orf19.4647	0.903732	1.00592	11177.6	0.165496	1.0248	2860.99	0.952	0.654781
Cal413450W	orf19.4410	0.908892	1.00548	11271.7	0.0888385	1.0176	1924.7	0.9515	0.78701
Cal213590W	orf19.4116	0.920523	1.00644	11491.8	0.174123	1.02688	2956.83	0.9515	0.348604
CalR21290W	orf19.6608	0.785802	1.00143	9409.6	0.139851	1.01271	2565.05	0.951	0.88954
Cal413850W	orf19.2919:orf19.2917.1	0.919102	1.00618	11464.7	0.173457	1.02587	2949.8	0.951	0.390323
Cal214710W	orf19.33	0.919565	1.00623	11473.1	0.177983	1.02707	2999.13	0.9505	0.116673
Cal317010W	orf19.6771	0.905146	1.00564	11203.1	0.162672	1.02752	2828.6	0.95	0.206475
Cal401640C	orf19.4166	0.502089	0.996749	6283.77	0.511857	1.01115	6381.03	0.95	NaN
CalR02950W	orf19.3226	0.90893	1.00545	11272.5	0.0897481	1.01124	1936.89	0.95	0.783474
Cal407290W	orf19.2664	0.906208	1.00582	11223.2	0.174814	1.02886	2964.09	0.949	0.147078
Cal609250W	orf19.4553	0.980106	1.00793	13018.5	0.0344217	0.908506	1080.39	0.948	NaN
Cal302220W	orf19.2501	0.733044	1.003	8756.78	0.13254	1.01239	2477.71	0.9475	1.07834
Cal302250W	orf19.2504	0.917628	1.00639	11436	0.179968	1.02747	3021.51	0.9475	0.0898026
Cal411520W	orf19.740	0.91185	1.00599	11326.1	0.171646	1.02605	2930.17	0.947	0.528916
Cal508000W	orf19.6675:orf19.6676,orf19.1124.2	0.910001	1.00548	11292.4	0.171046	1.02628	2923.74	0.947	0.552958
Cal601890W	orf19.90	0.91562	1.00663	11397.5	0.173666	1.02585	2951.96	0.947	0.455377
Cal407310W	orf19.1440.2	0.661238	1.00087	7937.15	0.114504	1.01977	2256.62	0.947	1.30815
CalR12120W	orf19.5286	0.909502	1.00547	11283.1	0.176793	1.02839	2986.05	0.9465	0.0968736
Cal102230W	tA(AGC)4,tA(AGC)3,tA(AGC)7,tA(AGC)1,tA(AGC)2,tA(AGC)5	0.833648	1.00229	10064.3	0.165742	1.02414	2863.68	0.9465	1.10945
Cal415920W	orf19.3088	0.91849	1.00627	11451.9	0.176563	1.02871	2983.46	0.9465	0.366988
Cal602360C	orf19.115	0.865059	1.00342	10530.3	0.161108	1.02975	2810.63	0.946	0.496389
Cal310630W	orf19.5926	0.91193	1.00593	11327.8	0.171989	1.02641	2934.13	0.946	0.524673
Cal318170W	orf19.6179:orf19.6180,orf19.6178	0.865607	1.00309	10538.9	0.0746163	1.00203	1726.35	0.946	1.04652
Cal407960W	orf19.1324	0.918747	1.00609	11457.1	0.179839	1.02795	3020.08	0.946	0.131522
CalR15850W	orf19.1816	0.797937	0.999576	9570.62	0.146655	1.01676	2645.42	0.946	0.827315
Cal507160C	orf19.2652	0.756257	1.00322	9036.31	0.136927	1.01695	2530.45	0.9455	0.993485
CalR16350W	orf19.6142	0.00886059	0.944044	491.671	0.463493	1.0119	5898.16	0.945	NaN
Cal209100C	orf19.815	0.773696	0.999898	9253.52	0.169101	1.02996	2901.65	0.9445	1.33148
Cal605270W	orf19.3477:orf19.3478	0.909799	1.00549	11288.8	0.179182	1.02704	3012.38	0.9445	0.0714178
Cal110690C	orf19.772	0.87387	1.00471	10671.4	0.16566	1.02494	2862.87	0.944	0.434164
Cal601690W	orf19.3642	0.915248	1.0066	11390.9	0.175639	1.02912	2973.01	0.9435	0.441942
Cal704910C	orf19.6487	0.872079	1.00409	10641.9	0.165817	1.02416	2864.51	0.9435	0.441942
Cal107450W	orf19.3031	0.858986	1.00328	10436.7	0.163222	1.02785	2835.21	0.9435	0.973686
Cal119060W	orf19.382,orf19.1435	0.896667	1.00617	11053	0.165678	1.02462	2863.05	0.9435	0.710642
Cal129070C	orf19.6351	0.890029	1.00565	10937.1	0.180542	1.02913	3028.16	0.9435	0.287792
Cal415930W	orf19.3087.2	0.834139	1.00238	10071.6	0.0405845	0.936417	1191.73	0.9435	1.19713
Cal108350C	orf19.1036	0.792014	0.999938	9491.14	0.167855	1.02929	2887.56	0.943	1.26572
Cal115740C	tP(AGG)1:orf19.6213	0.919571	1.00608	11473.3	0.178707	1.02757	3007.06	0.943	0.2786
Cal112560W	tN(GUU)2	0.884876	1.00493	10850.8	0.159963	1.03108	2797.61	0.9425	0.818123
Cal123340C	orf19.4887	0.866799	1.00303	10557.4	0.162334	1.03077	2824.61	0.9425	0.929845
Cal208460W	tF(GAA)2,tF(GAA)3,tF(GAA)4,tF(GAA)1,tF(GAA)5	0.915769	1.00671	11400.1	0.176822	1.02815	2986.45	0.9425	0.420729
Cal306700C	orf19.278:orf19.279	0.907667	1.00613	11249.7	0.178148	1.02721	3000.9	0.9425	0.108187
Cal606960W	orf19.5597	0.919475	1.00621	11471.5	0.179787	1.02807	3019.4	0.9425	0.201525
Cal101980C	orf19.6014	0.910701	1.0058	11305.4	0.17429	1.02745	2958.53	0.942	0.523259
Cal304980W	orf19.1632	0.916352	1.00682	11411.3	0.176747	1.02937	2985.53	0.942	0.411536
Cal403940W	orf19.4615,orf19.4614	0.863633	1.00353	10507.8	0.162328	1.03118	2824.51	0.942	0.497803
Cal406090W	orf19.2727	0.885233	1.00486	10856.6	0.170306	1.02951	2915.74	0.942	0.346482
Cal609060C	orf19.1215,orf19.1214	0.875544	1.00464	10697.6	0.166689	1.02605	2874.71	0.942	0.421436
CalR00710C	orf19.7507	0.885604	1.00489	10862.3	0.0873616	1.0127	1904.3	0.942	0.923481
CalR09950W	orf19.535	0.911623	1.00605	11322.1	0.180406	1.02917	3026.62	0.942	0.0339412
CalR14100W	orf19.3885	0.89605	1.00634	11042.2	0.177871	1.02724	2997.98	0.942	0.236174
Cal116900W	orf19.4424	0.742805	1.00151	8874.07	0.172043	1.02588	2934.74	0.9415	1.42906
Cal133100C	orf19.7266	0.916923	1.00661	11422.5	0.178433	1.0264	3003.98	0.9415	0.376888
Cal303530C	orf19.1691	0.918661	1.00623	11455.4	0.181165	1.02703	3035.01	0.9405	0.225567
Cal128160C	orf19.5237	0.807444	1.00059	9698.35	0.17192	1.02684	2933.36	0.94	1.19925
Cal117300W	orf19.2785	0.764549	1.00202	9138.89	0.170963	1.02706	2922.82	0.9395	1.3527
Cal130070W	orf19.4940	0.766447	1.00215	9163.35	0.141633	1.01698	2585.81	0.9395	0.939745
Cal130930W	orf19.4981	0.900349	1.00571	11118.3	0.178397	1.027	3003.48	0.939	0.183848
Cal214270W	snR54	0.918458	1.00646	11451.5	0.181565	1.02728	3039.4	0.939	0.202233
Cal301830C	orf19.1289	0.908626	1.00534	11267.1	0.181355	1.0277	3037.04	0.939	0.0692965
Cal307710C	orf19.333	0.332614	1.00262	4606.38	0.0621118	0.99889	1542.88	0.939	2.24153
Cal205580W	orf19.1580	0.908422	1.0055	11263.4	0.180747	1.02868	3030.48	0.9385	0.0784889
CalR02910W	orf19.3227	0.692723	1.00065	8288.01	0.127761	1.01272	2420.37	0.938	1.19501
Cal303750C	orf19.1681	0.916578	1.00669	11415.8	0.180411	1.02879	3026.7	0.9375	0.355675
Cal130090C	orf19.4941	0.911921	1.00599	11327.6	0.176901	1.0282	2987.25	0.937	0.483661
Cal216350W	orf19.2286	0.916498	1.00675	11414.4	0.180785	1.02809	3030.93	0.937	0.352139
Cal132920W	orf19.7251	0.902433	1.00579	11154.5	0.179594	1.02737	3017.25	0.9365	0.154856
Cal133240C	orf19.7272	0.776609	1.00018	9291.38	0.169199	1.02883	2902.78	0.9365	1.30885
Cal214620W	orf19.31	0.663007	1.00052	7956.24	0.176386	1.02975	2981.3	0.9365	1.66099
Cal603590C	orf19.3425	0.913215	1.00673	11352.4	0.177718	1.02759	2996.33	0.9365	0.45467
CalR09680W	orf19.518	0.917313	1.00627	11430	0.18201	1.0274	3044.42	0.9365	0.296278
Cal129900C	orf19.4932	0.899236	1.00555	11099	0.171513	1.02611	2928.77	0.9365	0.658316
CalR00480W	orf19.7518	0.917313	1.00627	11430	0.181155	1.02737	3034.87	0.9365	0.318905
CalR17180W	orf19.6287	0.392288	0.995316	5196.21	0.192682	1.03177	3162.7	0.936	2.34759
CalR06910W	orf19.2422	0.894876	1.00634	11021.8	0.169952	1.02909	2911.74	0.935	0.702864
CalR17660C	orf19.3710	0.902356	1.00593	11153	0.180794	1.02774	3031	0.935	0.147078
Cal410990W	orf19.3793	0.899102	1.00571	11096.6	0.180034	1.02745	3022.14	0.9345	0.184555
Cal501290W	orf19.931	0.914544	1.00667	11377.1	0.185397	1.02692	3081.79	0.9345	0.092631
Cal509180W	orf19.3894	0.917136	1.00638	11426.5	0.183809	1.02635	3064.49	0.9345	0.207182
CalR15890W	orf19.1814	0.821557	1.00213	9892.46	0.0595769	0.983223	1504.53	0.9345	1.22117
Cal100530C	tT(AGU)6,tT(AGU)1,tT(AGU)4,tT(AGU)3	0.883616	1.00499	10829.3	0.165031	1.02719	2855.83	0.934	0.803273
Cal113150W	orf19.2461	0.917125	1.00645	11426.3	0.183527	1.02636	3061.41	0.934	0.173948
Cal218340W	orf19.2167:orf19.2166	0.865217	1.00328	10532.7	0.168161	1.02899	2890.79	0.934	0.466691
Cal212790C	orf19.6881:orf19.6882	0.598729	0.998457	7267.13	0.107496	1.0121	2168.19	0.933	1.46088
Cal500800W	orf19.952	0.916965	1.0065	11423.4	0.182776	1.02732	3052.8	0.933	0.289914
Cal221880W	orf19.1375	0.90494	1.00564	11199.4	0.183248	1.02679	3058.22	0.9325	0.10253
Cal222490W	orf19.1783	0.880836	1.00483	10783.4	0.162935	1.02694	2831.72	0.9325	0.826608
Cal412050W	orf19.1792	0.840993	1.00329	10168.8	0.0891505	1.01716	1928.91	0.9325	1.12784
Cal609480W	orf19.1078	0.816853	1.00205	9827.17	0.0765079	0.996047	1754.23	0.9325	1.224
Cal312600W	orf19.6985	0.896329	1.00603	11047.1	0.0930331	1.01433	1980.73	0.932	0.837214
Cal131570W	orf19.5014	0.799184	0.999843	9587.66	0.151553	1.02188	2701.05	0.932	0.796202
Cal607510W	orf19.5625	0.916677	1.00649	11417.6	0.184023	1.02518	3066.84	0.932	0.264458
Cal114780W	orf19.6257	0.899229	1.00562	11098.8	0.175353	1.02952	2969.9	0.9315	0.635689
Cal703120W	orf19.6583	0.915255	1.00645	11391	0.183207	1.02695	3057.63	0.9315	0.347189
Cal506270W	snR10c	0.914585	1.00663	11377.9	0.183268	1.0265	3058.53	0.9315	0.362746
CalR10140C	orf19.543	0.880043	1.00456	10770.8	0.0890945	1.01732	1928.32	0.9315	0.936917
Cal112080W	orf19.430	0.865001	1.00343	10529.4	0.169471	1.02789	2906.21	0.931	0.461034
Cal500420C	orf19.978	0.89107	1.00558	10955.1	0.169295	1.02811	2904.06	0.931	0.732563
Cal129790W	snR70	0.916265	1.00688	11409.5	0.185144	1.02669	3079.14	0.9305	0.178898
Cal310210C	orf19.5904	0.877146	1.00433	10724.4	0.172841	1.02769	2943.27	0.9305	0.383959
Cal500710W	orf19.954	0.877054	1.00439	10722.8	0.172975	1.0268	2944.74	0.9305	0.383959
Cal106480W	orf19.2977	0.8869	1.00557	10884.1	0.167539	1.0291	2884.19	0.93	0.770746
Cal400740W	orf19.5663,orf19.5664	0.888638	1.00573	10914.3	0.17228	1.02688	2937.3	0.93	0.296985
Cal503720C	orf19.3207	0.860259	1.00299	10456.2	0.0888923	1.01742	1925.45	0.93	1.03945
Cal211140C	orf19.3523	0.828487	1.00224	9990.92	0.16583	1.02381	2864.67	0.9295	1.10804
[truncated: 12,491 more rows]

## Sheet: RNAseq data 
Feature	Orf	Gene	baseMean	log2FoldChange	lfcSE	stat	pvalue	padj
C5_04930C_A	orf19.3981	MAL31	97.8	10	1.5	6.66	2.76e-11	0	Upregulated
C1_13100W_A	orf19.4936.1		53.05	9.13	1.58	5.77	7.7e-09	0	Upregulated
C1_01980W_A	orf19.4527	HGT1	49.46	9.03	1.56	5.79	7.02e-09	0	Upregulated
C4_03470C_A	orf19.3374	ECE1	548.91	9.02	1.2	7.49	6.87e-14	0	Upregulated
C6_01070C_A	orf19.113	CIP1	703.41	8.55	1.83	4.67	3e-06	0	Upregulated
C1_00780C_A	orf19.6028	HGC1	21.12	7.8	1.69	4.61	3.99e-06	0	Upregulated
C1_06280C_A	orf19.1822	UME6	20	7.73	1.72	4.5	6.95e-06	0	Upregulated
C1_07670W_A	orf19.1227	ZCF4	18.83	7.63	1.69	4.52	6.28e-06	0	Upregulated
CR_00620C_A	orf19.7469	ARG1	3574.43	7.21	0.27	26.65	1.84e-156	0	Upregulated
C4_00720W_A	orf19.4170	CSP2	12.65	7.04	1.97	3.56	0.000366	0.01	Upregulated
C4_03570W_A	orf19.1321	HWP1	102.11	7.03	0.97	7.26	3.96e-13	0	Upregulated
C7_00110W_A	orf19.7111.1	SOD3	9.98	6.7	1.88	3.56	0.000373	0.01	Upregulated
CR_01630C_A	orf19.2552	-	9.87	6.69	1.88	3.56	0.000373	0.01	Upregulated
C1_05920W_A	orf19.2457	-	9.1	6.57	1.93	3.4	0.000685	0.02	Upregulated
C3_02300W_A	orf19.1616	FGR23	8.84	6.52	2	3.26	0.00113	0.03	Upregulated
C5_03650C_A	orf19.6678	-	7.99	6.38	1.98	3.23	0.00123	0.03	Upregulated
CR_07740W_A	orf19.2633.1	-	21.73	6.36	1.65	3.85	0.000118	0	Upregulated
C2_05770W_A	orf19.6888	-	6.23	6.03	2.09	2.89	0.00385	0.08	Upregulated
C7_01380W_A	orf19.6919	-	6.11	6.01	2.1	2.86	0.00422	0.09	Upregulated
CR_08820C_A	orf19.6834.10	TAR1	5.81	5.92	2.14	2.77	0.00563	0.11	Upregulated
C5_03430W_A	orf19.2638	-	5.67	5.89	2.15	2.74	0.0061	0.12	Upregulated
CR_01860W_A	orf19.2584	OPT9	5.49	5.84	2.17	2.69	0.00707	0.13	Upregulated
C4_07040W_A	orf19.3105	-	5.08	5.72	2.27	2.52	0.0119	0.19	Upregulated
C4_01850C_A	orf19.4608	PDC12	4.96	5.69	2.25	2.53	0.0113	0.19	Upregulated
C6_03230W_A	orf19.5610	ARG3	731.69	5.56	0.31	17.9	1.14e-71	0	Upregulated
C4_04790W_A	orf19.3801	FAV1	4.35	5.51	2.31	2.38	0.0172	0.25	Upregulated
C3_00600W_A	orf19.5399	IFF11	4.23	5.45	2.46	2.22	0.0268	0.33	Upregulated
C6_03700W_A	orf19.5741	ALS1	456.13	5.38	0.39	13.77	3.82e-43	0	Upregulated
C3_04570C_A	orf19.5915	DUR35	3.99	5.38	2.38	2.26	0.0237	0.3	Upregulated
C3_04480C_A	orf19.5902	RAS2	3.85	5.33	2.4	2.22	0.0263	0.32	Upregulated
C4_01550C_A	orf19.4630	CPA1	934.25	5.26	0.27	19.62	9.57e-86	0	Upregulated
C5_02630C_A	orf19.4279	MNN1	67.43	5.13	1.84	2.79	0.00527	0.11	Upregulated
C7_03570W_A	orf19.6689	ARG4	1021.8	5.11	0.26	19.77	5.72e-87	0	Upregulated
CR_03790C_A	orf19.4377	KRE1	195.07	5	0.47	10.65	1.79e-26	0	Upregulated
CR_10340W_A	orf19.7610	PTP3	3246.28	4.95	0.25	19.53	6.15e-85	0	Upregulated
C1_05140W_A	orf19.4056	BRG1	271.36	4.82	0.39	12.44	1.53e-35	0	Upregulated
C4_05070C_A	orf19.3770	ARG8	647.83	4.8	0.29	16.83	1.49e-63	0	Upregulated
CR_01330W_A	orf19.3221	CPA2	2182.78	4.74	0.22	21.26	2.66e-100	0	Upregulated
C1_09290C_A	orf19.4788	ARG5,6	2279.33	4.62	0.22	20.62	1.65e-94	0	Upregulated
C1_11480W_A	orf19.655	PHO84	170.55	4.51	1.45	3.12	0.00181	0.04	Upregulated
C5_00870C_A	orf19.1980	GIT4	6.26	4.51	2.04	2.21	0.0268	0.33	Upregulated
CR_00740C_A	orf19.3282	BMT3	90.05	4.48	0.57	7.92	2.38e-15	0	Upregulated
C4_04380C_A	orf19.1409.2	-	23.18	4.43	1.09	4.08	4.56e-05	0	Upregulated
CR_07070C_A	orf19.1816	ALS3	731.7	4.42	0.27	16.63	4.05e-62	0	Upregulated
C4_05900C_A	orf19.1277	-	41.97	4.29	0.86	4.98	6.5e-07	0	Upregulated
C3_03690W_A	orf19.6950	-	28.41	3.88	0.88	4.41	1.05e-05	0	Upregulated
C6_01060C_A	orf19.111	CAN2	380.47	3.87	0.36	10.61	2.67e-26	0	Upregulated
C4_01800W_A	orf19.4612	-	15.86	3.86	1.23	3.13	0.00174	0.04	Upregulated
CR_03890W_A	orf19.467	WOR3	61.04	3.76	0.64	5.86	4.63e-09	0	Upregulated
C1_13450W_A	orf19.4975	HYR1	104.31	3.62	0.51	7.06	1.68e-12	0	Upregulated
C1_06340W_A	orf19.6277	-	13.79	3.61	1.42	2.54	0.011	0.18	Upregulated
C2_09460C_A	orf19.1604	RHA1	843.37	3.47	1.02	3.41	0.000646	0.02	Upregulated
C6_01990W_A	orf19.689	PLB1	37.45	3.47	0.85	4.1	4.15e-05	0	Upregulated
C5_03930C_A	orf19.3219	-	290.52	3.43	0.32	10.67	1.41e-26	0	Upregulated
C2_09880C_A	orf19.1363	-	16.71	3.33	1.19	2.8	0.00513	0.11	Upregulated
C4_03520C_A	orf19.1327	RBT1	31.18	3.31	0.86	3.87	0.00011	0	Upregulated
C2_08050C_A	orf19.2179	SIT1	153.84	3.29	0.5	6.61	3.84e-11	0	Upregulated
C1_09180W_A	orf19.4776	LYS143	101.36	3.27	0.48	6.81	9.87e-12	0	Upregulated
C4_00450C_A	orf19.5674	PGA10	33.53	3.17	0.84	3.79	0.000153	0.01	Upregulated
C1_00680W_A	orf19.6037	ASM3	118.62	3.13	0.49	6.42	1.33e-10	0	Upregulated
C7_02150C_A	orf19.6500	ECM42	338.99	3.1	0.4	7.76	8.3e-15	0	Upregulated
C1_02590C_A	C1_02590C_A	SNZ1	1135.58	3.05	0.25	12.28	1.16e-34	0	Upregulated
CR_02490W_A	orf19.176	OPT4	45.23	3.04	0.7	4.34	1.46e-05	0	Upregulated
C3_04530C_A	orf19.5908	TEC1	691.74	3.02	0.26	11.56	6.94e-31	0	Upregulated
C7_00660W_A	orf19.7053	GAC1	218.54	3.01	0.36	8.46	2.7e-17	0	Upregulated
C3_00360W_A	orf19.5431	-	184.37	2.99	0.44	6.79	1.12e-11	0	Upregulated
C4_02030W_A	orf19.4590	RFX2	88.43	2.97	0.52	5.67	1.42e-08	0	Upregulated
C6_03850C_A	orf19.5760	IHD1	275.73	2.93	0.35	8.42	3.68e-17	0	Upregulated
C1_06140C_A	orf19.2431	-	17.11	2.88	1.2	2.41	0.016	0.24	Upregulated
C1_01930W_A	orf19.4530.1	-	158	2.86	0.54	5.31	1.08e-07	0	Upregulated
C1_04900W_A	orf19.753	MNN15	317.74	2.76	0.34	8.22	2.08e-16	0	Upregulated
C1_13160W_A	orf19.4943	PSA2	41.95	2.66	0.67	3.99	6.47e-05	0	Upregulated
C6_03320W_A	orf19.5620	-	822.55	2.6	0.26	9.91	3.75e-23	0	Upregulated
C1_04020C_A	orf19.4477	CSH1	198.73	2.58	0.35	7.32	2.46e-13	0	Upregulated
C6_02450W_A	orf19.5514	-	31.64	2.53	0.74	3.43	0.000601	0.02	Upregulated
C7_00430W_A	orf19.7077	-	68.96	2.5	0.56	4.51	6.52e-06	0	Upregulated
C3_02610C_A	orf19.251	GLX3	271.13	2.46	0.36	6.76	1.42e-11	0	Upregulated
C4_01380W_A	orf19.4649	ZCF27	401.18	2.45	0.31	7.81	5.93e-15	0	Upregulated
C4_02990C_A	orf19.2693	GST2	120.28	2.45	0.41	6.04	1.56e-09	0	Upregulated
C3_07180C_A	orf19.6782	BMT1	479.03	2.44	0.28	8.67	4.44e-18	0	Upregulated
CR_08800W_A	-	ITS2	343.98	2.42	0.35	6.98	2.93e-12	0	Upregulated
CR_06790C_A	orf19.1855	-	103.23	2.41	0.45	5.38	7.37e-08	0	Upregulated
C4_02360W_A	orf19.2768	AMS1	115.88	2.41	0.47	5.13	2.97e-07	0	Upregulated
CR_07810W_A	orf19.3710	YHB5	73.85	2.39	0.61	3.9	9.81e-05	0	Upregulated
C7_03480W_A	orf19.6705	-	436.21	2.38	0.28	8.59	9e-18	0	Upregulated
CR_09930W_A	orf19.7567	-	26.97	2.38	0.9	2.64	0.0083	0.15	Upregulated
C1_10300W_A	orf19.4900	MNN12	210.47	2.35	0.34	6.91	4.72e-12	0	Upregulated
C3_01800C_A	orf19.1666	-	247.76	2.34	0.35	6.61	3.72e-11	0	Upregulated
C7_01560C_A	orf19.6570	NUP	26.9	2.34	0.84	2.79	0.00523	0.11	Upregulated
CR_06660W_A	orf19.700	SEO1	538	2.33	0.3	7.9	2.74e-15	0	Upregulated
C2_03750W_A	orf19.847	YIM1	364.66	2.33	0.32	7.26	3.79e-13	0	Upregulated
C6_00840W_A	orf19.85	GPX2	1321.54	2.33	0.22	10.63	2.23e-26	0	Upregulated
CR_04275W_A	-	SCR1	15.15	2.26	1.03	2.2	0.0276	0.33	Upregulated
C2_05360C_A	orf19.3567	BIO32	30.37	2.26	0.82	2.77	0.00563	0.11	Upregulated
C3_05610W_A	orf19.6996	MNN14	52.77	2.25	0.64	3.52	0.000426	0.01	Upregulated
C4_05560C_A	orf19.1237	ARO9	19.4	2.24	0.91	2.46	0.0137	0.21	Upregulated
C2_01300C_A	orf19.1995	MNN24	345.27	2.24	0.32	6.9	5.08e-12	0	Upregulated
CR_09880W_A	orf19.7561	DEF1	1106.7	2.24	0.35	6.41	1.47e-10	0	Upregulated
C4_05780C_A	C4_05780C_A	CFL2	305.78	2.24	0.93	2.39	0.0167	0.24	Upregulated
C2_06630C_A	orf19.36.1		46.52	2.21	0.62	3.58	0.000346	0.01	Upregulated
CR_08780W_A	-	ITS1	227.04	2.18	0.4	5.51	3.61e-08	0	Upregulated
C5_04830W_A	orf19.3969	SFL2	154.57	2.16	0.38	5.62	1.86e-08	0	Upregulated
CR_08790W_A	-	RDN58	535.02	2.16	0.31	6.98	2.94e-12	0	Upregulated
C4_05730W_A	orf19.1258	-	364.59	2.11	0.29	7.28	3.23e-13	0	Upregulated
C1_00120C_A	orf19.6096	TRP1	111.48	2.09	0.47	4.42	9.95e-06	0	Upregulated
C4_03710C_A	orf19.1307	-	18.9	2.09	0.95	2.2	0.0275	0.33	Upregulated
C1_08170C_A	orf19.5094	BUL1	132.4	2.04	0.38	5.33	9.6e-08	0	Upregulated
CR_07290W_A	orf19.6139	FRE7	58.76	2.02	0.85	2.37	0.0177	0.25	Upregulated
C2_00780W_A	orf19.2046	POT1-2	35.59	2.02	0.78	2.59	0.00956	0.17	Upregulated
C5_05450C_A	orf19.4044	MUM2	43.61	2	0.72	2.76	0.00573	0.11	Upregulated
C7_01390W_A	orf19.6920	-	46.17	1.99	0.6	3.33	0.000876	0.02	Upregulated
C3_05580C_A	orf19.6993	GAP2	42.45	1.98	0.69	2.88	0.00397	0.09	Upregulated
C5_02860C_A	orf19.4309	GRP2	425.55	1.96	0.35	5.54	3.09e-08	0	Upregulated
C3_06000W_A	orf19.7381	AHR1	281.96	1.94	0.31	6.23	4.65e-10	0	Upregulated
C1_02630C_A	orf19.2952	EXG2	50.4	1.93	0.62	3.14	0.00171	0.04	Upregulated
C1_00290W_A	orf19.6078	POL93	51.38	1.89	0.61	3.09	0.00201	0.05	Upregulated
C4_04770C_A	orf19.3803	MNN22	761.76	1.89	0.24	7.77	7.63e-15	0	Upregulated
C1_08900W_A	orf19.4749	-	141.53	1.88	0.37	5.06	4.13e-07	0	Upregulated
C1_08330C_A	orf19.5113	ADH2	79.66	1.87	0.66	2.83	0.00469	0.1	Upregulated
C6_00790C_A	orf19.3646	CTR1	276.06	1.86	0.42	4.4	1.09e-05	0	Upregulated
C5_03740W_A	orf19.1121	-	96.61	1.84	0.46	4.02	5.72e-05	0	Upregulated
C2_05070W_A	orf19.3538	FRE9	32.56	1.82	0.71	2.57	0.0102	0.17	Upregulated
C1_00350C_A	orf19.6073	HMX1	178.73	1.8	0.47	3.82	0.000135	0.01	Upregulated
C1_07160C_A	orf19.4450.1	-	47.94	1.8	0.82	2.18	0.0292	0.34	Upregulated
C2_09220W_A	orf19.4082	DDR48	164.45	1.79	0.49	3.65	0.000259	0.01	Upregulated
CR_09530C_A	orf19.6608	-	200.9	1.76	0.36	4.95	7.35e-07	0	Upregulated
C4_02340W_A	orf19.2769	-	173.8	1.71	0.35	4.83	1.39e-06	0	Upregulated
CR_10640W_A	orf19.7648	-	117.69	1.71	0.4	4.28	1.85e-05	0	Upregulated
C2_06890C_A	orf19.2244	-	72.87	1.7	0.51	3.33	0.000859	0.02	Upregulated
C4_06480C_A	orf19.2886	CEK1	95.39	1.68	0.5	3.36	0.000783	0.02	Upregulated
C7_01680C_A	orf19.6556	-	87.15	1.66	0.53	3.15	0.00161	0.04	Upregulated
C3_04660C_A	orf19.5926	ARG11	63.24	1.66	0.53	3.11	0.00185	0.04	Upregulated
C3_00910W_A	orf19.6168	-	44.32	1.64	0.67	2.43	0.0149	0.23	Upregulated
CR_00290W_A	orf19.7504	-	235.13	1.62	0.37	4.38	1.18e-05	0	Upregulated
CR_10840C_A	orf19.7676	XYL2	587.22	1.59	0.4	3.98	7e-05	0	Upregulated
C1_08940C_A	orf19.4752	MSN4	408.31	1.59	0.3	5.3	1.18e-07	0	Upregulated
C1_13620W_A	orf19.4998	ROB1	2520.92	1.56	0.2	7.72	1.12e-14	0	Upregulated
C1_14480W_A	orf19.7266	-	43.02	1.56	0.65	2.38	0.0174	0.25	Upregulated
C2_08920W_A	orf19.215	-	152.15	1.55	0.39	4.01	5.97e-05	0	Upregulated
C3_07360W_A	orf19.6755	DLD2	259.54	1.55	0.32	4.84	1.28e-06	0	Upregulated
C3_06470W_A	orf19.7436	AAF1	112.05	1.52	0.4	3.79	0.000149	0.01	Upregulated
C1_13480W_A			549.6	1.48	0.26	5.7	1.18e-08	0
C2_06970W_A			116.67	1.48	0.45	3.29	0.000997	0.03
C2_07750W_A			48.93	1.47	0.57	2.58	0.00996	0.17
CR_08510W_A			64.26	1.46	0.56	2.61	0.00905	0.16
CR_09920W_A			70.93	1.45	0.5	2.87	0.00406	0.09
C2_04460W_A			903.25	1.43	0.23	6.24	4.42e-10	0
C4_05140C_A			314.71	1.43	0.36	4.01	6.06e-05	0
CR_04870C_A			53.95	1.43	0.57	2.52	0.0118	0.19
CR_06440C_A			242.82	1.41	0.31	4.58	4.62e-06	0
C7_03860W_A			434.04	1.4	0.32	4.45	8.71e-06	0
C7_00970C_A			170.66	1.4	0.36	3.84	0.000121	0
C2_03320W_A			147.49	1.4	0.39	3.58	0.000347	0.01
C1_14220C_A			104.24	1.37	0.43	3.22	0.00128	0.03
C1_08310W_A			67.12	1.37	0.53	2.61	0.00919	0.16
C2_04050C_A			754.19	1.34	0.32	4.24	2.2e-05	0
C5_00450C_A			109.27	1.34	0.41	3.28	0.00104	0.03
C2_03030W_A			45.75	1.33	0.6	2.2	0.0278	0.33
C6_04130C_A			490.04	1.33	0.29	4.5	6.8e-06	0
C1_02600W_A			140.53	1.32	0.44	2.97	0.00295	0.07
C3_01940C_A			83.32	1.32	0.54	2.45	0.0144	0.22
C1_02970W_A			856.38	1.32	0.23	5.83	5.56e-09	0
C3_04610W_A			82.11	1.31	0.46	2.83	0.00467	0.1
C2_00340C_A			1339.3	1.3	0.21	6.17	6.69e-10	0
C3_07730W_A			193.29	1.3	0.33	3.88	0.000102	0
C2_10210C_A			756.61	1.28	0.26	4.99	6.12e-07	0
C3_00710W_A			466.25	1.28	0.26	4.98	6.34e-07	0
CR_02130W_A			255.14	1.27	0.34	3.71	0.000211	0.01
C6_04380W_A			672.9	1.25	0.29	4.39	1.15e-05	0
C2_06680W_A			83.54	1.25	0.53	2.35	0.0188	0.26
C2_09870W_A			134.41	1.25	0.38	3.29	0.000992	0.03
C2_02950W_A			193.36	1.25	0.34	3.73	0.000191	0.01
CR_08810W_A			17610.3	1.23	0.26	4.76	1.91e-06	0
C1_12360C_A			324.74	1.22	0.4	3.07	0.00212	0.05
C3_01180C_A			519.08	1.22	0.26	4.62	3.92e-06	0
C3_06330W_A			2859.71	1.21	0.24	5.1	3.33e-07	0
C4_02640C_A			82.77	1.21	0.49	2.48	0.0133	0.21
C7_01510W_A			112.92	1.21	0.42	2.87	0.00411	0.09
C7_02160W_A			86.03	1.17	0.45	2.62	0.0089	0.16
C3_06590W_A			1397.44	1.17	0.21	5.5	3.74e-08	0
C1_13730C_A			95.59	1.17	0.45	2.59	0.00961	0.17
CR_04500C_A			147.97	1.17	0.37	3.13	0.00176	0.04
C7_00240W_A			111.4	1.15	0.42	2.78	0.00547	0.11
C2_06940C_A			101.62	1.14	0.52	2.2	0.0277	0.33
C2_09980W_A			91.37	1.14	0.46	2.49	0.0129	0.21
C4_05770C_A			110.63	1.13	0.44	2.57	0.0101	0.17
C5_02460C_A			67.55	1.13	0.49	2.32	0.0205	0.27
C5_03150W_A			294.72	1.13	0.3	3.81	0.000139	0.01
C5_01560C_A			71.31	1.13	0.5	2.26	0.0236	0.3
C4_00650W_A			603.73	1.12	0.25	4.41	1.03e-05	0
CR_01780W_A			86.85	1.12	0.47	2.35	0.0186	0.26
C6_02010C_A			992.89	1.11	0.29	3.8	0.000145	0.01
C2_07140W_A			436.8	1.11	0.31	3.55	0.000386	0.01
C6_00830C_A			300.3	1.11	0.3	3.7	0.000217	0.01
C5_01070C_A			678.37	1.1	0.24	4.64	3.51e-06	0
CR_02910W_A			77.97	1.09	0.46	2.38	0.0173	0.25
C1_04410C_A			130.14	1.09	0.39	2.8	0.00513	0.11
C2_05780C_A			192.23	1.08	0.34	3.2	0.00135	0.03
C1_05990C_A			110.23	1.06	0.4	2.66	0.00785	0.14
C3_07560W_A			344.51	1.06	0.3	3.51	0.000454	0.01
CR_00510C_A			301.41	1.05	0.32	3.27	0.00106	0.03
C1_13070C_A			236.75	1.04	0.31	3.3	0.00097	0.03
C3_00560C_A			206.31	1.03	0.32	3.26	0.00112	0.03
C2_02640C_A			137.77	1.03	0.37	2.76	0.00587	0.12
C1_09720W_A			813.41	1.03	0.35	2.9	0.00375	0.08
C3_00010C_A			121.85	1.03	0.42	2.42	0.0155	0.23
C3_03110W_A			79.12	1.02	0.47	2.18	0.0289	0.34
C3_05590C_A			720.49	1.02	0.23	4.46	8.35e-06	0
C6_01040C_A			146.81	1.02	0.42	2.43	0.0151	0.23
C1_05560W_A			335.68	1.02	0.3	3.44	0.000581	0.02
C3_07440W_A			5908.71	1.01	0.28	3.62	0.00029	0.01
C3_00350W_A			100.73	1.01	0.42	2.4	0.0164	0.24
C5_04560C_A			574.07	1.01	0.27	3.66	0.000249	0.01
CR_09010C_A			705.69	1	0.24	4.24	2.19e-05	0
CR_02820W_A			636.1	1	0.37	2.68	0.00735	0.13
C1_05300C_A			345.74	0.99	0.39	2.56	0.0103	0.17
C2_09750W_A			362.45	0.99	0.29	3.42	0.000634	0.02
C4_00200C_A			1083.15	0.99	0.27	3.62	0.000293	0.01
C6_02560W_A			612.92	0.99	0.35	2.84	0.00446	0.09
C7_01470C_A			300.94	0.99	0.28	3.47	0.000513	0.02
C3_02170C_A			487.17	0.98	0.29	3.33	0.000863	0.02
C3_04880W_A			267.36	0.98	0.31	3.11	0.00187	0.04
C2_08910C_A			120.66	0.97	0.39	2.52	0.0118	0.19
C1_12030W_A			1468.69	0.97	0.23	4.29	1.75e-05	0
C1_07120W_A			926.9	0.97	0.24	4	6.42e-05	0
C7_03590C_A			159.37	0.96	0.38	2.54	0.011	0.18
C3_07170C_A			382.6	0.96	0.28	3.48	0.000506	0.02
C1_09430W_A			231.59	0.95	0.37	2.58	0.01	0.17
C4_03090W_A			104.14	0.95	0.41	2.33	0.0196	0.26
C3_05710W_A			911.48	0.95	0.23	4.12	3.74e-05	0
C7_04090C_A			155.4	0.94	0.38	2.48	0.013	0.21
C7_00690W_A			186.91	0.94	0.39	2.42	0.0157	0.23
C6_03100W_A			312.01	0.93	0.31	3.04	0.00235	0.05
C3_05170W_A			322.91	0.93	0.28	3.35	0.00082	0.02
C6_03340C_A			339.18	0.92	0.3	3.12	0.00181	0.04
C3_01820W_A			125.3	0.92	0.39	2.38	0.0172	0.25
C2_05660W_A			205.67	0.92	0.35	2.62	0.00892	0.16
C1_01210W_A			113.98	0.91	0.42	2.2	0.028	0.33
C1_13870W_A			597.96	0.91	0.39	2.35	0.0188	0.26
C2_05890C_A			720.68	0.91	0.24	3.8	0.000146	0.01
CR_08000C_A			546.77	0.9	0.26	3.44	0.000585	0.02
CR_02300C_A			156.28	0.9	0.38	2.34	0.0193	0.26
C3_07480W_A			145.83	0.89	0.37	2.42	0.0157	0.23
C2_03270W_A			10201.4	0.89	0.25	3.56	0.000372	0.01
C2_06190W_A			651.96	0.89	0.27	3.31	0.000925	0.02
C3_03040W_A			651.37	0.89	0.26	3.47	0.000512	0.02
CR_08050C_A			179.67	0.88	0.34	2.6	0.00935	0.16
C6_02090C_A			132.96	0.87	0.39	2.24	0.0253	0.31
C2_00390C_A			233.47	0.87	0.33	2.64	0.00835	0.15
C5_02230W_A			366.07	0.87	0.29	2.97	0.00293	0.07
CR_09440C_A			222.13	0.87	0.38	2.28	0.0227	0.29
CR_07080W_A			511.57	0.86	0.26	3.32	0.000905	0.02
CR_01400W_A			1260.62	0.85	0.26	3.26	0.00111	0.03
C2_02030W_A			1515.84	0.85	0.21	3.99	6.58e-05	0
C3_04090W_A			1462.55	0.84	0.24	3.53	0.000413	0.01
C1_04620W_A			240.71	0.83	0.33	2.52	0.0117	0.19
C4_02940W_A			737.03	0.83	0.27	3.02	0.00255	0.06
CR_06700C_A			367.97	0.83	0.31	2.68	0.00743	0.14
C3_07270C_A			2280.72	0.82	0.23	3.63	0.000284	0.01
C1_02530C_A			182.14	0.82	0.34	2.42	0.0156	0.23
C1_00500C_A			454.19	0.82	0.27	3	0.00274	0.06
C5_00930C_A			279.97	0.82	0.37	2.2	0.0279	0.33
C1_10270C_A			168.11	0.82	0.35	2.36	0.0184	0.26
CR_02530W_A			1160.67	0.81	0.22	3.79	0.000153	0.01
C5_00880C_A			305.32	0.81	0.32	2.53	0.0114	0.19
C6_03270C_A			138.46	0.8	0.37	2.19	0.0282	0.33
C1_10820C_A			262.2	0.8	0.34	2.33	0.0198	0.26
CR_00910W_A			1266.09	0.8	0.26	3.08	0.00209	0.05
C4_06210C_A			570.05	0.79	0.24	3.24	0.00119	0.03
C2_02990C_A			228.3	0.79	0.31	2.57	0.0102	0.17
C2_04230W_A			504.64	0.79	0.25	3.19	0.00143	0.04
CR_06750C_A			351.46	0.79	0.29	2.68	0.00742	0.14
C2_01160W_A			166.13	0.79	0.34	2.3	0.0214	0.28
CR_02190C_A			173.97	0.78	0.35	2.22	0.0262	0.32
C4_00510C_A			210.79	0.77	0.33	2.34	0.0191	0.26
C5_01230C_A			341.48	0.76	0.32	2.37	0.0177	0.25
C1_14320C_A			307.85	0.76	0.28	2.7	0.00702	0.13
C3_06370C_A			261.93	0.76	0.33	2.3	0.0214	0.28
C2_07400C_A			607.17	0.76	0.27	2.84	0.00445	0.09
C2_02370C_A			1415.13	0.75	0.21	3.56	0.000368	0.01
CR_08060C_A			191.79	0.75	0.33	2.25	0.0243	0.31
C1_00210C_A			719.18	0.75	0.26	2.83	0.00472	0.1
C2_06820C_A			343.78	0.74	0.27	2.72	0.00646	0.12
C1_10400C_A			286.92	0.72	0.29	2.48	0.013	0.21
C1_14460W_A			485.39	0.72	0.27	2.72	0.00662	0.13
C2_03360W_A			455.09	0.72	0.26	2.81	0.0049	0.1
CR_02430C_A			413.44	0.72	0.26	2.76	0.00578	0.11
C7_04020C_A			362.95	0.71	0.28	2.56	0.0106	0.18
C3_01810C_A			1739.08	0.71	0.25	2.81	0.00497	0.1
CR_06080W_A			520.98	0.71	0.25	2.83	0.0047	0.1
C1_05240C_A			567.44	0.7	0.24	2.93	0.00334	0.07
C2_02020W_A			316.84	0.69	0.31	2.2	0.0278	0.33
CR_06340C_A			5159.89	0.69	0.22	3.07	0.00215	0.05
C7_03390C_A			247.63	0.68	0.31	2.25	0.0247	0.31
C2_05460W_A			16943.2	0.68	0.28	2.38	0.0171	0.25
C4_05320W_A			613.76	0.66	0.26	2.53	0.0115	0.19
C2_10670W_A			432.41	0.65	0.25	2.54	0.0109	0.18
C6_00750C_A			12559.3	0.65	0.27	2.37	0.0179	0.25
C3_03410C_A			804.3	0.63	0.27	2.36	0.0181	0.25
C6_01110W_A			1488.6	0.63	0.21	3.02	0.0025	0.06
C1_14280C_A			1065.6	0.62	0.23	2.72	0.00643	0.12
C3_05150W_A			387.95	0.62	0.26	2.35	0.0187	0.26
C4_06870W_A			556.83	0.61	0.24	2.5	0.0123	0.2
C5_05320C_A			1364.82	0.61	0.21	2.9	0.00369	0.08
C1_02620C_A			1175.15	0.61	0.21	2.87	0.0041	0.09
C1_08980C_A			776.05	0.61	0.25	2.45	0.0143	0.22
C2_04570W_A			491.79	0.59	0.26	2.27	0.0234	0.3
C2_02830C_A			607.31	0.58	0.24	2.4	0.0162	0.24
C3_06870W_A			43931.2	0.57	0.24	2.36	0.0182	0.25
C7_01550W_A			739.92	0.52	0.24	2.21	0.0273	0.33
C1_02820W_A			872.65	0.52	0.22	2.33	0.0197	0.26
C1_10790W_A			2063.55	0.5	0.21	2.34	0.0193	0.26
C4_00140C_A			1537.44	0.47	0.21	2.26	0.024	0.3
C2_01610C_A			4096.48	-0.43	0.19	-2.23	0.0259	0.32
C3_04670C_A			3827.72	-0.43	0.2	-2.21	0.027	0.33
C7_00960W_A			4475.66	-0.44	0.2	-2.22	0.0264	0.32
C2_08040C_A			3608.7	-0.46	0.19	-2.36	0.0185	0.26
C2_04600C_A			3609.7	-0.46	0.2	-2.26	0.0236	0.3
C4_01700C_A			1816.82	-0.46	0.2	-2.25	0.0247	0.31
C2_00210W_A			2264.49	-0.47	0.2	-2.29	0.0218	0.28
CR_04100C_A			5915.08	-0.48	0.19	-2.45	0.0142	0.22
C1_03110W_A			3954.22	-0.48	0.2	-2.38	0.0175	0.25
C2_03810C_A			4802.1	-0.48	0.19	-2.46	0.0138	0.21
C7_01790C_A			6861.05	-0.48	0.19	-2.48	0.013	0.21
C4_06610C_A			1579.24	-0.49	0.22	-2.26	0.024	0.3
C1_03030W_A			4325.06	-0.49	0.2	-2.5	0.0124	0.2
C5_01540W_A			4663.57	-0.5	0.19	-2.66	0.00779	0.14
C1_00590W_A			1593.56	-0.51	0.21	-2.43	0.0153	0.23
C3_04960W_A			4043.87	-0.51	0.2	-2.55	0.0108	0.18
C1_11360W_A			3588.75	-0.53	0.19	-2.73	0.00626	0.12
C4_06120W_A			1472.71	-0.53	0.24	-2.18	0.0292	0.34
CR_07630C_A			3057.6	-0.54	0.2	-2.63	0.00863	0.15
CR_10620C_A			589.19	-0.56	0.24	-2.32	0.0202	0.27
C3_07640C_A			455.42	-0.56	0.26	-2.18	0.029	0.34
C5_02890W_A			1184.51	-0.56	0.24	-2.38	0.0171	0.25
C1_07600W_A			713.35	-0.56	0.23	-2.4	0.0163	0.24
C3_01490W_A			3542.11	-0.58	0.21	-2.72	0.00657	0.12
C1_06470W_A			1694.48	-0.59	0.2	-2.89	0.00391	0.09
C1_10470W_A			370.13	-0.59	0.27	-2.2	0.0281	0.33
C1_03390W_A			556.51	-0.59	0.25	-2.39	0.017	0.25
CR_08150W_A			3584.78	-0.59	0.19	-3.04	0.00237	0.05
C2_00610C_A			387.72	-0.59	0.26	-2.24	0.0254	0.32
C5_00270W_A			635.32	-0.6	0.25	-2.42	0.0157	0.23
C3_06300W_A			382.15	-0.6	0.26	-2.28	0.0226	0.29
C3_00880W_A			801.77	-0.61	0.23	-2.6	0.00944	0.16
CR_06140W_A			403.35	-0.61	0.26	-2.34	0.0195	0.26
C6_03400C_A			745.18	-0.63	0.23	-2.78	0.00544	0.11
C1_04970W_A			741.31	-0.64	0.23	-2.74	0.00618	0.12
C6_02980C_A			362.94	-0.64	0.27	-2.35	0.0188	0.26
C4_04160W_A			415.28	-0.64	0.27	-2.38	0.0174	0.25
C7_00730W_A			551.57	-0.66	0.24	-2.71	0.00672	0.13
C3_02400C_A			604.31	-0.66	0.24	-2.72	0.00646	0.12
C5_01650C_A			358.66	-0.66	0.27	-2.44	0.0147	0.22
C1_10390C_A			5300.83	-0.67	0.19	-3.45	0.000566	0.02
C1_05720W_A			4153.85	-0.67	0.2	-3.43	0.000598	0.02
C1_10010C_A			291.32	-0.67	0.28	-2.36	0.0181	0.25
C4_04900W_A			2211.03	-0.68	0.21	-3.28	0.00104	0.03
C3_04150W_A			768.25	-0.69	0.23	-3.05	0.00229	0.05
C5_01050C_A			304.38	-0.7	0.28	-2.45	0.0142	0.22
C7_01600W_A			313.6	-0.7	0.29	-2.44	0.0148	0.23
CR_01910C_A			273.93	-0.7	0.3	-2.35	0.0186	0.26
C4_01050C_A			1817.73	-0.71	0.2	-3.47	0.000512	0.02
C4_03940C_A			2011.43	-0.72	0.3	-2.45	0.0143	0.22
CR_08210C_A			3123.7	-0.73	0.21	-3.39	0.000706	0.02
C1_13940W_A			1211.24	-0.73	0.22	-3.28	0.00105	0.03
C7_00950W_A			190.46	-0.75	0.33	-2.3	0.0216	0.28
C5_04530W_A			290.88	-0.75	0.3	-2.51	0.012	0.19
C1_01700W_A			302.74	-0.76	0.28	-2.68	0.00726	0.13
C1_06810W_A			286.93	-0.77	0.3	-2.57	0.0103	0.17
CR_03400W_A			200.91	-0.77	0.33	-2.32	0.0202	0.27
C1_09080C_A			448.84	-0.78	0.27	-2.86	0.00417	0.09
C1_10840C_A			329.29	-0.78	0.32	-2.43	0.0153	0.23
C1_08370W_A			343.96	-0.79	0.3	-2.62	0.00869	0.15
CR_07390C_A			318.43	-0.79	0.29	-2.67	0.00749	0.14
C1_03300C_A			183.14	-0.79	0.34	-2.35	0.0188	0.26
C6_00480C_A			725.96	-0.79	0.25	-3.2	0.00138	0.03
C4_06540W_A			150.18	-0.81	0.36	-2.23	0.0259	0.32
C2_03500W_A			162.14	-0.83	0.34	-2.4	0.0163	0.24
C3_01960C_A			235.47	-0.83	0.3	-2.73	0.00635	0.12
C1_13840W_A			170.3	-0.83	0.38	-2.21	0.027	0.33
C1_07900W_A			388.7	-0.84	0.31	-2.72	0.00657	0.12
C6_02940C_A			132.49	-0.87	0.38	-2.28	0.0229	0.29
C2_05710C_A			4078.53	-0.87	0.22	-4.03	5.67e-05	0
C1_10450W_A			485.19	-0.89	0.25	-3.51	0.000454	0.01
C1_07690C_A			260.01	-0.89	0.31	-2.81	0.00489	0.1
C1_13130C_A			257	-0.9	0.33	-2.69	0.00712	0.13
C1_05070C_A			114.66	-0.91	0.42	-2.18	0.029	0.34
CR_00360C_A			364.73	-0.91	0.28	-3.32	0.0009	0.02
C6_00620W_A			130.36	-0.92	0.37	-2.48	0.0131	0.21
C3_05320W_A			195.14	-0.92	0.34	-2.7	0.00697	0.13
C2_05930W_A			515.26	-0.96	0.25	-3.89	9.82e-05	0
C3_01170W_A			161.2	-0.96	0.4	-2.42	0.0156	0.23
C3_00720W_A			2140.56	-0.96	0.2	-4.7	2.61e-06	0
C2_06570C_A			145.66	-0.97	0.38	-2.55	0.0107	0.18
C7_02680W_A			427.38	-0.98	0.26	-3.81	0.000137	0.01
C1_04950C_A			187.08	-0.99	0.33	-3.03	0.00241	0.06
CR_07830C_A			131	-1.01	0.42	-2.38	0.0171	0.25
C5_00640C_A			147.61	-1.02	0.37	-2.73	0.00638	0.12
C6_01430C_A			88.83	-1.02	0.46	-2.22	0.0267	0.33
C3_01450C_A			167.77	-1.02	0.37	-2.75	0.00602	0.12
C4_00160C_A			483.15	-1.02	0.29	-3.53	0.000423	0.01
C1_12830C_A			110.33	-1.03	0.4	-2.58	0.00999	0.17
C7_03630C_A			132.12	-1.03	0.42	-2.48	0.013	0.21
C7_02120C_A			121.69	-1.04	0.43	-2.42	0.0154	0.23
C3_03800W_A			732.57	-1.05	0.38	-2.77	0.00555	0.11
C5_01680C_A			117.63	-1.06	0.46	-2.33	0.02	0.27
C1_09690W_A			233.11	-1.08	0.32	-3.34	0.000848	0.02
C1_14130W_A			1165.77	-1.1	0.24	-4.5	6.85e-06	0
C2_10560C_A			340.61	-1.1	0.41	-2.71	0.00671	0.13
C5_00010W_A			83.34	-1.11	0.5	-2.22	0.0263	0.32
C4_03960W_A			117.07	-1.12	0.4	-2.77	0.00554	0.11
C4_04050C_A			296.2	-1.13	0.43	-2.63	0.0086	0.15
C7_04230W_A			675.59	-1.14	0.24	-4.84	1.27e-06	0
C2_01740C_A			180.43	-1.15	0.35	-3.33	0.000855	0.02
C3_02810C_A			167.56	-1.17	0.36	-3.27	0.00107	0.03
CR_00600C_A			77.47	-1.17	0.51	-2.29	0.022	0.29
CR_02500W_A			60.41	-1.18	0.52	-2.29	0.0222	0.29
CR_03270W_A			1909.04	-1.18	0.21	-5.51	3.65e-08	0
C4_01300W_A			299.34	-1.18	0.29	-4.07	4.64e-05	0
C2_07900W_A			165.48	-1.19	0.35	-3.39	0.000691	0.02
C4_02690W_A			70.92	-1.21	0.5	-2.41	0.0161	0.24
C2_04260W_A			56.7	-1.22	0.54	-2.26	0.0238	0.3
C1_04450C_A			352.1	-1.22	0.29	-4.24	2.26e-05	0
C2_03520C_A			296.79	-1.25	0.36	-3.52	0.000432	0.01
C1_02180W_A			80.85	-1.28	0.51	-2.52	0.0116	0.19
C4_00960W_A			115.46	-1.28	0.44	-2.9	0.00376	0.08
C3_00810C_A			149.11	-1.3	0.38	-3.39	0.000691	0.02
C4_02300W_A			105.16	-1.3	0.48	-2.71	0.00679	0.13
C1_05160C_A			71.58	-1.32	0.49	-2.71	0.00669	0.13
CR_03470W_A			84.5	-1.32	0.47	-2.79	0.00522	0.11
C7_02040C_A			535.9	-1.33	0.26	-5.16	2.43e-07	0
C3_06160C_A			86.05	-1.34	0.46	-2.89	0.00391	0.09
C5_03990W_A			64.32	-1.35	0.62	-2.19	0.0286	0.34
C4_02390W_A			3114.77	-1.35	0.2	-6.77	1.33e-11	0
C1_08760W_A			46.66	-1.36	0.58	-2.32	0.0205	0.27
C7_03710C_A			64.74	-1.36	0.55	-2.49	0.0128	0.2
C5_00690C_A			43.05	-1.36	0.6	-2.27	0.023	0.3
C5_02940C_A			416.68	-1.37	0.26	-5.23	1.71e-07	0
C4_02020W_A			186.3	-1.38	0.33	-4.15	3.38e-05	0
C3_02630C_A			51.5	-1.38	0.63	-2.21	0.0272	0.33
C2_06240W_A			56.4	-1.39	0.54	-2.56	0.0105	0.18
C5_00390C_A			58.1	-1.39	0.63	-2.2	0.0278	0.33
C2_02970C_A			1846.94	-1.42	0.22	-6.39	1.69e-10	0
C5_04130C_A			2033.45	-1.44	0.26	-5.56	2.69e-08	0
C1_06410W_A			39.68	-1.46	0.65	-2.24	0.025	0.31
C1_08610C_A			510.01	-1.48	0.25	-5.86	4.76e-09	0
C5_01100C_A			129.09	-1.48	0.42	-3.49	0.000475	0.01
C1_02120C_A			1547.57	-1.48	0.25	-6.03	1.67e-09	0
C1_04700C_A			37.52	-1.49	0.66	-2.25	0.0246	0.31
C5_01400W_A			50.97	-1.53	0.67	-2.29	0.0221	0.29
CR_01920W_A			323.78	-1.55	0.28	-5.54	3.09e-08	0
CR_01990C_A			66.82	-1.58	0.53	-3	0.00274	0.06
C3_07280C_A			214.53	-1.6	0.35	-4.54	5.56e-06	0
C2_08870C_A			351.9	-1.62	0.35	-4.67	3.05e-06	0
C6_03370W_A			239.22	-1.7	0.33	-5.12	3.11e-07	0
C1_13140C_A			2097.95	-1.74	0.31	-5.54	3.03e-08	0
C3_06180C_A			1154.19	-1.76	0.23	-7.74	9.91e-15	0
C6_01780C_A			84.78	-1.78	0.53	-3.35	0.000823	0.02
C2_01010W_A			249.15	-1.85	0.34	-5.51	3.65e-08	0
C6_00490W_A			46.43	-1.88	0.77	-2.44	0.0147	0.22
C7_01290W_A			30.22	-1.9	0.74	-2.56	0.0104	0.17
C1_10360C_A			230.81	-1.91	0.32	-5.94	2.81e-09	0
C1_09210C_A			248.58	-1.92	0.31	-6.12	9.5e-10	0
C1_08570C_A			37.31	-1.94	0.68	-2.83	0.00463	0.1
C7_00310C_A			62.47	-1.94	0.54	-3.59	0.000331	0.01
C2_01270W_A			229.13	-2.05	0.32	-6.34	2.25e-10	0
C5_03440W_A			150.37	-2.07	0.38	-5.4	6.64e-08	0
C1_04590W_A			229.91	-2.11	0.38	-5.52	3.41e-08	0
CR_07840C_A			39.09	-2.13	0.64	-3.32	0.000908	0.02
C1_04460C_A			17.51	-2.18	0.96	-2.27	0.0232	0.3
C3_06850W_A			194.94	-2.22	0.34	-6.51	7.28e-11	0
C2_08590W_A			3867.54	-2.23	0.27	-8.15	3.73e-16	0
C6_03790C_A			46.36	-2.23	0.64	-3.48	0.000509	0.02
C5_04540C_A			15.83	-2.33	1	-2.34	0.0192	0.26
C2_00540W_A			29.41	-2.33	1.01	-2.32	0.0206	0.27
C4_02680C_A			18.22	-2.34	0.96	-2.43	0.0153	0.23
C3_02640C_A			113.65	-2.35	0.41	-5.7	1.2e-08	0
C5_03510C_A			116.81	-2.42	0.43	-5.62	1.91e-08	0
C6_01670W_A			232.46	-2.45	0.37	-6.59	4.5e-11	0
C1_08790W_A			259.91	-2.49	0.96	-2.59	0.0095	0.17
C2_03220C_A			215.44	-2.5	0.49	-5.16	2.48e-07	0
C2_08950W_A			13.16	-2.53	1.11	-2.29	0.0223	0.29
CR_01900C_A			438.35	-2.59	0.32	-8.12	4.54e-16	0
C1_11520C_A			79.19	-2.78	0.51	-5.48	4.21e-08	0
C6_03250W_A			110	-2.81	0.53	-5.33	9.62e-08	0
C4_05360C_A			24.96	-3.3	1.06	-3.11	0.00186	0.04
C5_01360W_A			73.3	-3.48	0.59	-5.94	2.93e-09	0
C5_04490C_A			90.96	-3.63	0.5	-7.33	2.24e-13	0
C6_01360W_A			63.95	-3.86	0.6	-6.38	1.81e-10	0
C2_10070W_A			21.38	-4.62	1.13	-4.1	4.12e-05	0
C6_00470C_A			159.74	-4.67	0.45	-10.32	5.58e-25	0
C5_03130W_A			68.17	-5.15	1.59	-3.24	0.00118	0.03
C1_11530C_A			3.62	-5.37	2.44	-2.2	0.0281	0.33
C7_02290W_A			3.82	-5.45	2.43	-2.24	0.0251	0.31
C3_00220W_A			3.95	-5.49	2.41	-2.27	0.0229	0.29
C6_04230W_A			4.55	-5.7	2.34	-2.43	0.015	0.23
C1_09150W_A			7.21	-6.36	2.01	-3.16	0.00158	0.04
C4_04630C_A			7.25	-6.37	2.01	-3.17	0.00153	0.04
C1_11320C_A			27.89	-8.31	1.61	-5.15	2.64e-07	0
C4_00910C_A			43.03	-8.94	1.56	-5.73	1.03e-08	0

## Sheet: RNAseq  FC>1.5 padj<0.05 
Feature	Orf	Gene	baseMean	log2FoldChange	lfcSE	stat	pvalue	padj
C5_04930C_A	orf19.3981	MAL31	97.8	10	1.5	6.66	2.76439e-11	3.28793e-09	Upregulated
C1_13100W_A	orf19.4936.1		53.05	9.13	1.58	5.77	7.69689e-09	6.31795e-07	Upregulated
C1_01980W_A	orf19.4527	HGT1	49.46	9.03	1.56	5.79	7.02232e-09	5.84658e-07	Upregulated
C4_03470C_A	orf19.3374	ECE1	548.91	9.02	1.2	7.49	6.87197e-14	1.17794e-11	Upregulated
C6_01070C_A	orf19.113	CIP1	703.41	8.55	1.83	4.67	2.99514e-06	0.000157258	Upregulated
C1_00780C_A	orf19.6028	HGC1	21.12	7.8	1.69	4.61	3.99033e-06	0.000202223	Upregulated
C1_06280C_A	orf19.1822	UME6	20	7.73	1.72	4.5	6.9537e-06	0.000332182	Upregulated
C1_07670W_A	orf19.1227	ZCF4	18.83	7.63	1.69	4.52	6.28139e-06	0.000310237	Upregulated
CR_00620C_A	orf19.7469	ARG1	3574.43	7.21	0.27	26.65	1.83571e-156	1.06985e-152	Upregulated
C4_00720W_A	orf19.4170	CSP2	12.65	7.04	1.97	3.56	0.000366173	0.0120799	Upregulated
C4_03570W_A	orf19.1321	HWP1	102.11	7.03	0.97	7.26	3.95954e-13	5.91697e-11	Upregulated
C7_00110W_A	orf19.7111.1	SOD3	9.98	6.7	1.88	3.56	0.000373094	0.0120799	Upregulated
CR_01630C_A	orf19.2552	-	9.87	6.69	1.88	3.56	0.000372597	0.0120799	Upregulated
C1_05920W_A	orf19.2457	-	9.1	6.57	1.93	3.4	0.000685478	0.0198387	Upregulated
C3_02300W_A	orf19.1616	FGR23	8.84	6.52	2	3.26	0.00112519	0.028888	Upregulated
C5_03650C_A	orf19.6678	-	7.99	6.38	1.98	3.23	0.00123398	0.0312681	Upregulated
CR_07740W_A	orf19.2633.1	-	21.73	6.36	1.65	3.85	0.000117626	0.00442273	Upregulated
C6_03230W_A	orf19.5610	ARG3	731.69	5.56	0.31	17.9	1.14002e-71	9.4915e-69	Upregulated
C6_03700W_A	orf19.5741	ALS1	456.13	5.38	0.39	13.77	3.81936e-43	2.22592e-40	Upregulated
C4_01550C_A	orf19.4630	CPA1	934.25	5.26	0.27	19.62	9.56782e-86	1.11522e-82	Upregulated
C7_03570W_A	orf19.6689	ARG4	1021.8	5.11	0.26	19.77	5.7193e-87	8.33302e-84	Upregulated
CR_03790C_A	orf19.4377	KRE1	195.07	5	0.47	10.65	1.79139e-26	6.96016e-24	Upregulated
CR_10340W_A	orf19.7610	PTP3	3246.28	4.95	0.25	19.53	6.14653e-85	5.97033e-82	Upregulated
C1_05140W_A	orf19.4056	BRG1	271.36	4.82	0.39	12.44	1.5295e-35	8.10356e-33	Upregulated
C4_05070C_A	orf19.3770	ARG8	647.83	4.8	0.29	16.83	1.4905e-63	1.08583e-60	Upregulated
CR_01330W_A	orf19.3221	CPA2	2182.78	4.74	0.22	21.26	2.66412e-100	7.76325e-97	Upregulated
C1_09290C_A	orf19.4788	ARG5,6	2279.33	4.62	0.22	20.62	1.65434e-94	3.21383e-91	Upregulated
C1_11480W_A	orf19.655	PHO84	170.55	4.51	1.45	3.12	0.00181205	0.043639	Upregulated
CR_00740C_A	orf19.3282	BMT3	90.05	4.48	0.57	7.92	2.37566e-15	5.1279e-13	Upregulated
C4_04380C_A	orf19.1409.2	-	23.18	4.43	1.09	4.08	4.56492e-05	0.00188683	Upregulated
CR_07070C_A	orf19.1816	ALS3	731.7	4.42	0.27	16.63	4.05016e-62	2.6227e-59	Upregulated
C4_05900C_A	orf19.1277	-	41.97	4.29	0.86	4.98	6.49785e-07	3.6413e-05	Upregulated
C3_03690W_A	orf19.6950	-	28.41	3.88	0.88	4.41	1.04874e-05	0.000481265	Upregulated
C6_01060C_A	orf19.111	CAN2	380.47	3.87	0.36	10.61	2.66668e-26	9.142e-24	Upregulated
C4_01800W_A	orf19.4612	-	15.86	3.86	1.23	3.13	0.00173657	0.0423462	Upregulated
CR_03890W_A	orf19.467	WOR3	61.04	3.76	0.64	5.86	4.63376e-09	4.03068e-07	Upregulated
C1_13450W_A	orf19.4975	HYR1	104.31	3.62	0.51	7.06	1.67798e-12	2.44482e-10	Upregulated
C6_01990W_A	orf19.689	PLB1	37.45	3.47	0.85	4.1	4.1472e-05	0.00172642	Upregulated
C2_09460C_A	orf19.1604	RHA1	843.37	3.47	1.02	3.41	0.00064551	0.0188102	Upregulated
C5_03930C_A	orf19.3219	-	290.52	3.43	0.32	10.67	1.40696e-26	5.85697e-24	Upregulated
C4_03520C_A	orf19.1327	RBT1	31.18	3.31	0.86	3.87	0.000109806	0.00415553	Upregulated
C2_08050C_A	orf19.2179	SIT1	153.84	3.29	0.5	6.61	3.8352e-11	4.38266e-09	Upregulated
C1_09180W_A	orf19.4776	LYS143	101.36	3.27	0.48	6.81	9.86948e-12	1.27821e-09	Upregulated
C4_00450C_A	orf19.5674	PGA10	33.53	3.17	0.84	3.79	0.000152897	0.00543707	Upregulated
C1_00680W_A	orf19.6037	ASM3	118.62	3.13	0.49	6.42	1.33028e-10	1.43572e-08	Upregulated
C7_02150C_A	orf19.6500	ECM42	338.99	3.1	0.4	7.76	8.29711e-15	1.55986e-12	Upregulated
C1_02590C_A	C1_02590C_A	SNZ1	1135.58	3.05	0.25	12.28	1.16162e-34	5.6416e-32	Upregulated
CR_02490W_A	orf19.176	OPT4	45.23	3.04	0.7	4.34	1.45573e-05	0.000647635	Upregulated
C3_04530C_A	orf19.5908	TEC1	691.74	3.02	0.26	11.56	6.93988e-31	3.1112e-28	Upregulated
C7_00660W_A	orf19.7053	GAC1	218.54	3.01	0.36	8.46	2.70071e-17	7.15443e-15	Upregulated
C3_00360W_A	orf19.5431	-	184.37	2.99	0.44	6.79	1.12266e-11	1.42236e-09	Upregulated
C4_02030W_A	orf19.4590	RFX2	88.43	2.97	0.52	5.67	1.41777e-08	1.1017e-06	Upregulated
C6_03850C_A	orf19.5760	IHD1	275.73	2.93	0.35	8.42	3.6801e-17	9.32506e-15	Upregulated
C1_01930W_A	orf19.4530.1	-	158	2.86	0.54	5.31	1.07518e-07	6.81103e-06	Upregulated
C1_04900W_A	orf19.753	MNN15	317.74	2.76	0.34	8.22	2.07773e-16	5.04541e-14	Upregulated
C1_13160W_A	orf19.4943	PSA2	41.95	2.66	0.67	3.99	6.47266e-05	0.00254883	Upregulated
C6_03320W_A	orf19.5620	-	822.55	2.6	0.26	9.91	3.74974e-23	1.15018e-20	Upregulated
C1_04020C_A	orf19.4477	CSH1	198.73	2.58	0.35	7.32	2.46309e-13	3.98746e-11	Upregulated
C6_02450W_A	orf19.5514	-	31.64	2.53	0.74	3.43	0.000600608	0.0176785	Upregulated
C7_00430W_A	orf19.7077	-	68.96	2.5	0.56	4.51	6.52241e-06	0.000319434	Upregulated
C3_02610C_A	orf19.251	GLX3	271.13	2.46	0.36	6.76	1.42259e-11	1.72726e-09	Upregulated
C4_01380W_A	orf19.4649	ZCF27	401.18	2.45	0.31	7.81	5.93462e-15	1.19265e-12	Upregulated
C4_02990C_A	orf19.2693	GST2	120.28	2.45	0.41	6.04	1.56186e-09	1.44485e-07	Upregulated
C3_07180C_A	orf19.6782	BMT1	479.03	2.44	0.28	8.67	4.43713e-18	1.29298e-15	Upregulated
CR_06790C_A	orf19.1855	-	103.23	2.41	0.45	5.38	7.3708e-08	4.82664e-06	Upregulated
C4_02360W_A	orf19.2768	AMS1	115.88	2.41	0.47	5.13	2.96575e-07	1.76371e-05	Upregulated
CR_07810W_A	orf19.3710	YHB5	73.85	2.39	0.61	3.9	9.80534e-05	0.00376539	Upregulated
C7_03480W_A	orf19.6705	-	436.21	2.38	0.28	8.59	8.99701e-18	2.49688e-15	Upregulated
C1_10300W_A	orf19.4900	MNN12	210.47	2.35	0.34	6.91	4.71682e-12	6.39293e-10	Upregulated
C3_01800C_A	orf19.1666	-	247.76	2.34	0.35	6.61	3.71624e-11	4.33165e-09	Upregulated
C6_00840W_A	orf19.85	GPX2	1321.54	2.33	0.22	10.63	2.22787e-26	8.11503e-24	Upregulated
CR_06660W_A	orf19.700	SEO1	538	2.33	0.3	7.9	2.73619e-15	5.69519e-13	Upregulated
C2_03750W_A	orf19.847	YIM1	364.66	2.33	0.32	7.26	3.78926e-13	5.81153e-11	Upregulated
C3_05610W_A	orf19.6996	MNN14	52.77	2.25	0.64	3.52	0.000425662	0.0134824	Upregulated
C2_01300C_A	orf19.1995	MNN24	345.27	2.24	0.32	6.9	5.08122e-12	6.7303e-10	Upregulated
CR_09880W_A	orf19.7561	DEF1	1106.7	2.24	0.35	6.41	1.47039e-10	1.55807e-08	Upregulated
C2_06630C_A	orf19.36.1		46.52	2.21	0.62	3.58	0.000346226	0.0115419	Upregulated
C5_04830W_A	orf19.3969	SFL2	154.57	2.16	0.38	5.62	1.86221e-08	1.42802e-06	Upregulated
C4_05730W_A	orf19.1258	-	364.59	2.11	0.29	7.28	3.23316e-13	5.09266e-11	Upregulated
C1_00120C_A	orf19.6096	TRP1	111.48	2.09	0.47	4.42	9.9529e-06	0.000464044	Upregulated
C1_08170C_A	orf19.5094	BUL1	132.4	2.04	0.38	5.33	9.60431e-08	6.16194e-06	Upregulated
C7_01390W_A	orf19.6920	-	46.17	1.99	0.6	3.33	0.000875931	0.0240798	Upregulated
C5_02860C_A	orf19.4309	GRP2	425.55	1.96	0.35	5.54	3.0893e-08	2.22277e-06	Upregulated
C3_06000W_A	orf19.7381	AHR1	281.96	1.94	0.31	6.23	4.65457e-10	4.52114e-08	Upregulated
C1_02630C_A	orf19.2952	EXG2	50.4	1.93	0.62	3.14	0.00170639	0.041785	Upregulated
C4_04770C_A	orf19.3803	MNN22	761.76	1.89	0.24	7.77	7.62515e-15	1.48131e-12	Upregulated
C1_00290W_A	orf19.6078	POL93	51.38	1.89	0.61	3.09	0.00200693	0.0475462	Upregulated
C1_08900W_A	orf19.4749	-	141.53	1.88	0.37	5.06	4.12947e-07	2.38283e-05	Upregulated
C6_00790C_A	orf19.3646	CTR1	276.06	1.86	0.42	4.4	1.09401e-05	0.000498118	Upregulated
C5_03740W_A	orf19.1121	-	96.61	1.84	0.46	4.02	5.72179e-05	0.00231574	Upregulated
C1_00350C_A	orf19.6073	HMX1	178.73	1.8	0.47	3.82	0.000135093	0.00501478	Upregulated
C2_09220W_A	orf19.4082	DDR48	164.45	1.79	0.49	3.65	0.000258974	0.00893077	Upregulated
CR_09530C_A	orf19.6608	-	200.9	1.76	0.36	4.95	7.35446e-07	4.08208e-05	Upregulated
C4_02340W_A	orf19.2769	-	173.8	1.71	0.35	4.83	1.38762e-06	7.48804e-05	Upregulated
CR_10640W_A	orf19.7648	-	117.69	1.71	0.4	4.28	1.85035e-05	0.000810816	Upregulated
C2_06890C_A	orf19.2244	-	72.87	1.7	0.51	3.33	0.000859481	0.0238259	Upregulated
C4_06480C_A	orf19.2886	CEK1	95.39	1.68	0.5	3.36	0.000783028	0.0222609	Upregulated
C7_01680C_A	orf19.6556	-	87.15	1.66	0.53	3.15	0.00161354	0.0396782	Upregulated
C3_04660C_A	orf19.5926	ARG11	63.24	1.66	0.53	3.11	0.00184598	0.044273	Upregulated
CR_00290W_A	orf19.7504	-	235.13	1.62	0.37	4.38	1.1817e-05	0.000529763	Upregulated
C1_08940C_A	orf19.4752	MSN4	408.31	1.59	0.3	5.3	1.1797e-07	7.39281e-06	Upregulated
CR_10840C_A	orf19.7676	XYL2	587.22	1.59	0.4	3.98	7.00155e-05	0.00272033	Upregulated
C1_13620W_A	orf19.4998	ROB1	2520.92	1.56	0.2	7.72	1.12124e-14	1.98017e-12	Upregulated
C3_07360W_A	orf19.6755	DLD2	259.54	1.55	0.32	4.84	1.28086e-06	6.97653e-05	Upregulated
C2_08920W_A	orf19.215	-	152.15	1.55	0.39	4.01	5.96869e-05	0.002399	Upregulated
C3_06470W_A	orf19.7436	AAF1	112.05	1.52	0.4	3.79	0.000149086	0.0053634	Upregulated

## Sheet:  Chipchip >1.5log of ratio
ID	orf19 no.	P-Values (Down)	q-Values (Down)	RP-Values (Down)	P-Values (up)	q-Values (up)	RP-Values (up)	Mean	Standard deviation
CalR11130C	orf19.1806	0.0156529	0.937231	681.209	0.923879	1.0039	11558.9	NaN	NaN
Cal403030W	orf19.4651	0.983709	1.00792	13162.7	9.10973e-05	0.44	50.3389	8.2395	10.3641
Cal124590W	orf19.1836	0.722384	1.00272	8631.12	0.156462	1.02772	2757.86	7.7235	11.0938
Cal108970W	orf19.4475	0.83618	1.00292	10100.2	0.120709	1.0175	2333.77	6.063	NaN
Cal605080C	orf19.3469	0.998614	1.00228	14110.7	0.000283644	0.51375	81.719	5.9	NaN
Cal305490C	orf19.1611:orf19.1610	0.999786	1.00068	14344.4	0.000102139	0.37	53.1037	5.799	NaN
Cal313460W	snR44d	0.999756	1.00086	14332.6	1.0352e-05	0.075	17.72	5.7445	3.68756
CalR14670C	orf19.693	0.689048	0.99983	8246.93	0.0756756	1.00049	1741.9	5.44	NaN
Cal705790C	orf19.3699	0.999344	1.00142	14229.4	0.000326432	0.473	86.9483	4.794	NaN
Cal703610W	orf19.6556	0.999545	1.0012	14270.6	0.000347826	0.336	89.2244	4.376	NaN
CalR00780C	orf19.7504	0.999301	1.00151	14221.4	0.000495514	0.312174	106.236	4.302	NaN
CalR14640W	orf19.915	0.00127536	0.7392	170.106	0.0117115	0.767873	577.275	4.236	NaN
Cal703210W	orf19.6579	0.999529	1.00133	14267.1	0.000458247	0.349474	102.47	4.232	NaN
Cal122820C	orf19.4865	0.99762	1.00295	13991.2	0.00110559	0.4005	157.823	4.223	NaN
CalR12830W	orf19.6639	0.0197453	0.9537	779.361	0.0143023	0.800154	647.318	4.148	NaN
Cal124440W	orf19.1830	0.998402	1.00228	14084.6	0.00102415	0.390526	152.283	4.1405	0.111016
Cal704720W	snR8c	0.790806	1.00147	9475.67	0.000742581	0.371034	128.794	4.01	5.26936
Cal101780W	orf19.6023	0.997112	1.00362	13942.3	0.00151139	0.45625	185.79	3.96	NaN
Cal125720C	snR64	0.995966	1.00421	13840.2	0.000396825	0.359375	94.1382	3.949	3.24986
Cal607650W	orf19.5701	0.999987	0.999987	14449.4	6.21118e-06	0.09	12.7279	3.909	1.13137
Cal208320W	orf19.851	0.9942	1.00432	13710.3	0.00225328	0.44726	231.37	3.888	NaN
Cal114930C	orf19.6249	0.996545	1.00382	13888.5	0.00191235	0.461833	211.225	3.791	NaN
Cal203770W	orf19.1486	0.991137	1.00614	13515.7	0.000674948	0.349286	122.572	3.6435	3.20814
Cal310850W	orf19.5940	0.99982	1.00065	14355.2	0.000458247	0.349474	102.606	3.639	NaN
Cal701790W	orf19.7033	0.42828	0.998354	5552.52	0.00162802	0.481429	192.585	3.5865	5.70282
Cal303510W	orf19.1693	0.942297	1.00849	11950.2	0.00122636	0.403864	166.709	3.5505	3.87707
Cal221690W	orf19.1389	0.994359	1.00434	13721.2	0.0031608	0.503297	277.314	3.46	NaN
CalR03300W	orf19.2529.1	0.999226	1.00158	14207.2	0.0012167	0.41	165.952	3.456	NaN
CalR06920C	orf19.2419	0.990754	1.00631	13493.9	0.00094824	0.381667	145.176	3.393	2.87085
Cal105840W	orf19.2951	0.824758	1.00283	9938.22	0.124429	1.01633	2379.82	3.36	NaN
Cal401680C	orf19.4163	0.999826	1.00059	14356.3	0.000556936	0.3228	112.641	3.358	NaN
Cal118140W	orf19.5070	0.831596	1.00256	10035.4	0.122617	1.01527	2358.04	3.316	NaN
Cal113500W	orf19.2446,orf19.2445	0.829355	1.00278	10003.2	0.131424	1.01348	2464.84	3.206	NaN
Cal302200W	orf19.2501	0.444052	0.997878	5707.69	0.195606	1.03179	3194.32	3.173	5.37684
Cal223440W	orf19.1742	0.972114	1.00844	12739.5	0.00171912	0.461296	198.454	3.142	2.97126
CalR13640W	orf19.3863	0.00895514	0.933525	494.996	0.0335148	0.911126	1062.53	3.135	NaN
Cal216580W	orf19.1893	0.587366	0.99835	7148.89	0.00230297	0.439079	234.126	3.0795	4.5573
Cal203610W	orf19.1479	0.996262	1.00395	13865.7	0.0127598	0.770375	606.341	3.0335	1.58745
Cal122990C	orf19.4872	0.997277	1.00344	13957.6	0.00343133	0.528936	289.9	3.027	NaN
Cal305550W	orf19.1608	0.99512	1.00434	13775.3	0.0107798	0.758252	550.91	3.003	NaN
Cal401160W	orf19.4189	0.999778	1.00075	14341.4	0.000859903	0.389375	138	2.999	NaN
Cal114410W	orf19.6272	0.997727	1.00264	14002.8	0.00405452	0.549065	317.666	2.988	0.308299
Cal113450C	orf19.2447	0.997865	1.00264	14020.4	0.00252588	0.446341	245.357	2.9295	0.423557
Cal113310W	orf19.2455	0.996517	1.00386	13886	0.00425397	0.555315	325.906	2.929	NaN
Cal603150C	orf19.3439	0.946504	1.00896	12048.1	0.00245135	0.44962	240.925	2.924	2.95288
Cal501490W	orf19.921	0.993647	1.00453	13672.5	0.00144721	0.45587	181.692	2.9135	2.04
CalR02890W	orf19.3228	0.999828	1.00052	14357.8	0.000463078	0.305	103.116	2.88	0.970151
Cal123480W	orf19.4892	0.997995	1.00263	14036.1	0.00374465	0.531961	304.158	2.8615	0.123744
CalR05960W	orf19.2825	0.999056	1.00189	14178	0.00228778	0.442	233.217	2.858	NaN
Cal109610C	orf19.1063	0.986413	1.00769	13279.7	0.00171222	0.477115	198.038	2.831	2.23163
CalR02800C	orf19.3231	0.99962	1.00107	14291.5	0.00171014	0.485882	197.864	2.824	0.367696
Cal121850C	orf19.4821	0.996552	1.00376	13888.9	0.0116342	0.766273	574.957	2.817	1.1738
Cal123740W	orf19.4903	0.997267	1.0035	13956.7	0.00197585	0.447344	215.119	2.8155	1.2438
Cal113750C	orf19.2433	0.997108	1.00369	13941.8	0.00771843	0.69037	455.538	2.812	0.666095
CalR05880C	orf19.2822	0.999741	1.00091	14327.1	0.00063285	0.33963	118.642	2.8105	1.00338
Cal501200W	orf19.935	0.971707	1.00867	12727	0.00222912	0.448611	229.817	2.796	2.48902
Cal101650W	orf19.6029	0.996618	1.00368	13895.4	0.00524431	0.593672	366.257	2.722	NaN
CalR21090W	tD(GUC)7	0.0375162	0.990182	1136.68	0.0526025	0.961173	1394.32	2.704	NaN
Cal102480W	orf19.3302	0.990283	1.00654	13469	0.00252933	0.441566	245.55	2.6975	1.90282
Cal404900W	orf19.4568	0.999892	1.00031	14386.4	0.000416149	0.354706	97.1494	2.683	NaN
Cal402130W	orf19.4698	0.999903	1.00011	14390.4	0.000342995	0.355	88.5664	2.663	NaN
Cal503520C	orf19.4153	0.998386	1.00233	14082.2	0.00403934	0.55217	316.973	2.641	NaN
Cal405960C	snR79	0.999908	1.00005	14393.3	0.000148378	0.43	61.6928	2.6325	0.0968737
Cal411300W	orf19.3777	0.994142	1.00447	13706	0.000327812	0.395833	87.264	2.615	1.99121
Cal120520C	orf19.4760	0.997469	1.00329	13975.3	0.00298275	0.491136	269.178	2.61	0.760847
Cal210900W	orf19.4128	0.664673	1.00074	7975.5	0.167206	1.02792	2880.37	2.6095	4.02697
Cal403610C	snR78	0.999891	1.00037	14383.4	0.000326432	0.473	86.741	2.58	NaN
CalR04960W	orf19.3749	0.992561	1.00547	13601.3	0.00311387	0.501333	275.363	2.5705	1.60443
Cal221410W	snR44c	0.993036	1.00497	13633.6	0.00941063	0.733118	509.627	2.565	NaN
Cal601710W	orf19.84	0.999921	0.99999	14399.9	0.000228433	0.472857	73.973	2.5625	0.156271
Cal303060W	orf19.1716	0.997578	1.00319	13986.6	0.00336853	0.530543	287.134	2.548	0.639224
Cal126170W	orf19.666:orf19.665	0.997104	1.00375	13941.6	0.00755003	0.68805	449.462	2.5425	0.241123
Cal503320W	orf19.4145	0.9999	1.00018	14389.4	0.000294686	0.474444	82.9458	2.5275	0.132229
Cal405970W	snR79	0.999842	1.00039	14362.6	0.000225673	0.545	73.2052	2.5175	0.201525
Cal131180W	orf19.4996	0.993119	1.00477	13638.9	0.010352	0.761421	538.227	2.501	NaN
Cal117600W	orf19.1233	0.974466	1.00792	12816.5	0.0527032	0.959384	1396.11	2.491	2.2288
Cal501140C	orf19.936	0.999895	1.00024	14388	0.000461698	0.318571	102.995	2.4855	0.542351
Cal129960C	orf19.4934	0.997228	1.00353	13953.1	0.00671705	0.666644	420.613	2.483	0.0240416
CalR06500C	orf19.2847	0.099686	1.00309	2067.28	0.0023913	0.444231	238.294	2.469	5.74171
Cal107770W	orf19.3048	0.997186	1.00363	13948.8	0.00843823	0.715029	478.644	2.464	0.329512
Cal203720W	orf19.1484	0.997394	1.00335	13968.2	0.00722774	0.68451	438.178	2.4565	0.143543
CalR02440C	orf19.3250	0.984994	1.00752	13218.6	0.00457833	0.571897	338.916	2.433	1.69988
Cal316870W	orf19.6780	0.999125	1.00175	14188.5	0.00369082	0.5348	301.247	2.422	0.223446
Cal405330C	orf19.2763	0.990442	1.00635	13477.5	0.000514838	0.310833	108.194	2.416	1.90919
CalR05610W	orf19.172	0.974734	1.00777	12825.8	0.00512284	0.584488	361.181	2.4135	1.89434
Cal222820W	orf19.1767	0.997589	1.00313	13987.5	0.00584403	0.622647	389.107	2.3995	0.167584
Cal709160W	orf19.7152	0.999623	1.001	14292	0.00168944	0.4896	196.726	2.3955	0.27365
Cal609460W	orf19.1078	0.998767	1.00222	14131.4	0.00443754	0.569026	333.054	2.394	NaN
Cal204760W	orf19.1535	0.993113	1.0049	13638.3	0.0116342	0.766273	574.978	2.388	NaN
Cal219360W	orf19.3615	0.997631	1.00289	13992.4	0.00506625	0.58728	358.594	2.3855	0.358503
Cal706670W	orf19.5145	0.999456	1.00146	14250.9	0.00175017	0.444912	200.823	2.383	0.651953
Cal202570W	orf19.2002	0.992226	1.00555	13580	0.00424707	0.559455	325.607	2.3815	1.35128
Cal219160W	orf19.3625	0.997061	1.00378	13937.4	0.00898965	0.719669	496.298	2.3815	0.276479
Cal305940W	orf19.242.2	0.999056	1.00189	14177.7	0.00195859	0.457742	213.846	2.3805	0.945402
Cal603470W	orf19.3430	0.998827	1.00208	14139.4	0.00209041	0.445441	222.351	2.359	1.0946
Cal508490C	orf19.1108	0.997607	1.00301	13989.7	0.0069441	0.675302	428.328	2.351	NaN
Cal701560W	orf19.7043.1	0.999141	1.0017	14192	0.0035873	0.535876	296.825	2.3485	0.0629325
Cal109080W	orf19.4479	0.993792	1.00454	13682.3	0.00450932	0.573158	335.969	2.3395	1.20703
Cal506930W	orf19.4347	0.999835	1.00046	14360	0.000775017	0.374333	130.863	2.3385	0.55225
Cal312550W	orf19.6983	0.846906	1.00341	10255.5	0.00660248	0.664375	416.298	2.3335	2.68488
Cal316780W	orf19.6783	0.955845	1.00795	12277.1	0.0063637	0.658643	407.995	2.329	2.01667
Cal405350W	orf19.2763	0.999292	1.00157	14219.7	0.000342995	0.355	88.572	2.313	0.64771
Cal204880W	orf19.1541	0.909287	1.00546	11279.3	0.00727536	0.675769	439.88	2.3025	2.3384
Cal316260C	orf19.6805	0.998253	1.0024	14066.7	0.00649896	0.667872	412.519	2.2995	0.627204
Cal602930W	orf19.3448	0.746176	1.00195	8915.02	0.0208406	0.865272	804.045	2.297	NaN
Cal504420W	orf19.3171	0.997642	1.00276	13993.6	0.00728088	0.671975	440.186	2.287	NaN
Cal408110W	tQ(UUG)1	0.985689	1.00759	13249.4	0.00566943	0.627099	382.638	2.281	1.45805
CalR02990W	orf19.3223	0.873369	1.00437	10662.6	0.00788061	0.692061	460.539	2.279	2.49184
Cal312670W	orf19.6986	0.998961	1.00193	14162.3	0.00245204	0.444125	241.015	2.277	0.821658
Cal108700W	orf19.4461	0.835011	1.00259	10083.7	0.125897	1.01743	2398.05	2.275	NaN
CalR14450W	orf19.717	0.998556	1.00229	14102.9	0.0056922	0.624849	383.488	2.271	0.451134
Cal408400W	orf19.1304	0.999655	1.00097	14299.9	0.00084403	0.394516	136.872	2.2675	0.159099
Cal703110C	orf19.6583	0.988484	1.00718	13377.4	0.00578468	0.625522	386.988	2.265	1.34209
Cal312400W	orf19.6979	0.99917	1.00166	14197	0.00350449	0.534526	293.448	2.263	NaN
Cal210480C	orf19.145	0.996308	1.00393	13869.4	0.00583713	0.626519	388.886	2.252	0.619426
Cal222870W	orf19.1766	0.991765	1.00593	13552.6	0.0264424	0.891046	924.345	2.2505	1.20137
Cal403330W	orf19.4635	0.999758	1.00079	14333	0.00110697	0.39122	157.987	2.249	0.548715
Cal307700W	orf19.333	0.999551	1.00114	14272.2	0.00173637	0.449286	199.775	2.2455	0.668216
Cal504640W	orf19.4217	0.998054	1.00255	14042.9	0.000455487	0.366667	102.235	2.2445	0.9751
Cal105570W	orf19.2939	0.933401	1.00805	11755.9	0.0080283	0.696587	465.51	2.2405	2.0895
Cal407600W	orf19.3369	0.274484	0.996061	4023.3	0.0310393	0.901323	1014.56	2.236	NaN
Cal109150C	orf19.1039	0.996426	1.00391	13878	0.00657971	0.666713	415.638	2.228	0.523259
Cal315240C	orf19.7443	0.998622	1.00215	14111.9	0.00549827	0.617597	375.948	2.2265	0.344361
Cal105070C	orf19.3686	0.979578	1.00782	12998.8	0.0067481	0.66517	421.73	2.223	1.52311
CalR02110W	orf19.3264	0.688134	0.999305	8237.08	0.00670807	0.670345	420.064	2.2225	3.06672
Cal313300W	orf19.7357	0.998783	1.00217	14133.4	0.00273775	0.461279	257.119	2.218	0.879641
Cal207300W	orf19.906	0.810533	1.00108	9740.79	0.134026	1.01784	2495.42	2.206	NaN
Cal120300W	snR190	0.996583	1.00372	13892.4	0.0110835	0.753991	559.594	2.2025	0.231224
Cal210880C	orf19.182	0.975548	1.00775	12854.1	0.0541677	0.965424	1419.57	2.187	1.7508
Cal303010W	orf19.1718	0.957744	1.00804	12328.1	0.00806004	0.695179	466.867	2.187	1.79322
Cal702930C	orf19.6920	0.99862	1.00222	14111.6	0.00304279	0.495393	272.044	2.1775	0.853478
Cal510990W	orf19.3982	0.999464	1.0014	14252.5	0.00120842	0.416905	165.336	2.175	0.230517
Cal305220W	orf19.1621	0.994162	1.00442	13707.3	0.0197667	0.857545	779.854	2.17	0.684479
CalR10760W	orf19.6312	0.99966	1.0009	14301.4	0.00142995	0.460444	180.881	2.1495	0.263751
Cal106200W	orf19.2965.1	0.996248	1.00401	13864.7	0.00921118	0.72538	503.39	2.147	0.233345
Cal607720W	orf19.5711	0.696329	1.00087	8328.83	0.00947343	0.73016	511.63	2.1435	2.93237
Cal402060W	orf19.4701	0.982839	1.00824	13125.9	0.00772533	0.686748	455.838	2.1425	1.33148
Cal403590C	snR77b	0.985947	1.00764	13260.2	0.00758385	0.686813	450.664	2.1395	1.24663
Cal501010W	orf19.942	0.868304	1.00333	10581.4	0.00971153	0.732917	519.346	2.131	2.30234
Cal214910W	orf19.81	0.987948	1.00713	13351	0.00743892	0.682215	445.354	2.1305	1.16178
Cal702770W	orf19.6910,orf19.6912	0.992749	1.00496	13614.3	0.00695238	0.6716	428.684	2.1235	0.935502
Cal406680W	orf19.2691	0.99831	1.00232	14073.7	0.00374741	0.527184	304.25	2.113	0.838629
Cal101940C	orf19.6017	0.99624	1.00407	13864.2	0.0105832	0.76675	545.203	2.111	0.0707106
Cal412130C	orf19.1795.1	0.999603	1.00112	14286.3	0.000930297	0.396471	143.496	2.11	NaN
Cal309370W	orf19.5854.1	0.999062	1.00176	14178.9	0.00382333	0.532692	307.465	2.103	0.00989945
Cal108750W	orf19.4464	0.982851	1.00803	13126.5	0.04247	0.932409	1225.04	2.1005	1.44886
Cal317050W	orf19.6769	0.998884	1.00207	14149	0.00463906	0.560167	341.789	2.0965	0.0671752
Cal110100W	orf19.6842,orf19.6843	0.994982	1.00427	13764.1	0.00882471	0.722429	490.469	2.0955	0.581949
Cal406650W	orf19.2693	0.997575	1.00325	13986.4	0.000875086	0.384242	139.499	2.091	0.869741
Cal701000W	orf19.7072	0.998954	1.002	14160.3	0.00365908	0.535556	299.76	2.084	0.606698
Cal217300W	orf19.2209	0.990326	1.00651	13471.1	0.00807522	0.692367	467.249	2.0785	0.990657
Cal131870W	orf19.5026	0.991828	1.00592	13556	0.0182374	0.857987	744.693	2.06	NaN
Cal304300W	tV(AAC)2,orf19.1662	0.993789	1.0046	13682.2	0.00876398	0.729828	488.598	2.06	0.758018
Cal301060W	orf19.5413:orf19.5412	0.949056	1.00812	12107.8	0.0106108	0.761139	546.346	2.054	1.68999
Cal505760W	orf19.4278	0.9995	1.00137	14260.7	0.00190614	0.468136	210.798	2.0525	0.1492
Cal607150C	orf19.5607	0.48107	0.998954	6073.21	0.0020283	0.438657	218.586	2.052	3.74342
Cal503630C	orf19.6294	0.999538	1.00127	14268.9	0.00195583	0.46459	213.738	2.05	0.275772
Cal130690W	orf19.4966	0.991107	1.00618	13513.7	0.00912284	0.72235	500.488	2.047	0.900854
Cal503820W	orf19.3202	0.989967	1.00657	13452.1	0.00882057	0.726193	490.317	2.047	0.956008
Cal509750W	orf19.3922	0.992219	1.00561	13579.6	0.00101242	0.396487	151.003	2.045	1.22895
Cal603810W	orf19.3415	0.991044	1.00625	13509.5	0.000936508	0.387714	144.073	2.0425	1.3527
CalR05640W	orf19.171	0.599864	0.997937	7278.6	0.0107723	0.761415	550.621	2.0415	3.05541
Cal703630W	orf19.6555	0.769947	1.00166	9206.11	0.0115445	0.767339	572.561	2.0415	2.56185
Cal403290W	orf19.4639:orf19.4637	0.999304	1.00145	14222.1	0.00201656	0.442727	217.917	2.035	0.0608112
Cal508660C	orf19.3219	0.996815	1.00367	13915.3	0.0105977	0.76398	545.738	2.031	NaN
Cal401660C	orf19.4164	0.985473	1.00759	13239.4	0.00941477	0.729519	509.804	2.0285	1.09531
Cal200490W	orf19.2108:orf19.2107.1	0.986005	1.00763	13262.3	0.039089	0.937748	1165.42	2.0265	1.19289
CalR15530W	orf19.178	0.998273	1.00235	14068.8	0.00505245	0.590403	358.05	2.0265	0.647003
Cal224050C	orf19.5356	0.875175	1.00454	10692.3	0.115836	1.0191	2272.77	2.016	2.46639
Cal306690W	orf19.278:orf19.279	0.999001	1.0019	14167.9	0.00411594	0.547156	320.514	2.0155	0.116673
CalR21200W	orf19.7344	0.990073	1.00647	13458.3	0.0303879	0.894959	1001.8	2.015	0.998435
Cal205510W	orf19.1576	0.99545	1.00404	13798.9	0.01555	0.819345	678.687	2.0145	0.272236
CalR05760W	orf19.164,orf19.163	0.99609	1.0042	13850.6	0.00968737	0.738789	518.463	2.013	0.784889
CalR22050W	orf19.7561	0.995406	1.00414	13795.9	0.0144396	0.804731	650.483	2.013	0.103238
CalR03660W	orf19.2549	0.980642	1.0077	13037.6	0.0103112	0.766205	537.293	2.006	1.18511
CalR01060C	orf19.7490	0.984744	1.00784	13207.6	0.0102574	0.770104	535.558	2.0015	1.07127
CalR13570W	orf19.3859	0.944905	1.00882	12011	0.0119379	0.775695	583.702	2.0015	1.65251
Cal705800W	orf19.3699	0.895398	1.00646	11030.7	0.0124645	0.778491	597.947	1.9955	1.97495
Cal108920C	orf19.4473	0.995242	1.00439	13782.8	0.0122712	0.773087	592.727	1.988	0.234759
Cal705290C	orf19.6469	0.987103	1.0074	13312	0.0205335	0.859913	797.195	1.9875	1.31875
Cal105220W	orf19.3693	0.995302	1.00424	13787.8	0.0133996	0.782903	623.293	1.986	0.0961665
Cal223090W	orf19.1756	0.995433	1.0041	13797.8	0.0155224	0.820876	677.889	1.9815	0.215668
CalR13840C	snR61	0.990508	1.00634	13481.3	0.0112291	0.756791	563.505	1.977	0.816001
Cal603420W	orf19.3431	0.998221	1.00244	14063.5	0.0022588	0.442297	231.545	1.9735	0.492853
Cal120450W	orf19.4757	0.994623	1.00419	13738.9	0.0120352	0.771637	586.565	1.973	0.379009
Cal502370W	orf19.1964	0.998826	1.00215	14139.2	0.00237543	0.447013	237.398	1.9705	0.25668
Cal317500C	orf19.6738	0.976764	1.00771	12896.2	0.0268068	0.892943	932.247	1.9675	1.57331
Cal118540W	orf19.5094	0.994721	1.00415	13745.5	0.0131677	0.78843	617.093	1.965	0.248902
Cal317630W	orf19.6736	0.998023	1.00259	14039.6	0.00726501	0.683571	439.545	1.957	0.182434
Cal204740W	orf19.1534	0.991198	1.00613	13519.2	0.0119779	0.771378	584.723	1.956	0.743876
Cal222390W	orf19.1356	0.994874	1.00423	13756.7	0.0175038	0.859763	727.562	1.955	0.285671
Cal508950W	orf19.1287	0.966136	1.00845	12558.2	0.0122215	0.773319	591.411	1.9545	1.35835
Cal219650W	orf19.3601	0.867291	1.00288	10565.6	0.0133016	0.786694	620.604	1.9525	2.05415
CalR14870W	orf19.699	0.00343823	0.889643	290.303	0.137626	1.01383	2538.86	1.952	NaN
Cal509940W	orf19.3931	0.985335	1.00759	13233.2	0.0124527	0.781126	597.51	1.948	0.972979
CalR10870W	orf19.6309	0.980939	1.00764	13049.7	0.0010911	0.405385	156.806	1.948	1.53159
Cal214770W	orf19.35	0.993359	1.00466	13653	0.0119462	0.772768	583.933	1.945	0.574171
Cal601680C	orf19.3642	0.999226	1.00165	14207	0.00273154	0.465647	256.616	1.936	0.115965
Cal702990W	orf19.6588,orf19.6587	0.99821	1.0025	14062.3	0.00679572	0.665338	423.308	1.9355	0.0714178
Cal109800W	orf19.1070	0.190487	0.995729	3137.57	0.00726915	0.679548	439.72	1.9335	4.24618
Cal108840C	orf19.4468	0.994084	1.00455	13701.7	0.0145059	0.805326	652.112	1.925	0.261629
Cal105060W	orf19.3685	0.981894	1.00784	13087.7	0.0132043	0.787366	618.102	1.9245	1.02743
Cal220100C	orf19.215	0.990658	1.00635	13489.3	0.0225445	0.873449	841.411	1.923	NaN
CalR21400C	orf19.6602	0.984346	1.008	13189.9	0.0132981	0.789713	620.542	1.922	0.957423
Cal310490W	orf19.5919	0.921968	1.00688	11521	0.0142567	0.800698	645.909	1.9215	1.71473
Cal700870W	orf19.7080	0.99791	1.00262	14026	0.00801104	0.699277	464.973	1.92	NaN
Cal403060W	orf19.4650	0.974162	1.0079	12806.4	0.0129248	0.777095	610.277	1.9195	1.18865
Cal217100W	orf19.1862	0.99442	1.00419	13724.9	0.0178551	0.8624	735.802	1.9175	0.132229
CalR09750C	orf19.524	0.986598	1.00774	13288.1	0.0210276	0.863144	808.293	1.917	1.23744
Cal132590W	orf19.7231	0.987117	1.00735	13312.7	0.0135721	0.780397	628.331	1.9125	0.850649
Cal214230C	orf19.17	0.975769	1.00769	12861.3	0.0134203	0.780964	623.965	1.909	1.14268
CalR12110W	orf19.5286	0.016795	0.925323	710.259	0.145221	1.01802	2628.59	1.908	NaN
Cal505210W	orf19.4246	0.991526	1.00597	13539.1	0.0133485	0.78626	621.729	1.905	0.640639
Cal309670W	orf19.5867	0.978807	1.0081	12971.7	0.0142374	0.805859	645.219	1.8955	1.0543
Cal223430W	orf19.1742	0.993121	1.0047	13639.2	0.0191877	0.850245	766.687	1.894	NaN
Cal212160W	orf19.3572	0.993551	1.0045	13666.3	0.014187	0.806157	643.848	1.891	0.404465
Cal216170W	orf19.2277	0.99041	1.00645	13475.8	0.0236349	0.875882	865.086	1.888	NaN
Cal130630W	orf19.4963	0.993921	1.00453	13690.5	0.0198585	0.858955	781.757	1.8875	0.183141
Cal602800W	orf19.137	0.996376	1.00393	13875	0.0126653	0.771092	603.389	1.886	NaN
Cal707130W	orf19.5126	0.995254	1.00433	13784.2	0.01253	0.775897	599.649	1.884	0.663266
Cal407060C	orf19.2672	0.988342	1.00732	13369.6	0.0147874	0.811629	658.988	1.881	0.75519
CalR10980C	orf19.6306,orf19.6305	0.989564	1.00644	13431.5	0.00150863	0.465106	185.631	1.88	1.1837
Cal107520W	orf19.3037	0.993486	1.00458	13662.3	0.0189048	0.864132	760.411	1.877	NaN
Cal305300W	orf19.1618.1	0.978734	1.00809	12968.8	0.0154279	0.824908	675.648	1.8745	1.02318
Cal113510C	orf19.2445	0.987394	1.00735	13325.4	0.0150483	0.813619	665.757	1.874	0.779232
CalR14730W	snR5d	0.996017	1.00419	13844.7	0.0113658	0.762454	567.666	1.8665	0.522552
Cal118390C	orf19.5081	0.981315	1.00781	13064.6	0.0452022	0.950624	1271.51	1.866	1.16248
Cal305250W	orf19.1620	0.99131	1.00603	13525.4	0.00197032	0.453175	214.767	1.865	1.05076
Cal101870W	orf19.6020	0.992692	1.00525	13609.5	0.0243747	0.880773	881.364	1.8645	0.433456
Cal306550W	orf19.272	0.69185	1.00089	8278.39	0.0652264	1.00332	1589.08	1.8625	2.94086
Cal602790C	orf19.137	0.991864	1.00589	13558.1	0.00197792	0.440923	215.309	1.858	0.991364
CalR05590W	orf19.173	0.979431	1.00795	12993.1	0.0221856	0.878333	833.883	1.856	1.36754
Cal128770W	orf19.3762	0.987839	1.00709	13346	0.0158061	0.826823	685.051	1.855	0.731148
Cal206720W	orf19.5801	0.993535	1.00456	13665.5	0.0209979	0.864375	807.719	1.8475	0.164756
CalR14710W	orf19.695	0.988257	1.00731	13365.7	0.0160014	0.831039	690.136	1.847	0.702864
Cal109300C	orf19.1048	0.927407	1.00743	11630.5	0.086913	1.01726	1898.33	1.847	1.90919
Cal128610W	orf19.68.2	0.993447	1.00461	13658.8	0.0170028	0.843733	715.337	1.8465	0.228395
Cal131210W	orf19.4997	0.91267	1.00651	11341.8	0.0160573	0.830964	691.553	1.846	1.67019
Cal406840W	orf19.2684	0.284421	0.999336	4125.16	0.0586605	0.980381	1490.5	1.846	NaN
Cal708210W	orf19.5504	0.663437	1.00023	7961.3	0.0651152	1.00481	1587.46	1.846	NaN
Cal510880W	orf19.3976	0.841425	1.00331	10175.2	0.0163975	0.839576	699.979	1.8445	2.00889
Cal604570C	orf19.3504	0.986937	1.00745	13303.9	0.00185438	0.463276	207.266	1.8435	1.22259
Cal603610W	orf19.3423	0.996137	1.00404	13855.1	0.0135542	0.78247	627.662	1.84	NaN
Cal223150C	orf19.1754	0.991881	1.00583	13559	0.0264672	0.889814	924.923	1.8395	0.576292
Cal204340W	orf19.1515:orf19.1516	0.986182	1.00767	13269.6	0.0165266	0.83439	703.586	1.8365	0.764382
Cal109560W	orf19.1059,orf19.1061	0.990419	1.00639	13476.3	0.0305562	0.896275	1005.11	1.836	0.654781
Cal508780W	orf19.3214	0.995957	1.00434	13839.1	0.0141084	0.804843	641.888	1.836	NaN
Cal206950C	orf19.5785	0.308831	0.997984	4370.55	0.00953209	0.730794	513.245	1.832	3.59493
Cal511120C	orf19.3990	0.997598	1.00307	13988.3	0.00357695	0.539896	296.324	1.832	0.418607
Cal501590W	orf19.570	0.780236	1.00076	9337.55	0.0164003	0.836761	700.071	1.8285	2.21961
CalR13850W	snR61	0.991271	1.00606	13523.2	0.0164686	0.837298	702.256	1.827	0.514774
Cal507010W	orf19.4349	0.989533	1.00648	13429.9	0.0166674	0.835675	706.508	1.827	0.608112
Cal303720W	orf19.1682	0.928034	1.00736	11643.2	0.0920304	1.01101	1967.24	1.8265	1.8604
Cal132270C	orf19.7215.3	0.993151	1.00466	13641.2	0.0222484	0.876033	835.464	1.823	0.172534
Cal209550W	orf19.794	0.990769	1.00626	13494.8	0.0291346	0.896306	978.767	1.8165	0.644174
Cal701980C	orf19.7022	0.997636	1.00283	13993	0.0086294	0.722775	484.613	1.8155	0.0417193
Cal112290W	orf19.419,orf19.418	0.992707	1.00519	13610.6	0.0175832	0.860743	729.315	1.8105	0.316077
Cal505440W	orf19.4261	0.997358	1.00338	13964.9	0.00891304	0.721508	493.542	1.81	0.428507
Cal502760W	orf19.1944	0.998547	1.00235	14101.8	0.00460248	0.565169	339.963	1.809	NaN
Cal602560W	orf19.124	0.969748	1.00888	12665.3	0.0188123	0.868121	758.321	1.801	1.07763
CalR01430W	orf19.7475	0.997282	1.00338	13958.1	0.00697861	0.669669	429.628	1.801	0.322441
Cal313310C	orf19.7358	0.997439	1.00332	13972.5	0.00968875	0.735026	518.494	1.7995	0.0883883
Cal405300W	orf19.2765	0.962037	1.0078	12442.3	0.0190504	0.859938	763.557	1.7995	1.18158
Cal302270C	orf19.2506	0.992436	1.00555	13593	0.0224838	0.87814	839.985	1.799	NaN
Cal700880C	orf19.7079	0.971619	1.00872	12724.2	0.0298606	0.895818	991.9	1.7975	1.43048
Cal202560C	orf19.2002	0.92231	1.0068	11527.5	0.0176998	0.860638	732.197	1.795	1.53159
Cal608420W	orf19.5750	0.997716	1.0027	14001.7	0.00853692	0.719186	481.731	1.795	0.0212132
Cal119980W	orf19.4737	0.988723	1.00686	13389.9	0.0333596	0.908609	1059.56	1.7935	0.747412
Cal122960C	orf19.4871	0.994179	1.00437	13708.8	0.0188827	0.868603	759.974	1.793	NaN
Cal409910W	orf19.1409.3	0.995965	1.00428	13840	0.00371981	0.533663	302.371	1.7925	0.631446
Cal403120W	orf19.4647	0.990722	1.00635	13492.5	0.0180276	0.856459	740.054	1.792	0.480833
Cal220010C	orf19.217	0.992646	1.00541	13607	0.0241173	0.87365	875.652	1.788	0.220617
Cal313420W	orf19.7362	0.990009	1.00654	13454.3	0.0184472	0.862258	749.841	1.7865	0.50841
Cal311780W	orf19.5992	0.998178	1.00254	14057.9	0.00594962	0.62927	393.17	1.786	NaN
Cal118750W	orf19.5104	0.992722	1.00507	13612.3	0.0236915	0.873511	866.441	1.7855	0.183141
Cal129250W	orf19.6344	0.97785	1.00797	12936	0.0197012	0.857267	778.302	1.7845	0.900147
Cal510560W	orf19.3959	0.997812	1.00266	14013	0.00838302	0.714529	477.058	1.7835	0.129401
Cal303970W	orf19.1673	0.974617	1.00779	12821.6	0.0200255	0.855959	785.668	1.779	0.961665
Cal204630C	orf19.1530	0.990408	1.00652	13475.6	0.0190738	0.855666	764.183	1.7765	0.465983
Cal313470C	orf19.7363	0.960193	1.00776	12392.2	0.0199689	0.861161	784.219	1.7765	1.17026
Cal202450W	orf19.2006.1	0.992326	1.00558	13586	0.0191732	0.852209	766.455	1.7745	0.287793
CalR23670W	orf19.7655	0.992073	1.00575	13570.8	0.0189807	0.862163	762.181	1.773	0.33234
Cal119050C	orf19.382	0.992989	1.00499	13630.2	0.0199834	0.856686	784.602	1.769	0.140007
Cal316520W	orf19.6793	0.997522	1.00327	13980.5	0.00902485	0.718516	497.324	1.767	NaN
Cal507680C	orf19.6659	0.990785	1.0062	13496.3	0.0192733	0.851433	769.077	1.766	0.425678
Cal605340W	LSU-C2809	0.981519	1.00788	13072.9	0.0204279	0.862974	794.794	1.7655	0.785596
Cal412120W	orf19.1795	0.998073	1.0025	14044.7	0.00469841	0.558033	344.343	1.7615	0.127986
Cal100980W	orf19.6062.3:orf19.6062	0.973378	1.00795	12781.2	0.0210883	0.860761	809.518	1.759	0.95318
Cal108500W	orf19.1031	0.992455	1.0055	13594.3	0.0206501	0.862305	799.645	1.7575	0.174655
Cal129090W	orf19.6351	0.982943	1.00799	13130.7	0.0447315	0.94899	1263.58	1.757	0.881055
Cal705020W	orf19.6482	0.996479	1.00389	13882.5	0.0110007	0.751887	557.638	1.757	0.265872
Cal114020W	orf19.1827	0.962617	1.00797	12457.6	0.0212077	0.860784	812.358	1.7555	1.10945
Cal510740W	orf19.3967	0.996109	1.00415	13852.8	0.00441477	0.571161	332.107	1.7545	0.548008
Cal602640W	orf19.131.2	0.974482	1.00787	12817	0.00212146	0.439143	224.214	1.752	1.393
Cal211960W	orf19.3561	0.958326	1.00829	12343.1	0.0716349	0.99999	1683.58	1.7505	1.4432
Cal408280W	orf19.1310	0.998914	1.00203	14155.1	0.000598344	0.333462	116.293	1.747	NaN
Cal606580W	orf19.5575	0.995388	1.00419	13794.4	0.0161774	0.831241	694.593	1.743	NaN
Cal101120W	orf19.6055	0.988771	1.00684	13392.7	0.0212636	0.860642	813.591	1.7405	0.478711
Cal210380W	orf19.4490	0.987637	1.00745	13336.6	0.0210842	0.863023	809.358	1.7395	0.536694
Cal508720W	orf19.3216	0.995262	1.00427	13784.9	0.0165307	0.831701	703.775	1.739	NaN
Cal112420W	orf19.413.1	0.989529	1.00655	13429.5	0.0320428	0.903307	1034.12	1.735	0.612354
Cal413520C	orf19.4414	0.992793	1.00486	13617.1	0.00456246	0.57487	338.098	1.7345	0.812466
Cal102750W	orf19.3315	0.9885	1.00713	13378.3	0.0349365	0.908851	1089.8	1.7335	0.634275
CalR11160C	orf19.1808	0.95997	1.00775	12386.5	0.022824	0.870316	847.669	1.732	1.1045
Cal129030C	orf19.6354	0.978177	1.00788	12948	0.0227246	0.873422	845.369	1.73	0.804688
Cal300900C	orf19.5423	0.991919	1.0058	13561.5	0.0236115	0.877256	864.477	1.7285	0.0968737
Cal705050C	orf19.6480	0.996963	1.00375	13928.6	0.0108516	0.755962	552.85	1.728	NaN
Cal214240W	orf19.17	0.406309	0.990981	5335.15	0.0148992	0.811617	662.02	1.7275	3.13743
Cal311060C	orf19.5953	0.996779	1.00371	13911.5	0.011784	0.769144	579.489	1.7185	0.122329
Cal204750C	orf19.1535	0.660287	1.00152	7926.89	0.0185983	0.866527	753.477	1.7175	2.43033
Cal410660W	orf19.3809	0.948151	1.00857	12086.1	0.00256936	0.443214	248.222	1.7175	1.67231
Cal412480W	orf19.1237	0.992127	1.00566	13574	0.00463423	0.564286	341.596	1.715	0.875398
Cal218620C	orf19.1351	0.991653	1.00595	13546.6	0.0240311	0.877103	873.608	1.7145	0.116673
Cal124020W	orf19.984	0.987724	1.00733	13340.7	0.0355431	0.914778	1101.08	1.7135	0.683772
Cal129970W	orf19.4934	0.95375	1.0086	12222.8	0.0236446	0.874005	865.379	1.7135	1.14339
Cal210500W	orf19.145	0.961634	1.0076	12431.5	0.0240421	0.875301	873.824	1.712	1.05359
Cal124410W	orf19.1005	0.590709	0.99876	7184.16	0.0179779	0.862583	738.817	1.7115	2.61276
Cal310830W	orf19.5938	0.985687	1.00766	13249.2	0.0233437	0.876295	858.855	1.711	0.5572
Cal132990W	orf19.7257:orf19.7258,orf19.7256	0.991606	1.00598	13543.6	0.0237971	0.872962	868.744	1.7105	0.137886
Cal503920W	orf19.3197	0.997694	1.00275	13999.2	0.0056577	0.630615	381.984	1.7085	0.1393
Cal607620W	orf19.5629	0.996665	1.00366	13899.5	0.0122188	0.776535	591.368	1.701	0.149907
Cal202070C	orf19.2023	0.979948	1.00813	13012.1	0.0493237	0.955481	1340.83	1.6975	0.938331
CalR09190W	orf19.489:orf19.490	0.984404	1.00784	13192.3	0.0244907	0.882761	883.846	1.695	0.572756
CalR16960W	orf19.2623	0.914937	1.00672	11384.9	0.0231994	0.875417	855.595	1.6925	1.43048
Cal205240C	orf19.1562	0.988368	1.00728	13371	0.0344576	0.9078	1081.08	1.6915	0.613062
Cal222330C	orf19.1358	0.953135	1.00854	12206.4	0.0256425	0.893173	908.179	1.6855	1.10804
Cal314040W	orf19.7385	0.985905	1.00767	13258.2	0.0223154	0.876287	836.659	1.685	0.923481
Cal100340W	orf19.6091	0.991104	1.00624	13513.5	0.0264424	0.891046	924.352	1.681	0.0636396
Cal403200W	orf19.4643	0.691812	1.00103	8277.89	0.0204638	0.859478	795.717	1.681	2.28961
Cal218800W	orf19.1434,orf19.1433	0.947515	1.009	12071.4	0.075764	1.00075	1743.36	1.6805	1.48563
Cal304950W	orf19.1633	0.991017	1.00629	13508.2	0.0287647	0.894421	971.236	1.6805	0.150614
Cal101570W	orf19.6033	0.991014	1.00636	13508	0.0259696	0.895952	914.716	1.6795	0.11243
Cal215380W	orf19.2237.1	0.98897	1.00683	13402	0.0345017	0.907314	1081.92	1.679	0.473762
Cal111180W	orf19.48	0.844933	1.0032	10227.1	0.0225438	0.878118	841.399	1.6785	1.75857
Cal402700W	tS(UGA)3	0.961469	1.00772	12426.9	0.0260276	0.891584	915.875	1.6745	0.999142
Cal107860W	orf19.3052	0.956643	1.00805	12297.9	0.0266756	0.890622	929.529	1.6725	1.05005
Cal219580W	orf19.3605	0.977361	1.00783	12918.1	0.0264313	0.894836	924.164	1.6695	0.72337
CalR15150C	orf19.1857,orf19.1856	0.583481	0.997715	7108.9	0.0187026	0.865815	755.997	1.6635	2.55902
Cal601940W	orf19.92	0.903178	1.00585	11167.9	0.024864	0.887389	891.557	1.6625	1.45452
Cal108730C	orf19.4463	0.98666	1.00759	13291.4	0.0392277	0.936425	1167.97	1.659	0.602455
Cal608170W	orf19.5734	0.994324	1.00438	13718.7	0.014597	0.80729	654.158	1.6565	0.413658
CalR14680W	orf19.693	0.988605	1.00688	13383.6	0.0263996	0.895855	923.458	1.656	0.309713
Cal315330W	orf19.7446	0.980097	1.00799	13018.2	0.027597	0.888622	948.304	1.654	0.630739
Cal114340C	orf19.6275	0.979441	1.00789	12993.5	0.0278544	0.889009	953.374	1.651	0.640639
CalR22590C	orf19.7588	0.970832	1.00863	12699.4	0.0277012	0.888031	950.351	1.651	0.823072
CalR07310W	orf19.2397.3	0.898077	1.00589	11078	0.0259924	0.892488	915.095	1.65	1.4623
Cal703850W	orf19.6541	0.939498	1.00854	11887.5	0.04151	0.933975	1207.89	1.6495	1.6016
Cal707970W	orf19.6693	0.995459	1.00398	13799.5	0.0151919	0.815296	669.876	1.649	0.118794
Cal120260W	orf19.4752	0.993094	1.00495	13637.1	0.0228088	0.872032	847.201	1.646	NaN
Cal704280W	orf19.6524	0.986391	1.00774	13278.9	0.0272995	0.886928	942.318	1.645	0.403051
Cal303870W	orf19.1676	0.990649	1.00642	13489	0.029176	0.893784	979.586	1.6395	0.0445477
Cal604690W	orf19.3496	0.971242	1.00862	12712.6	0.0285024	0.893939	966.283	1.6375	0.796909
Cal207930W	orf19.868	0.962504	1.008	12454.4	0.0291194	0.897745	978.5	1.636	0.920653
Cal507730W	orf19.6661	0.99613	1.0041	13854.5	0.00657902	0.671338	415.572	1.634	0.33234
Cal116760W	orf19.4430	0.972688	1.00788	12759	0.058579	0.98015	1489.34	1.634	1.0253
Cal708410C	orf19.7199:orf19.7198	0.989336	1.00685	13420.3	0.0146522	0.807262	655.661	1.632	0.742462
Cal100460W	orf19.6082	0.990063	1.00653	13457.6	0.0317032	0.900745	1027.44	1.6305	0.168998
Cal103250W	orf19.3337	0.988458	1.00723	13376	0.0286246	0.893901	968.757	1.63	0.254558
Cal507260W	orf19.2649	0.964255	1.0083	12504.5	0.0296611	0.897265	988.251	1.6275	0.884591
Cal212020W	orf19.3564	0.797504	0.999812	9564.57	0.189738	1.02893	3129.72	1.626	NaN
CalR20670W	orf19.7322	0.989841	1.00651	13446	0.0322126	0.904574	1037.41	1.626	0.159806
Cal108830W	orf19.4467	0.989451	1.00675	13425.9	0.033608	0.910243	1064.21	1.625	0.258801
Cal204500W	snR48	0.989484	1.00664	13427.5	0.0335562	0.910543	1063.24	1.624	0.268701
CalR06030W	orf19.2826,orf19.2827	0.764037	1.00225	9132.78	0.024089	0.874812	874.986	1.6225	1.98485
Cal306280C	orf19.261	0.970235	1.00881	12680.9	0.0302146	0.895317	998.64	1.6175	0.778524
Cal205610W	orf19.1582	0.985252	1.00757	13229.7	0.0295839	0.896799	986.711	1.6165	0.392444
Cal130320W	orf19.4952	0.988164	1.00728	13361.6	0.0368703	0.919535	1124.83	1.6155	0.393859
CalR02690W	orf19.3235	0.986628	1.0077	13289.6	0.0302429	0.894327	999.137	1.6105	0.31042
Cal111010W	orf19.756	0.971854	1.00861	12731.9	0.0567854	0.9726	1461.63	1.6095	1.0246
Cal115070W	orf19.6244	0.867426	1.00295	10567.8	0.112295	1.0157	2228.76	1.6095	1.93394
Cal312130W	orf19.6008	0.974565	1.00781	12819.9	0.0215983	0.866925	820.952	1.6075	1.13491
Cal108710W	orf19.4461	0.972886	1.00787	12765.5	0.0315314	0.902945	1024.33	1.6055	0.710642
Cal206580W	orf19.5808	0.987737	1.0072	13341.5	0.0311242	0.898386	1016.23	1.6045	0.226981
Cal215250W	orf19.2230	0.988876	1.00687	13397.3	0.0310801	0.9007	1015.31	1.604	0.138593
Cal112550W	tN(GUU)2	0.989405	1.00685	13423.5	0.0327288	0.912	1047.45	1.604	0.0678822
CalR07230W	orf19.2400	0.869638	1.00391	10602.9	0.048011	0.956919	1318.9	1.602	1.97707
Cal103700W	orf19.3360	0.988543	1.00703	13381	0.0360138	0.923611	1109.42	1.6015	0.266579
Cal209830W	orf19.4516,orf19.4515	0.985418	1.0076	13237.3	0.0422981	0.938591	1221.74	1.6015	0.555079
Cal605030W	orf19.3467	0.970234	1.00888	12680.8	0.0316756	0.901729	1027.04	1.6	0.749533
CalR08840W	orf19.467	0.84145	1.00326	10175.7	0.0427654	0.934646	1230.19	1.6	2.09304
CalR15180W	orf19.1855	0.985629	1.00767	13246.4	0.0312346	0.899781	1018.66	1.599	0.330926
Cal304190W	orf19.1666	0.932268	1.00765	11732.2	0.031599	0.903097	1025.68	1.5985	1.16602
Cal704450W	orf19.6514	0.979021	1.00817	12979	0.0320248	0.904561	1033.86	1.5985	0.555079
Cal313380W	orf19.7360:orf19.7361	0.948097	1.00866	12084.9	0.0392954	0.934959	1169.13	1.598	1.45098
Cal701920W	orf19.7027	0.994079	1.00462	13701.3	0.0155176	0.823626	677.805	1.598	0.336583
Cal202890W	orf19.1989	0.981558	1.00778	13074.4	0.0314596	0.902673	1022.93	1.5975	0.490025
CalR02490W	orf19.3248	0.974358	1.00788	12812.8	0.0217571	0.866099	824.42	1.5975	1.12359
CalR17630C	orf19.3708	0.944165	1.0087	11993.9	0.0328316	0.909618	1049.59	1.591	1.04793
Cal408470W	orf19.1301	0.85217	1.00357	10334.2	0.0278785	0.887824	953.989	1.5895	1.6016
Cal110810C	orf19.764	0.980248	1.00779	13023.8	0.0477046	0.960056	1313.76	1.588	0.786303
CalR02840W	orf19.3230	0.960317	1.00775	12395.3	0.032695	0.912813	1046.82	1.5855	0.873277
Cal511060C	orf19.3986	0.858286	1.00311	10425.7	0.029058	0.899679	977.079	1.584	1.56553
Cal603390W	orf19.3432.1,snR189d	0.983346	1.00797	13147.6	0.007	0.667303	430.202	1.5835	0.941159
Cal407500W	orf19.3364	0.807092	1.00101	9693.98	0.0271663	0.886577	939.742	1.582	1.7706
Cal317440C	orf19.6741	0.979335	1.00792	12990.2	0.0331153	0.90707	1054.92	1.58	0.517602
Cal409940W	orf19.3846	0.986761	1.00762	13296.5	0.0337308	0.911866	1066.44	1.578	0.207889
Cal205310C	orf19.1565	0.980069	1.00811	13016.7	0.033314	0.909077	1058.83	1.5775	0.495682
Cal202950C	orf19.1442	0.986864	1.00759	13300.5	0.0338371	0.909648	1068.53	1.577	0.199404
CalR20990W	orf19.7337	0.987668	1.00734	13338	0.0384092	0.929132	1152.99	1.5765	0.293449
Cal220850C	orf19.4088	0.980741	1.00758	13041.7	0.0333112	0.910717	1058.76	1.575	0.470933
Cal302690W	orf19.3159	0.95325	1.00859	12209.5	0.0339475	0.909242	1070.91	1.5745	0.935502
Cal210410W	snR189b	0.98645	1.00766	13281.3	0.0340807	0.907776	1073.52	1.5735	0.217082
Cal108810C	orf19.4466	0.9886	1.00695	13383.4	0.0350842	0.909428	1092.49	1.5715	0.0912168
Cal223100C	orf19.1756	0.972333	1.00802	12747.3	0.0340718	0.909208	1073.3	1.5705	0.662559
Cal101840W	orf19.6021	0.937008	1.00886	11832.9	0.0340552	0.910443	1072.97	1.57	1.08187
Cal414470W	orf19.2886	0.98284	1.00809	13125.9	0.0343554	0.910073	1079.2	1.5635	0.376888
Cal223530W	orf19.5316	0.984822	1.00749	13210.8	0.0438944	0.945067	1249.39	1.5635	0.511238
Cal606910W	orf19.5595	0.982863	1.00798	13127.1	0.034784	0.908144	1086.97	1.5635	0.368403
Cal122950W	orf19.4871	0.987016	1.00739	13307.7	0.0398889	0.936775	1179.42	1.56	0.354968
Cal507450W	orf19.2639.1	0.957335	1.00827	12316.6	0.00490062	0.577317	352.136	1.557	1.35199
Cal123920W	orf19.4909.1	0.986869	1.00752	13300.7	0.0402761	0.936758	1186.52	1.557	0.354968
Cal125890W	orf19.676	0.981329	1.00776	13065.1	0.0498012	0.957056	1348.7	1.556	0.632154
Cal111640W	orf19.450	0.987751	1.00714	13342.2	0.0379841	0.934448	1145.24	1.5545	0.19304
Cal214150W	orf19.5498	0.984043	1.0079	13175.8	0.0360373	0.922579	1109.9	1.554	0.295571
Cal706500W	orf19.5159:orf19.5158	0.858457	1.00323	10428.4	0.0327384	0.910518	1047.65	1.553	1.51887
Cal206440W	orf19.5814.1	0.984921	1.00752	13215.3	0.0363623	0.921136	1115.89	1.5525	0.239709
Cal310660W	orf19.5928	0.994384	1.0043	13722.8	0.0190524	0.85736	763.61	1.552	0.0226274
CalR14740W	snR5d	0.994395	1.00424	13723.3	0.0190366	0.862	763.267	1.552	0.0226274
Cal212120C	orf19.3569	0.979577	1.00789	12998.8	0.0361015	0.922593	1111.14	1.548	0.451134
Cal610360W	orf19.2160	0.82969	1.00285	10008	0.0613809	0.998216	1531.76	1.5465	2.05415
Cal114640W	orf19.6264.3	0.987756	1.00708	13342.6	0.036833	0.92019	1124.31	1.541	0.039598
Cal510860W	orf19.3974	0.994108	1.00451	13703.5	0.0167847	0.838655	709.915	1.54	0.210718
Cal401760C	orf19.4160:orf19.4159	0.988515	1.00707	13379.1	0.00881642	0.73	490.271	1.5395	0.704986
Cal700940C	orf19.7076	0.982184	1.00785	13099.1	0.0380945	0.933993	1147.4	1.538	0.329512
Cal128010W	orf19.5244	0.946124	1.00915	12038.9	0.0370028	0.919674	1127.46	1.5375	0.952473
Cal204950W	orf19.1543	0.553887	0.994403	6804.72	0.0235328	0.876581	862.871	1.5345	2.46144
Cal500850C	orf19.949	0.99385	1.00453	13685.6	0.0193672	0.850394	771.208	1.533	0.131522
Cal105300C	orf19.2927	0.879782	1.00473	10766.2	0.0363458	0.922329	1115.65	1.5305	1.38098
CalR17680W	orf19.3711	0.986861	1.00765	13300.4	0.0404741	0.938352	1189.55	1.5305	0.221324
Cal220930C	orf19.4091	0.976789	1.00767	12897.1	0.0524044	0.96119	1391.25	1.5285	0.795495
Cal707480W	orf19.1334	0.967232	1.0085	12590.5	0.0385908	0.92887	1156.38	1.528	0.675994
Cal703300C	orf19.6574	0.992637	1.00547	13606.4	0.0180552	0.852182	740.783	1.5275	0.351432
Cal209900W	orf19.4511	0.880792	1.00486	10782.7	0.0365307	0.920574	1119.08	1.527	1.37037
CalR03040W	orf19.3222	0.583943	0.997564	7113.63	0.0253423	0.895634	901.44	1.527	2.36598
Cal500140C	orf19.5692	0.98296	1.00786	13131.6	0.00884196	0.719775	491.072	1.527	0.865499
CalR11440W	tH(GUG)1	0.925228	1.00695	11586.4	0.037842	0.932534	1142.46	1.5245	1.10945
Cal128050C	orf19.5242	0.992068	1.00581	13570.5	0.0262484	0.894918	920.451	1.524	NaN
Cal129220W	orf19.6345	0.987271	1.00729	13320	0.0383623	0.929548	1152.18	1.5235	0.0643467
Cal300650W	orf19.5437	0.955943	1.0079	12279.9	0.0395908	0.938903	1174.16	1.5215	0.818122
Cal502320C	orf19.1967,orf19.1966	0.949455	1.00803	12117.7	0.00614631	0.640719	400.355	1.5215	1.37532
Cal124630W	orf19.1837	0.987176	1.00727	13315.5	0.0382602	0.933316	1150.44	1.5205	0.0304057
Cal311930W	orf19.6000	0.986211	1.00763	13270.9	0.0383299	0.930318	1151.69	1.52	0.0820243
Cal405270W	orf19.2767	0.976649	1.00781	12892.3	0.0391732	0.938215	1166.97	1.52	0.470933
CalR08240W	orf19.4365	0.993313	1.00468	13650.5	0.0142443	0.803113	645.542	1.52	0.34224
Cal509610W	orf19.3914	0.940778	1.00842	11915.8	0.0385894	0.930383	1156.34	1.5185	0.969443
CalR22100C	orf19.7564	0.975893	1.0076	12865.9	0.0560663	0.968296	1450.06	1.5185	0.778525
Cal609050W	orf19.1215,orf19.1214	0.895481	1.0064	11032	0.0377143	0.930971	1140.24	1.5175	1.27916
Cal301700C	orf19.5378	0.97494	1.00777	12832.6	0.0575956	0.976094	1474.02	1.5165	0.795495
Cal303140C	orf19.1712	0.975163	1.00771	12840.4	0.0397985	0.939218	1177.88	1.513	0.494975
Cal200800W	orf19.2091	0.941014	1.0083	11920.9	0.0852167	1.01295	1875.32	1.512	1.30249
Cal205270C	orf19.1563	0.984821	1.00756	13210.8	0.0397564	0.939755	1177.21	1.512	0.140007
CalR20340W	orf19.7305	0.975322	1.0078	12846.1	0.040185	0.939161	1185.06	1.5105	0.485782
Cal200740C	orf19.2093	0.907795	1.00619	11252.1	0.103475	1.00967	2116.35	1.51	1.55988
Cal113390W	orf19.2451	0.980576	1.00777	13035.9	0.0408668	0.932535	1196.74	1.5095	0.330219
Cal109900W	orf19.5198	0.98664	1.00764	13290.4	0.0406894	0.931422	1193.78	1.5065	0.135057
Cal701370W	orf19.7051	0.969307	1.00878	12651.8	0.0402588	0.939372	1186.26	1.506	0.606698
CalR03410C	orf19.2533.1	0.992734	1.00501	13613.1	0.0149482	0.811236	663.337	1.504	0.35921
CalR10640W	orf19.6316.4	0.966031	1.00856	12555.1	0.0408427	0.933454	1196.32	1.504	0.653367
CalR08710W	orf19.4355	0.750216	1.00301	8963.81	0.0302126	0.89709	998.567	1.5025	1.85474
Cal704860W	orf19.6489	0.881115	1.00483	10787.7	0.0547026	0.965457	1428.18	1.5015	1.76847
CalR14400C	orf19.719	0.958402	1.00807	12345.2	0.0409683	0.93338	1198.49	1.5015	0.758726
Cal129880C	snR87:orf19.4931.1	0.917864	1.00642	11440.2	0.0401339	0.939483	1184.11	1.501	1.12289
Cal215570W	orf19.2247	0.96905	1.00902	12644.2	0.041207	0.935878	1202.55	1.4995	0.597505
Cal222620C	orf19.1776	0.300772	1.0005	4290.31	0.0186121	0.864391	753.877	1.498	3.1537
Cal312220C	orf19.6970	0.781644	1.00089	9355.53	0.031773	0.899199	1028.66	1.4975	1.73878
CalR21560C	orf19.6597	0.973251	1.00796	12777.1	0.0415652	0.933767	1208.89	1.4975	0.509824
Cal207390W	orf19.903	0.968117	1.00877	12616.2	0.0617143	1.00139	1536.62	1.497	0.929138
Cal105990W	orf19.2958	0.984811	1.00762	13210.4	0.0456708	0.953559	1279.54	1.496	0.298399
Cal111580W	orf19.4056	0.968406	1.00886	12625.3	0.0418875	0.938099	1214.81	1.493	0.596798
Cal407410W	orf19.1439	0.993364	1.0046	13653.4	0.021891	0.869041	827.462	1.493	0.0155563
Cal708370C	orf19.7200	0.982379	1.00798	13107.1	0.0424106	0.933936	1223.9	1.493	0.213546
Cal131490W	orf19.5010:orf19.5011	0.952443	1.00884	12189.8	0.0419745	0.93427	1216.27	1.4925	0.811052
Cal118550C	orf19.5095	0.984375	1.00796	13190.8	0.0464576	0.95215	1292.73	1.4915	0.344361
CalR05970W	orf19.2825	0.968379	1.00897	12624.5	0.0424203	0.932731	1224.06	1.4885	0.58902
Cal132050W	orf19.5035	0.951916	1.00872	12177.2	0.0425887	0.933601	1227.17	1.487	0.80893
Cal600630W	orf19.1192	0.98602	1.00758	13262.9	0.0102685	0.766959	535.94	1.487	0.711349
Cal510220W	orf19.3941	0.90487	1.0058	11197.9	0.0410097	0.932857	1199.19	1.486	1.18228
CalR05310W	orf19.3732	0.637137	1.00099	7674.06	0.155825	1.02678	2750.3	1.486	NaN
Cal205040C	orf19.1547	0.985838	1.00767	13255.4	0.0416529	0.934288	1210.62	1.4855	0.0318198
Cal220260W	orf19.206	0.973129	1.00791	12772.7	0.0430262	0.937519	1234.68	1.4845	0.488611
Cal316120W	orf19.6813	0.864555	1.00364	10522.5	0.0398247	0.938309	1178.32	1.4845	1.38805
Cal511950C	orf19.4040:orf19.4041	0.99323	1.00467	13645.8	0.0192781	0.849058	769.208	1.4835	0.17607
Cal502550C	snR189c	0.997205	1.00358	13950.4	0.00408696	0.548333	319.331	1.483	NaN
Cal501820W	orf19.583	0.985011	1.00747	13219.3	0.0104562	0.761357	541.365	1.4815	0.734684
Cal213080C	orf19.5204	0.949133	1.00806	12110	0.0433596	0.941949	1240.26	1.4805	0.825194
Cal127100W	orf19.1140	0.943839	1.00842	11986.5	0.0435887	0.941282	1244.33	1.48	0.878227
CalR00680W	orf19.7510	0.992553	1.00553	13600.6	0.0225714	0.87216	842.007	1.478	0.16122
CalR12570W	tC(GCA)1	0.992415	1.0056	13591.5	0.0225438	0.878118	841.399	1.4765	0.185969
CalR01290C	orf19.7483,orf19.7482	0.98296	1.00786	13131.6	0.0175852	0.857946	729.347	1.475	0.750947
Cal607580W	orf19.5628	0.980614	1.00774	13037	0.0107253	0.761814	549.281	1.4745	0.843578
Cal605440C	orf19.5513	0.989415	1.00679	13424.1	0.0106446	0.759803	547.284	1.4735	0.560736
Cal605680C	orf19.5525	0.984654	1.00781	13203.4	0.0433685	0.940734	1240.48	1.4735	0.0205061
Cal316670W	orf19.6788	0.969182	1.0088	12648.2	0.0327474	0.909023	1047.75	1.472	1.00975
CalR22020W	orf19.7557:orf19.7558	0.895814	1.00638	11037.6	0.042363	0.935732	1222.96	1.472	1.21057
Cal212870W	orf19.6884:orf19.6885	0.979269	1.008	12987.9	0.0546819	0.966268	1427.91	1.4715	0.566393
Cal104990W	orf19.3682	0.983738	1.0078	13163.8	0.0443858	0.947202	1257.38	1.4705	0.0685894
Cal406480C	orf19.2703	0.982447	1.00798	13109.8	0.0447371	0.947719	1263.66	1.4705	0.143543
CalR23370W	orf19.7631:orf19.7632	0.984399	1.00791	13191.9	0.0464686	0.948352	1292.9	1.469	0.308299
Cal122790C	orf19.4864	0.967478	1.00854	12597.5	0.065882	1.00276	1598.55	1.4685	0.87752
CalR14820W	snR66	0.948117	1.00861	12085.3	0.0446542	0.948739	1262.04	1.4685	0.816708
Cal316680W	orf19.6787	0.989202	1.00685	13413.3	0.0216805	0.867818	822.691	1.468	0.517602
Cal602960W	orf19.3447	0.96906	1.00896	12644.5	0.0451187	0.950247	1270.11	1.467	0.535987
Cal305690C	orf19.230:orf19.231	0.992708	1.00512	13610.8	0.0234092	0.876486	860.581	1.4665	0.0671752
Cal504180W	orf19.3184:orf19.3183	0.98305	1.00788	13135.1	0.0108454	0.759179	552.638	1.466	0.766504
Cal603510W	orf19.3428	0.992121	1.00573	13573.6	0.0235107	0.878015	862.315	1.466	0.176777
CalR23880C	orf19.7670	0.96287	1.00795	12465.1	0.0701429	0.999381	1661.19	1.465	0.957423
CalR12920W	orf19.6635	0.98284	1.00809	13125.9	0.0109724	0.753507	556.665	1.4625	0.768625
Cal314500W	orf19.7412	0.90476	1.00598	11195.8	0.0436149	0.940446	1244.7	1.4615	1.14481
Cal223900W	orf19.5343	0.943803	1.00853	11985.3	0.0453237	0.95042	1273.6	1.461	0.849942
Cal610330C	orf19.2158	0.896976	1.00605	11058.2	0.0520663	0.959847	1386.04	1.461	1.62776
Cal103370C	orf19.3345	0.938303	1.00853	11860.1	0.0462836	0.951277	1289.67	1.4555	0.890247
Cal219790W	orf19.3590	0.870304	1.00388	10614	0.0423775	0.934627	1223.36	1.4555	1.323
Cal131670C	orf19.5019	0.983903	1.0079	13170.5	0.048089	0.951926	1320.15	1.455	0.248902
Cal704410C	orf19.6515	0.95891	1.0081	12358.8	0.0464617	0.949549	1292.8	1.455	0.668923
Cal116590W	orf19.4438	0.965912	1.00873	12551.3	0.0676218	1.006	1624.69	1.4545	0.887419
Cal703860W	orf19.6541	0.98355	1.0079	13156	0.0460552	0.951983	1285.66	1.453	0.019799
Cal119270W	orf19.391,orf19.392	0.888413	1.00571	10910.2	0.0440952	0.947982	1252.61	1.452	1.22047
Cal215050W	orf19.3151	0.974128	1.00793	12805.2	0.0484831	0.95581	1326.68	1.451	0.384666
Cal511050W	orf19.3984	0.928803	1.00759	11659.3	0.0456784	0.952345	1279.64	1.451	0.965908
CalR10920W	orf19.6308	0.949458	1.00796	12117.8	0.0470939	0.957069	1303.63	1.451	0.774989

## Sheet: Comm genesChIPChip RNA-seq >1.5
ChIPChip >1.5log of ratio and RNA-seq FC>1.5 padj<0.05 overlapping genes
Feature	Orf	Gene	Description
C1_08170C_A	orf19.5094	BUL1	Protein similar but not orthologous to S. cerevisiae Bul1; a protein involved in selection of substrates for ubiquitination; mutants are viable; macrophage/pseudohyphal-induced; rat catheter biofilm induced
C1_08940C_A	orf19.4752	MSN4	Zinc finger transcription factor; similar to S. cerevisiae Msn4, but not a significant stress response regulator in C. albicans; partly complements STRE-activation defect of S. cerevisiae msn2 msn4 double mutant; flow model biofilm induced
C2_08920W_A	orf19.215	-	Component of a complex containing the Tor2p kinase; possible a role in regulation of cell growth; Spider biofilm induced
C3_01800C_A	orf19.1666	-	Ortholog of Dig2, a MAP kinase-responsive inhibitor of Ste12; regulates mating-specific genes and invasive growth in S. cerevisiae; induced by alpha pheromone in SpiderM medium
C4_02990C_A	orf19.2693	GST2	Glutathione S transferase; induced by benomyl and in populations of cells exposed to fluconazole over multiple generations; regulated by Nrg1, Tup1; induced by nitric oxide; stationary phase enriched; Spider biofilm induced
C4_06480C_A	orf19.2886	CEK1	ERK-family protein kinase; required for wild-type yeast-hypha switch, mating efficiency, virulence in mice; Cst20-Hst7-Cek1-Cph1 MAPK pathway regulates mating, and invasive hyphal growth under some conditions; Spider biofilm induced
C5_03930C_A	orf19.3219		Ortholog of S. cerevisiae Sia1; involved in activation of the Pma1 plasma membrane H+-ATPase by glucose in S. cerevisiae; Spider biofilm induced
C7_01390W_A	orf19.6920	-	Protein of unknown function; induced during chlamydospore formation in both C. albicans and C. dubliniensis; Hap43-induced gene; Spider biofilm induced; F-12/CO2 early biofilm induced
C7_01680C_A	orf19.6556	-	Protein of unknown function; rat catheter, flow model and Spider biofilm induced
CR_00290W_A	orf19.7504	-	Ortholog of S. cerevisiae Rts3; a component of the protein phosphatase type 2A complex; Plc1-regulated; induced in core caspofungin response; Spider biofilm induced
CR_03890W_A	orf19.467	WOR3	Transcription factor; modulator of white-opaque switch; induced in opaque cells; promoter bound by Wor1; overexpression at 25 degr shifts cells to opaque state; deletion stabilizes opaque cells at higher temperatures; Spider biofilm induced
CR_06790C_A	orf19.1855	-	Predicted membrane transporter, member of the anion:cation symporter (ACS) family, major facilitator superfamily (MFS); Gcn4p-regulated; flucytosine induced; ketoconazole-repressed; oxidative stress-induced via Cap1p
CR_09880W_A	orf19.7561	DEF1	RNA polymerase II regulator; role in filamentation, epithelial cell escape, dissemination in RHE model; induced by fluconazole, high cell density; Efg1/hyphal regulated; role in adhesion, hyphal growth on solid media; Spider biofilm induced
C1_05140W_A	orf19.4056	BRG1	Transcription factor; recruits Hda1 to hypha-specific promoters; Tn mutation affects filamentation; Hap43-repressed; Spider and flow model biofilm induced; required for Spider biofilm formation; Bcr1-repressed in RPMI a/a biofilms

## Sheet: Top 150 genes in chipchip
Top 150 Orf19.1604 binding
orf19.4651
orf19.1836
orf19.4475
orf19.3469
orf19.1611
orf19.1610
snR44d
orf19.693
orf19.3699
orf19.6556
orf19.7504
orf19.915
orf19.6579
orf19.4865
orf19.6639
orf19.1830
snR8c
orf19.6023
snR64
orf19.5701
orf19.851
orf19.6249
orf19.1486
orf19.5940
orf19.7033
orf19.1693
orf19.1389
orf19.2529.1
orf19.2419
orf19.2951
orf19.4163
orf19.5070
orf19.2446
orf19.2445
orf19.2501
orf19.1742
orf19.3863
orf19.1893
orf19.1479
orf19.4872
orf19.1608
orf19.4189
orf19.6272
orf19.2447
orf19.2455
orf19.3439
orf19.921
orf19.3228
orf19.4892
orf19.2825
orf19.1063
orf19.3231
orf19.4821
orf19.4903
orf19.2433
orf19.2822
orf19.935
orf19.6029
tD(GUC)7
orf19.3302
orf19.4568
orf19.4698
orf19.4153
snR79
orf19.3777
orf19.4760
orf19.4128
snR78
orf19.3749
snR44c
orf19.84
orf19.1716
orf19.666
orf19.665
orf19.4145
snR79
orf19.4996
orf19.1233
orf19.936
orf19.4934
orf19.2847
orf19.3048
orf19.1484
orf19.3250
orf19.6780
orf19.2763
orf19.172
orf19.1767
orf19.7152
orf19.1078
orf19.1535
orf19.3615
orf19.5145
orf19.2002
orf19.3625
orf19.242.2
orf19.3430
orf19.1108
orf19.7043.1
orf19.4479
orf19.4347
orf19.6983
orf19.6783
orf19.2763
orf19.1541
orf19.6805
orf19.3448
orf19.3171
tQ(UUG)1
orf19.3223
orf19.6986
orf19.4461
orf19.717
orf19.1304
orf19.6583
orf19.6979
orf19.145
orf19.1766
orf19.4635
orf19.333
orf19.4217
orf19.2939
orf19.3369
orf19.1039
orf19.7443
orf19.3686
orf19.3264
orf19.7357
orf19.906
snR190
orf19.182
orf19.1718
orf19.6920
orf19.3982
orf19.1621
orf19.6312
orf19.2965.1
orf19.5711
orf19.4701
snR77b
orf19.942
orf19.81
orf19.6910
orf19.6912
orf19.2691
orf19.6017
orf19.1795.1
orf19.5854.1
orf19.4464
orf19.6769
orf19.6842
orf19.6843
orf19.2693
orf19.7072
orf19.2209
