# Supplementary material
Source: publisher figshare collection journal article supplement (https://gsajournals.figshare.com/articles/dataset/_/14600349)
Supplement: Supplementary file 2 [file 1]

**S1. Table: *Candida albicans* strains used in this study**

| Strain                            | Parent                    | Description                                                                                          | Source     |
|-----------------------------------|---------------------------|------------------------------------------------------------------------------------------------------|------------|
| SC5314                            | Clinical Isolate          | Wild type                                                                                            | [36]       |
| SN148                             | SN76                      | <i>arg4/arg4 leu2/leu2 his1/his1 ura3/ura3</i>                                                       | [44]       |
| SC1604GAD1A                       | SC5314                    | <i>ADH1/adh1::P<sub>ADH1</sub>-RHA1-GAL4AD-HA-caSAT1</i>                                             | [5]        |
| SC1604M4B                         | SC5314                    | <i>rha1Δ::FRT/rha1Δ::FRT</i>                                                                         | This study |
| SC1604MK2B                        | SC1604M4B                 | <i>rha1Δ::FRT/RHA1::FRT</i>                                                                          | This study |
| <i>RHA1-TAP</i>                   | SN148                     | <i>RHA1/RHA1-TAP-URA3</i>                                                                            | This study |
| <i>rha1<sup>-/-</sup></i>         | SC5314                    | <i>rha1/rha1 ENO1/eno1:: natMX4</i>                                                                  | This study |
| <i>brg1Δ/Δ</i>                    | SC5314                    | <i>brg1::HYGB/brg1::HYGB</i>                                                                         | This study |
| <i>ume6Δ/Δ</i>                    | SC5314                    | <i>ume6::HYGB/ume6::HYGB</i>                                                                         | This study |
| <i>rha1<sup>-/-</sup>brg1Δ/Δ</i>  | <i>rha1<sup>-/-</sup></i> | <i>rha1/rha1 ENO1/eno1:: natMX4brg1::HYGB/brg1::HYGB</i>                                             | This study |
| <i>rha1<sup>-/-</sup> ume6Δ/Δ</i> | <i>rha1<sup>-/-</sup></i> | <i>rha1/rha1 ENO1/eno1:: natMX4ume6::HYGB/ume6::HYGB</i>                                             | This study |
| Rha1-GOF <i>brg1Δ/Δ</i>           | Rha1-GOF                  | <i>brg1::HYGB/brg1::HYGB ADH1/adh1::P<sub>ADH1</sub>-RHA1-GAL4AD-HA-caSAT1</i>                       | This study |
| Rha1-GOF <i>ume6Δ/Δ</i>           | Rha1-GOF                  | <i>ume6::HYGB/ume6::HYGB ADH1/adh1::P<sub>ADH1</sub>-RHA1-GAL4AD-HA-caSAT1</i>                       | This study |
| SCUME6M4A                         | SC5314                    | <i>ume6Δ::FRT/ume6Δ::FRT</i>                                                                         | This study |
| SC <i>ume6Δ</i> 1604GAD1A         | SCUME6M4A                 | <i>ume6Δ::FRT/ume6Δ::FRT ADH1/adh1::P<sub>ADH1</sub>-RHA1-GAL4AD-HA-caSAT1</i>                       | This study |
| Rha1GOF <i>brg1Δ/Δume6Δ/Δ</i>     | SC <i>ume6Δ</i> 1604GAD1A | <i>brg1::HYGB/brg1::HYGB ume6Δ::FRT/ume6Δ::FRT ADH1/adh1::P<sub>ADH1</sub>-RHA1-GAL4AD-HA-caSAT1</i> | This study |
