# Supplementary material
Source: publisher figshare collection journal article supplement (https://gsajournals.figshare.com/articles/dataset/_/14600349)
Supplement: Supplementary file 3 [file 1]

**S2. Table: Oligonucleotides used in this study**

| Oligo           | Sequence (5'-3')                                                           | Description                      |
|-----------------|----------------------------------------------------------------------------|----------------------------------|
| P7              | ATCTCATTAGATTTGGAAGCTTGTGGGT<br>T                                          | 5' CAS9                          |
| P8              | TTCGAGCGTCCCAAACCTTCT                                                      | 3' CAS9                          |
| P1              | AAGAAAGAAAGAAAACAGGAGTGAA                                                  | 5' sgRNA                         |
| P4              | ACAAATATTTAAACTCGGGACCTGG                                                  | 3' sgRNA                         |
| P5              | GCGGCCGCAAGTGATTAGACT                                                      | 5' sgRNA                         |
| P6              | GCAGCTCAGTGATTAAGAGTAAAGATG<br>G                                           | 3' sgRNA                         |
| orf19.1604-5'FW | TATAGGGCGAATTGGAGCTCGACGTT<br>GATAATTTTCATCACC                             | <i>RHA1</i> deletion             |
| orf19.1604-5'RV | AGAGCGGCCCGCCACCGCGGTGGTATA<br>AGTATAATTTAGGGG                             | <i>RHA1</i> deletion             |
| orf19.1604-3'FW | AGTATAGGAATTCCTCGAGCAAAAATG<br>AAATAGGTAAGCGA                              | <i>RHA1</i> deletion             |
| orf19.1604-3'RV | AAAAGCTGGGTACCGGGCCCAATCAG<br>GGAACCAAAGGTGA                               | <i>RHA1</i> deletion             |
| 1604-5'FW-Kompl | ATATGAGCTCGGGCCCGACGTTGATA<br>ATTTTCATCACC                                 | <i>RHA1</i> reinsertion          |
| 1604-3'RV-Kompl | AAAAGCTGGGTACCGCGGAATCAG<br>GGAACCAAAGGTGA                                 | <i>RHA1</i> reinsertion          |
| UME6-ko1        | CATTAGAGCTCAAATTCCTTGAGAAAG<br>ATCAAAG                                     | <i>UME6</i> deletion             |
| UME6-ko2        | AAACCCGCGGAACTAATTGGAAGTAA<br>TTGAGG                                       | <i>UME6</i> deletion             |
| UME6-ko3        | GTTAATCTCGAGGCTAAGTTAAGAATT<br>AAGAATTAACAGG                               | <i>UME6</i> deletion             |
| UME6-ko4        | CATTAGGGCCCAGACTTTTCCGTATGA<br>TGAAACA                                     | <i>UME6</i> deletion             |
| RHA1-sg-F       | ATTTGCAGCTTATAGAAAATAACACG                                                 | sgRNA for <i>RHA1</i>            |
| RHA1-sg-R       | AAAACGTGTTATTTTCTATAAGCTGC                                                 | sgRNA for <i>RHA1</i>            |
| RHA1-Rep-F      | CAGTCATACTCCTGTACCTTTGCATTT<br>GAACGACCAGGCTCAGCTTATAGAATA<br>ATAACACTCGAG | repair DNA for <i>RHA1</i>       |
| RHA1-Rep-R      | ATATTGAGGACCCAGTGTGCGCCGCTG<br>GCATTGAAAACTCGAGTGTTATTATT<br>CTATAAGCTGAGC | repair DNA for <i>RHA1</i>       |
| RHA1-In-F       | AGTGCACAGAAGAGCTACCTTC                                                     | 5' <i>RHA1</i> Internal checking |
| RHA1-In-R       | GTTGGTGCTGATGGTTGTGGTT                                                     | 3' <i>RHA1</i> Internal checking |
| RHA1-F          | TCTCAAGCAGCGAAAATCTCCA                                                     | 5' <i>RHA1</i> checking primer   |
| RHA1-R          | CGGGGTACCATCTGGTTCAATAAAGG<br>C                                            | 3' <i>RHA1</i> checking primer   |
| BRG1-sg-F       | TCACGATCAACCATTAGTGGGTTTTAG<br>AGCTAGAAATAGCAAGTTAAA                       | sgRNA for <i>BRG1</i> promoter   |
| BRG1-sg-R       | CCACTAATGGTTGATCGTGACAAATTA<br>AAAATAGTTTACGCAAGTC                         | sgRNA for <i>BRG1</i> promoter   |

**S2. Table: Oligonucleotides used in this study**

|                 |                                                                                                                                           |                                        |
|-----------------|-------------------------------------------------------------------------------------------------------------------------------------------|----------------------------------------|
| BRG1-HygBRep-F  | ATTTGATATTTCAACGTTATTTCTCCAT<br>CCATACTTGTTACATTATAAATATTCAC<br>TACTATTCCAGAAATTCAAATTGCAAGT<br>ATATCTGGCAAACCTG                          | repair DNA for <i>BRG1</i><br>promoter |
| BRG1-HygBRep-R  | TGTGCAAAAAATTAATTA AAACTATTT<br>TAATGACGAATTAAGGAATTTGGGTT<br>GGGTAAGCAACAGGAATACCGCCAGT<br>TTATGATGGAATGAATGGG                           | repair DNA for <i>BRG1</i><br>promoter |
| BRG1-In-F       | GCAACAACAACCAGTGCACGTA                                                                                                                    | 5' BRG1 Internal<br>checking           |
| BRG1-In-R       | TGTGGTTGTTGTGGTGGGGTAT                                                                                                                    | 3' BRG1 Internal<br>checking           |
| BRG1-F          | ACCCGTTTAACATTTGCAGCTT                                                                                                                    | 5' BRG1 checking primer                |
| BRG1-R          | TTCGGTTTGATCCAGCTCAGGA                                                                                                                    | 3' BRG1 checking primer                |
| UME6-sg-F       | ATGAGATCTTTGGCACCAGTGTTTTAG<br>AGCTAGAAATAGCAAGTTAAA                                                                                      | sgRNA for <i>UME6</i><br>promoter      |
| UME6-sg-R       | ACTGGTGCCAAAGATCTCATCAAATTA<br>AAAATAGTTTACGCAAGTC                                                                                        | sgRNA for <i>UME6</i><br>promoter      |
| UME6-HygBRep-F  | ATATTCTATATCTTCACTCCAAACATCA<br>ATATCCTCAATTTACTTCCAATTAGTTT<br>TATTTTTTAATCCACTGTATAAGCAAGT<br>ATATCTGGCAAACCTG                          | 5' UME6 Repair DNA                     |
| UME6-HygBRep-R  | GCAACAACAACAACAATAACCACC<br>GTCAACCGTCAACCTGTTAATTCTTAA<br>TTCTTAACTTAGCCTAATTTTTATGATG<br>GAATGAATGGG                                    | 3' UME6 Repair DNA                     |
| UME6-In-F       | TCTTCAGCACCAAATTCGCCTT                                                                                                                    | 5' UME6 Internal<br>checking           |
| UME6-In-R       | GCAGCACTAACACTGACACCAC                                                                                                                    | 3' UME6 Internal<br>checking           |
| UME6-F          | TGGCTCATTATTGCTTTGCTTT                                                                                                                    | 5' UME6 checking primer                |
| UME6-R          | CGGGAAAAGTTGCAAGAGTTGGT                                                                                                                   | 3' UME6 checking primer                |
| RHA1_TAP_URA3_F | ATATTTGGACGTGAGGGTAAAGTCTTT<br>GATGATATTGGAACCATAAAACAGGGA<br>CTTGAAAACCTTTGAGTTGGCACAAAAG<br>GAAATAGCAAAATGTGTTGGTCGACGG<br>ATCCCCGGG TT | 5' RHA1_TAP_URA3                       |
| RHA1_TAP_URA3_R | TGCTACATTCACTAAAACTGTATCTAC<br>ATAATGGTTTTATTGATAGCCAGTACTA<br>AAATTTCAATACAATCGCTTACCTATTT<br>CATTTTGTTAACACATCGATGAATTCGA<br>GCTCGTT    | 3' RHA1_TAP_URA3                       |
| HygB-F-5'       | TGCTTCTGCTGCTTTGCCAATTCAG                                                                                                                 | 5' HYGB checking primer                |
| Hygb-R-3'       | ACAACCATCAGTCCAAACAGCAGCTGA                                                                                                               | 3' HYGB checking primer                |
| Nat-in-Fwd      | TGATTGATCTGTCCGGCAGTGGT                                                                                                                   | 5' NAT Internal checking               |
| Nat-in-Rvs      | GTCAATGCCGCCGAGAGTAAAG                                                                                                                    | 3' NAT Internal checking               |
